# Supplementary material for: Identification of a major epitope by anti-interferon-γ autoantibodies in patients with mycobacterial disease
Source: Springer Nature journal article supplement (doi:10.1038/nm.4158), 2016-08-15
Supplement: 41591_2016_BFnm4158_MOESM29_ESM.pdf [file 41591_2016_BFnm4158_MOESM29_ESM.pdf]

Supplementary Figure 1

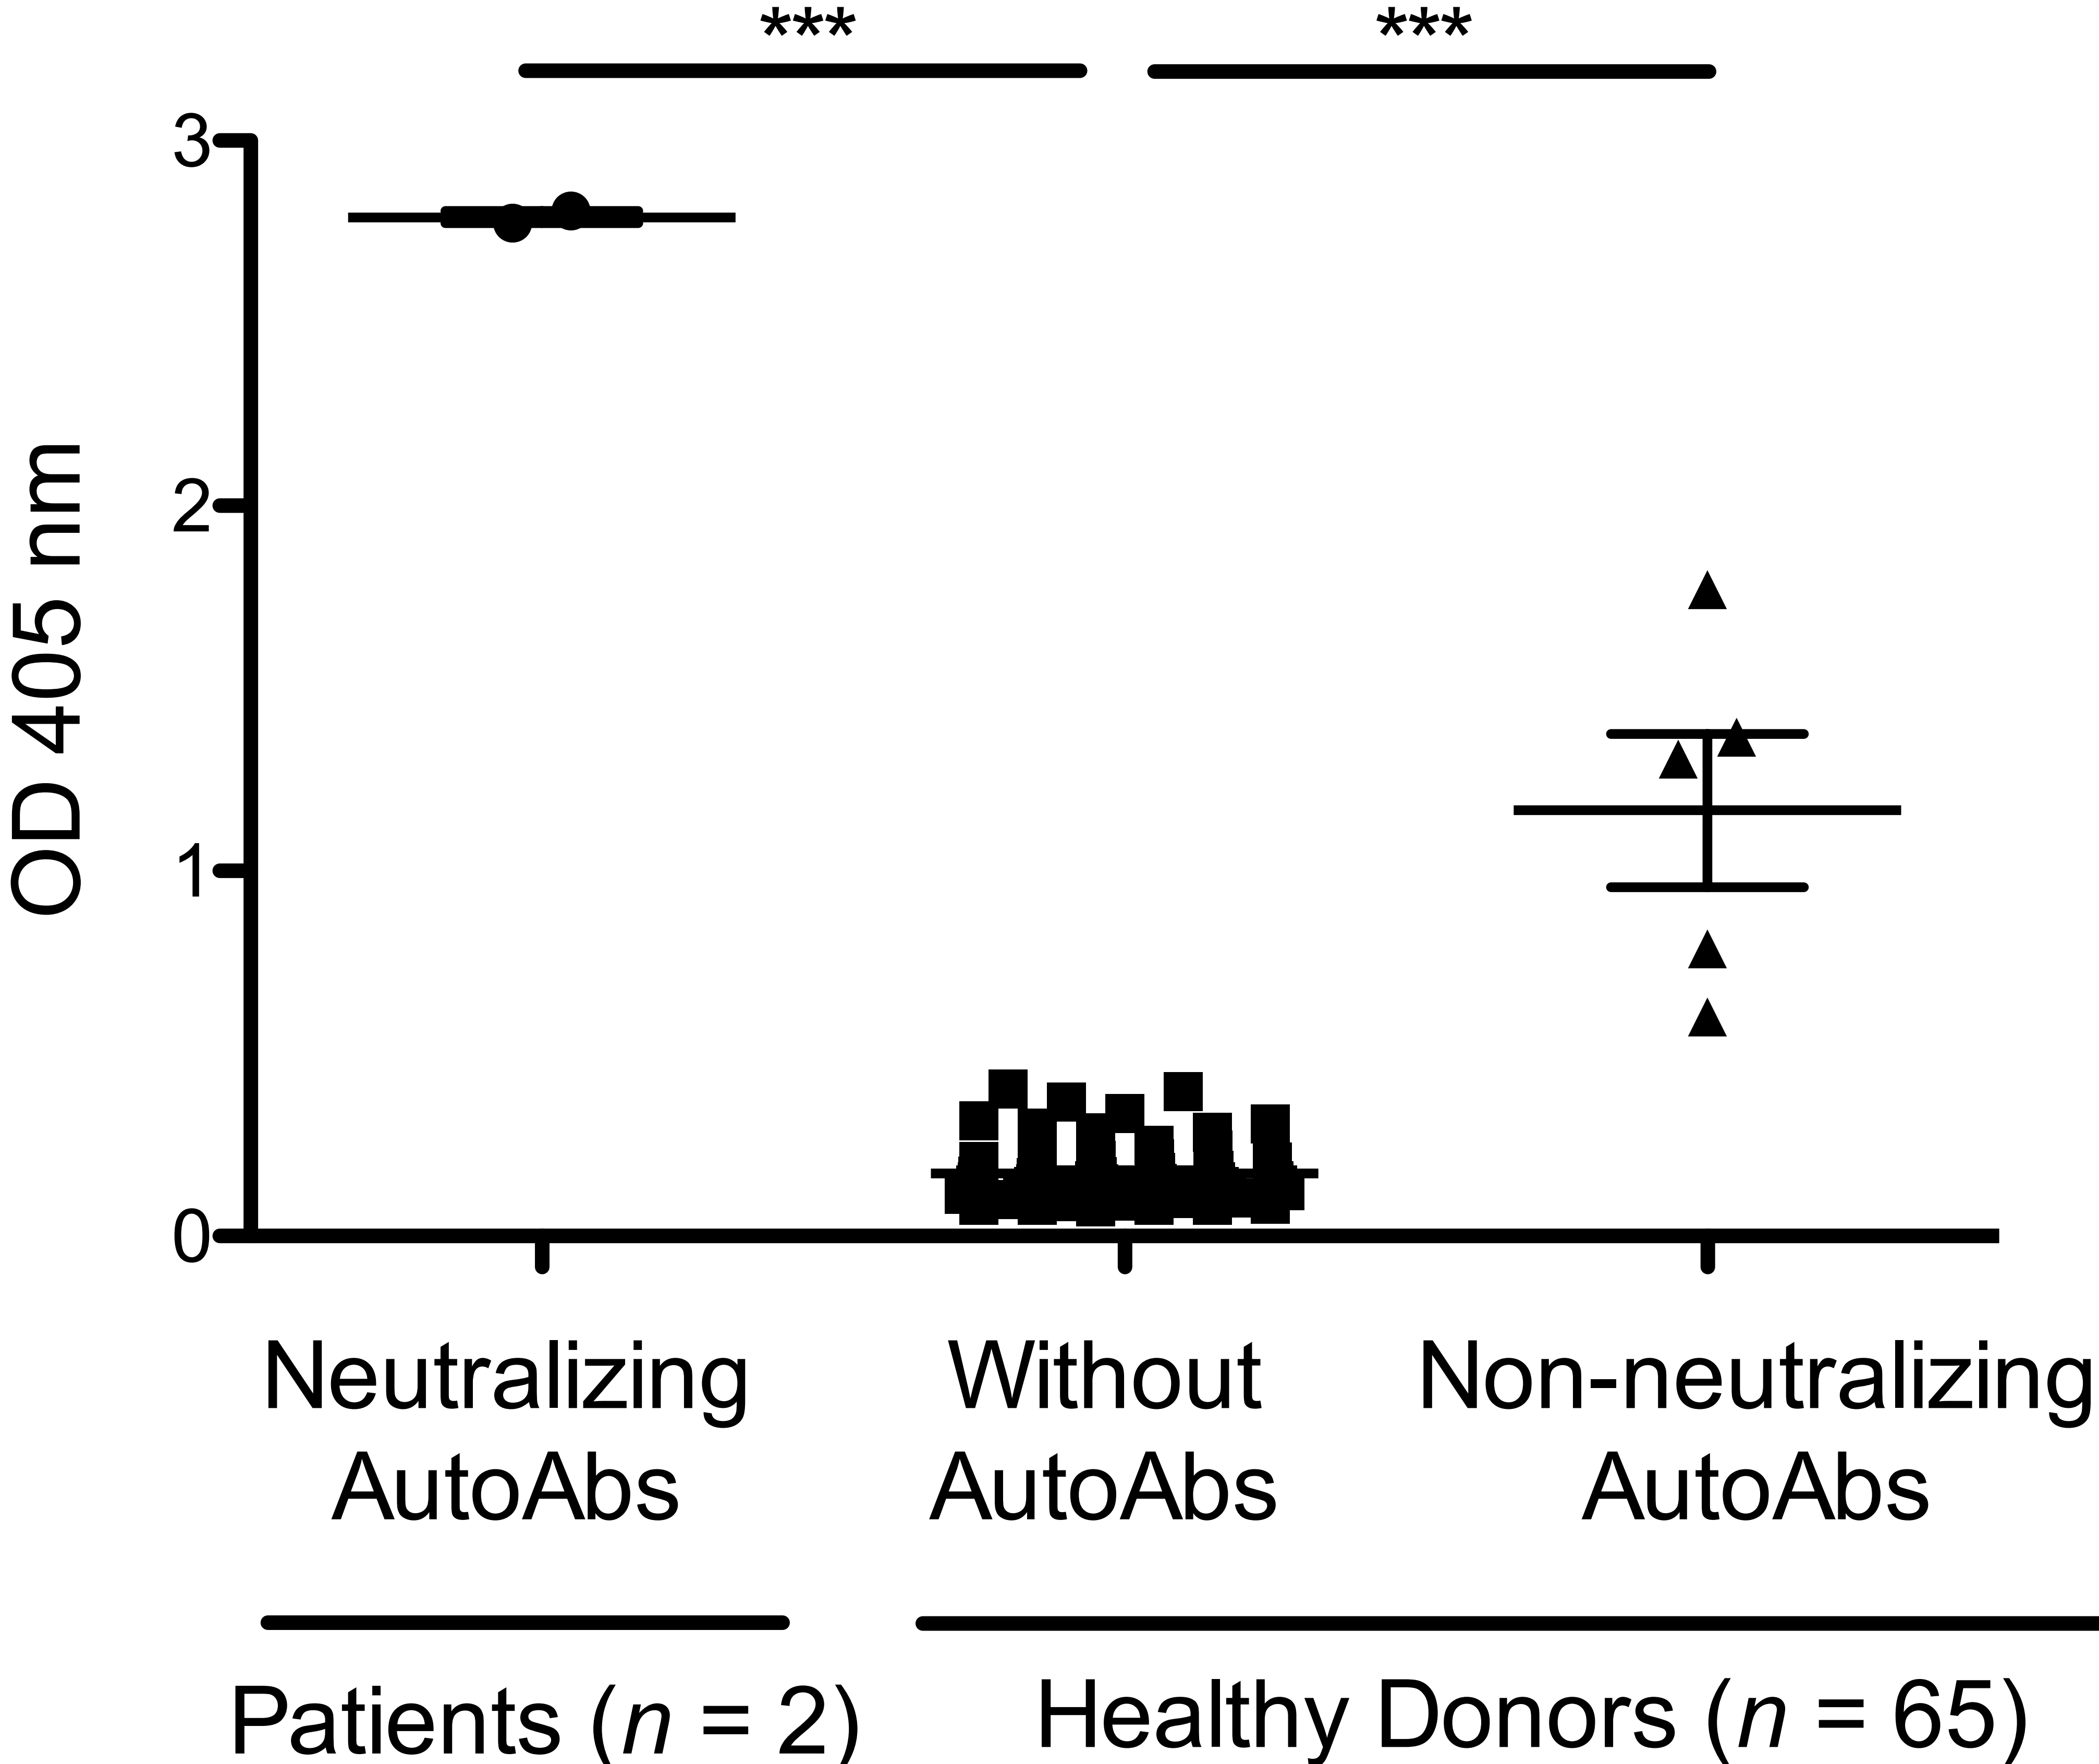

**Supplementary Figure 1. Direct IFN- $\gamma$  ELISA used to detect AutoAbs against IFN- $\gamma$ .** The data are expressed as the mean optical density (OD) at 405 nm; plasma samples from IFN- $\gamma$  AutoAbs patients ( $n = 2$ ), and healthy controls ( $n = 65$ ) were used. Individual data points are shown, together with the mean and s.e.m. of each group in a representative experiment. \*\*\* $P < 0.001$  in one-way ANOVA with a post-hoc Tukey's test.

# Supplementary Figure 2

**a**

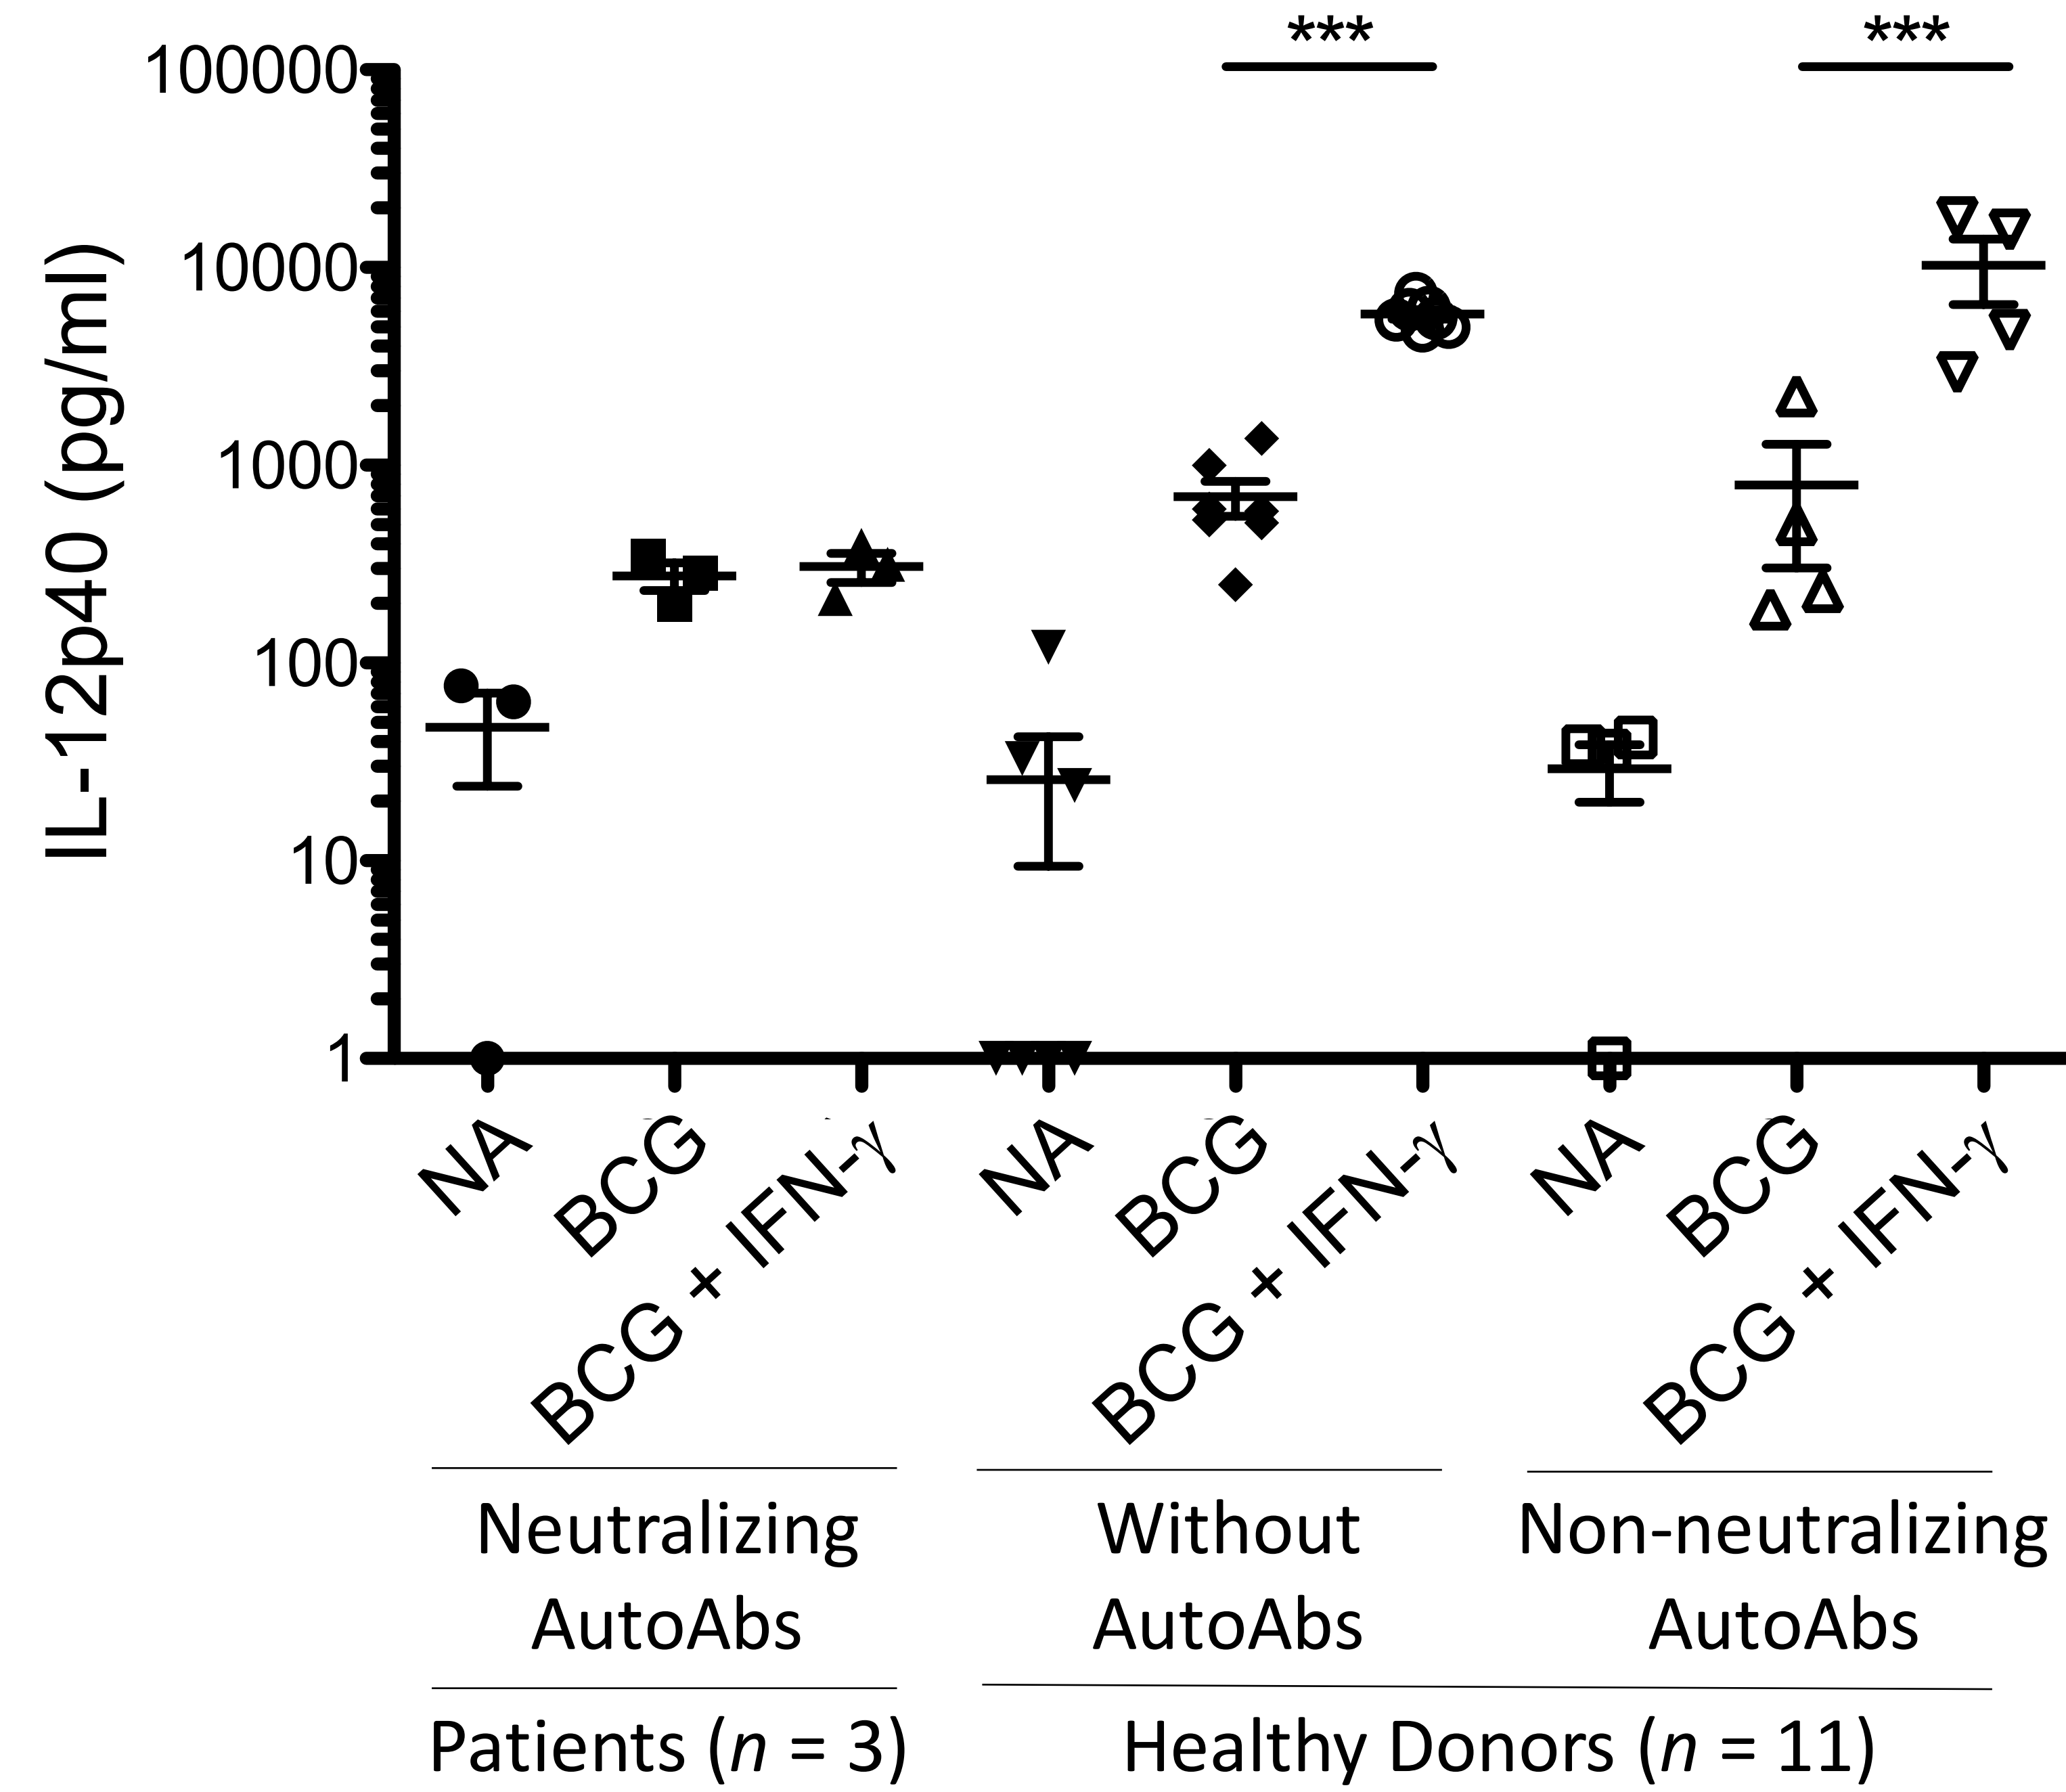

**b**

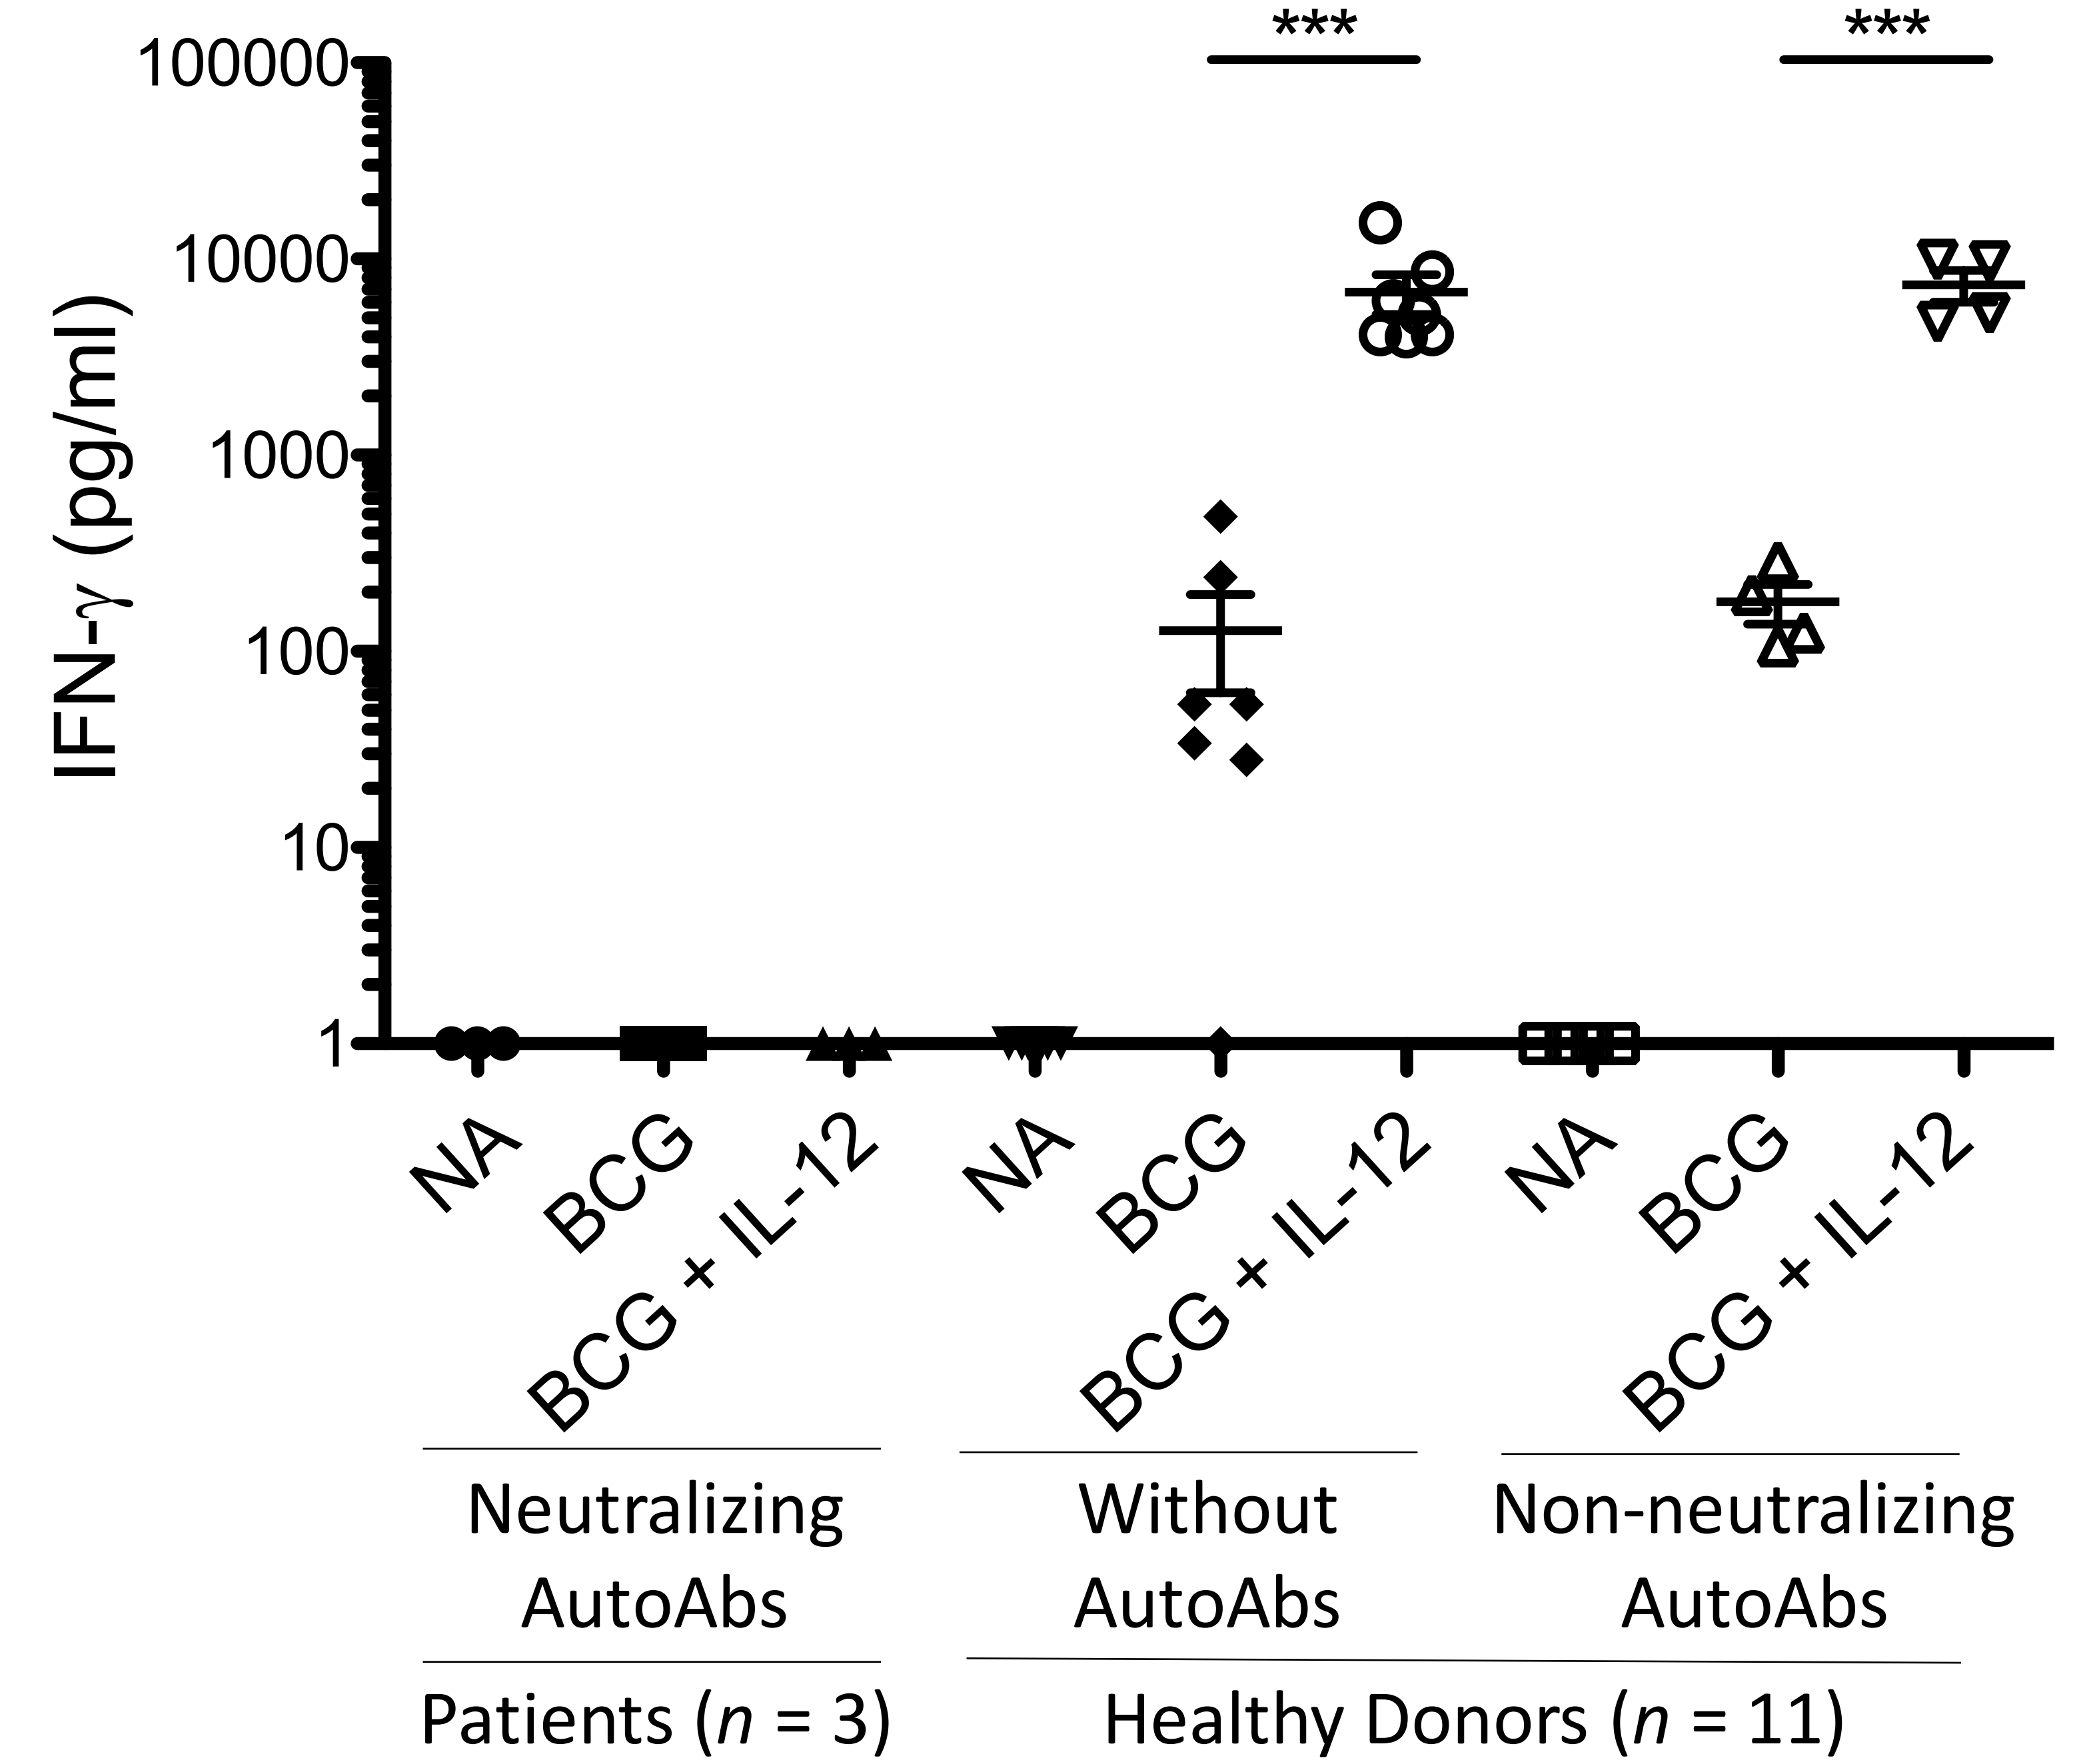

**Supplementary Figure 2. Non-neutralizing AutoAbs against IFN- $\gamma$  did not affect the ability of IFN- $\gamma$  to induce IL-12 production.** (a) IL-12p40 production levels were determined by ELISA in the absence of activation, or after activation with BCG or BCG plus IFN- $\gamma$ , in whole blood from individuals from three groups: IFN- $\gamma$  AutoAbs patients ( $n = 3$ ), healthy controls without AutoAbs ( $n = 7$ ), and healthy controls with non-neutralizing IFN- $\gamma$  AutoAbs ( $n = 4$ ). (b) IFN- $\gamma$  production levels were determined by ELISA in the absence of activation or after activation with BCG or BCG plus IL-12 in whole blood from individuals from three groups: IFN- $\gamma$  AutoAbs patients ( $n = 3$ ), healthy controls without AutoAbs ( $n = 7$ ), and healthy controls with non-neutralizing IFN- $\gamma$  AutoAbs ( $n = 4$ ). Individual data points are shown, together with mean and s.e.m. values for each group in a representative experiment.

\*\*\* $P < 0.001$  in one-way ANOVA with a post-hoc Tukey's test.

# Supplementary Figure 3

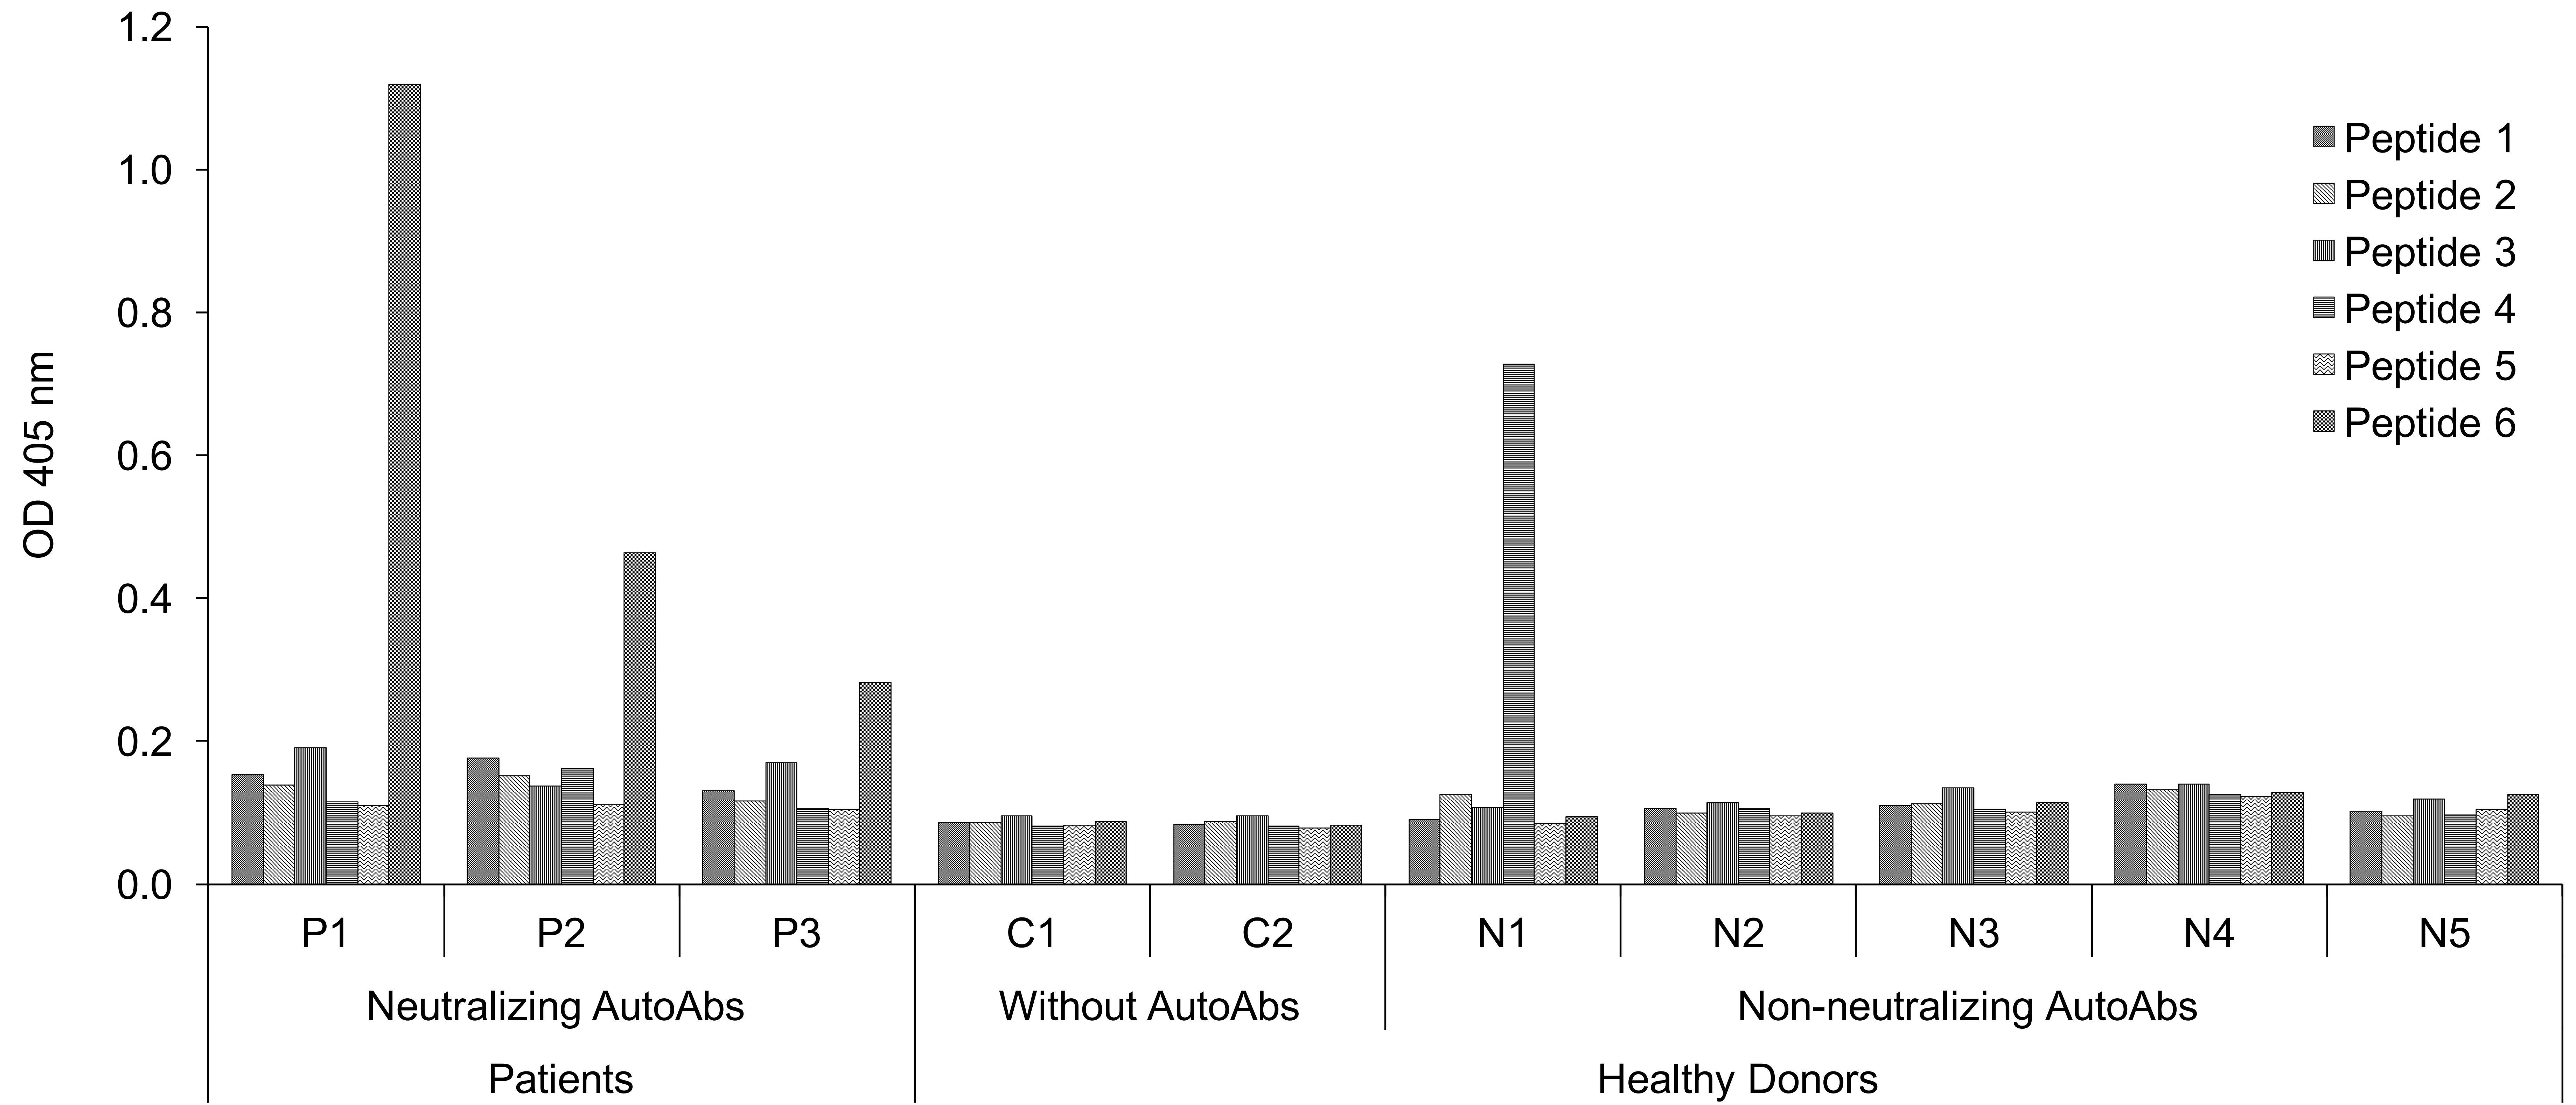

**Supplementary Figure 3. Epitope mapping to determine the affinity, in plasma, of synthetic peptide binding to IFN- $\gamma$ .** Epitope mapping to assess the binding affinity of the synthetic peptide for IFN- $\gamma$ , presented as the mean optical density (OD) at 405 nm; we used plasma samples from IFN- $\gamma$  AutoAbs patients ( $n = 3$ , P1–3), healthy controls without AutoAbs ( $n = 2$ , C1 and C2), and healthy controls with non-neutralizing IFN- $\gamma$  AutoAbs ( $n = 5$ , N1–5)

# Supplementary Figure 4

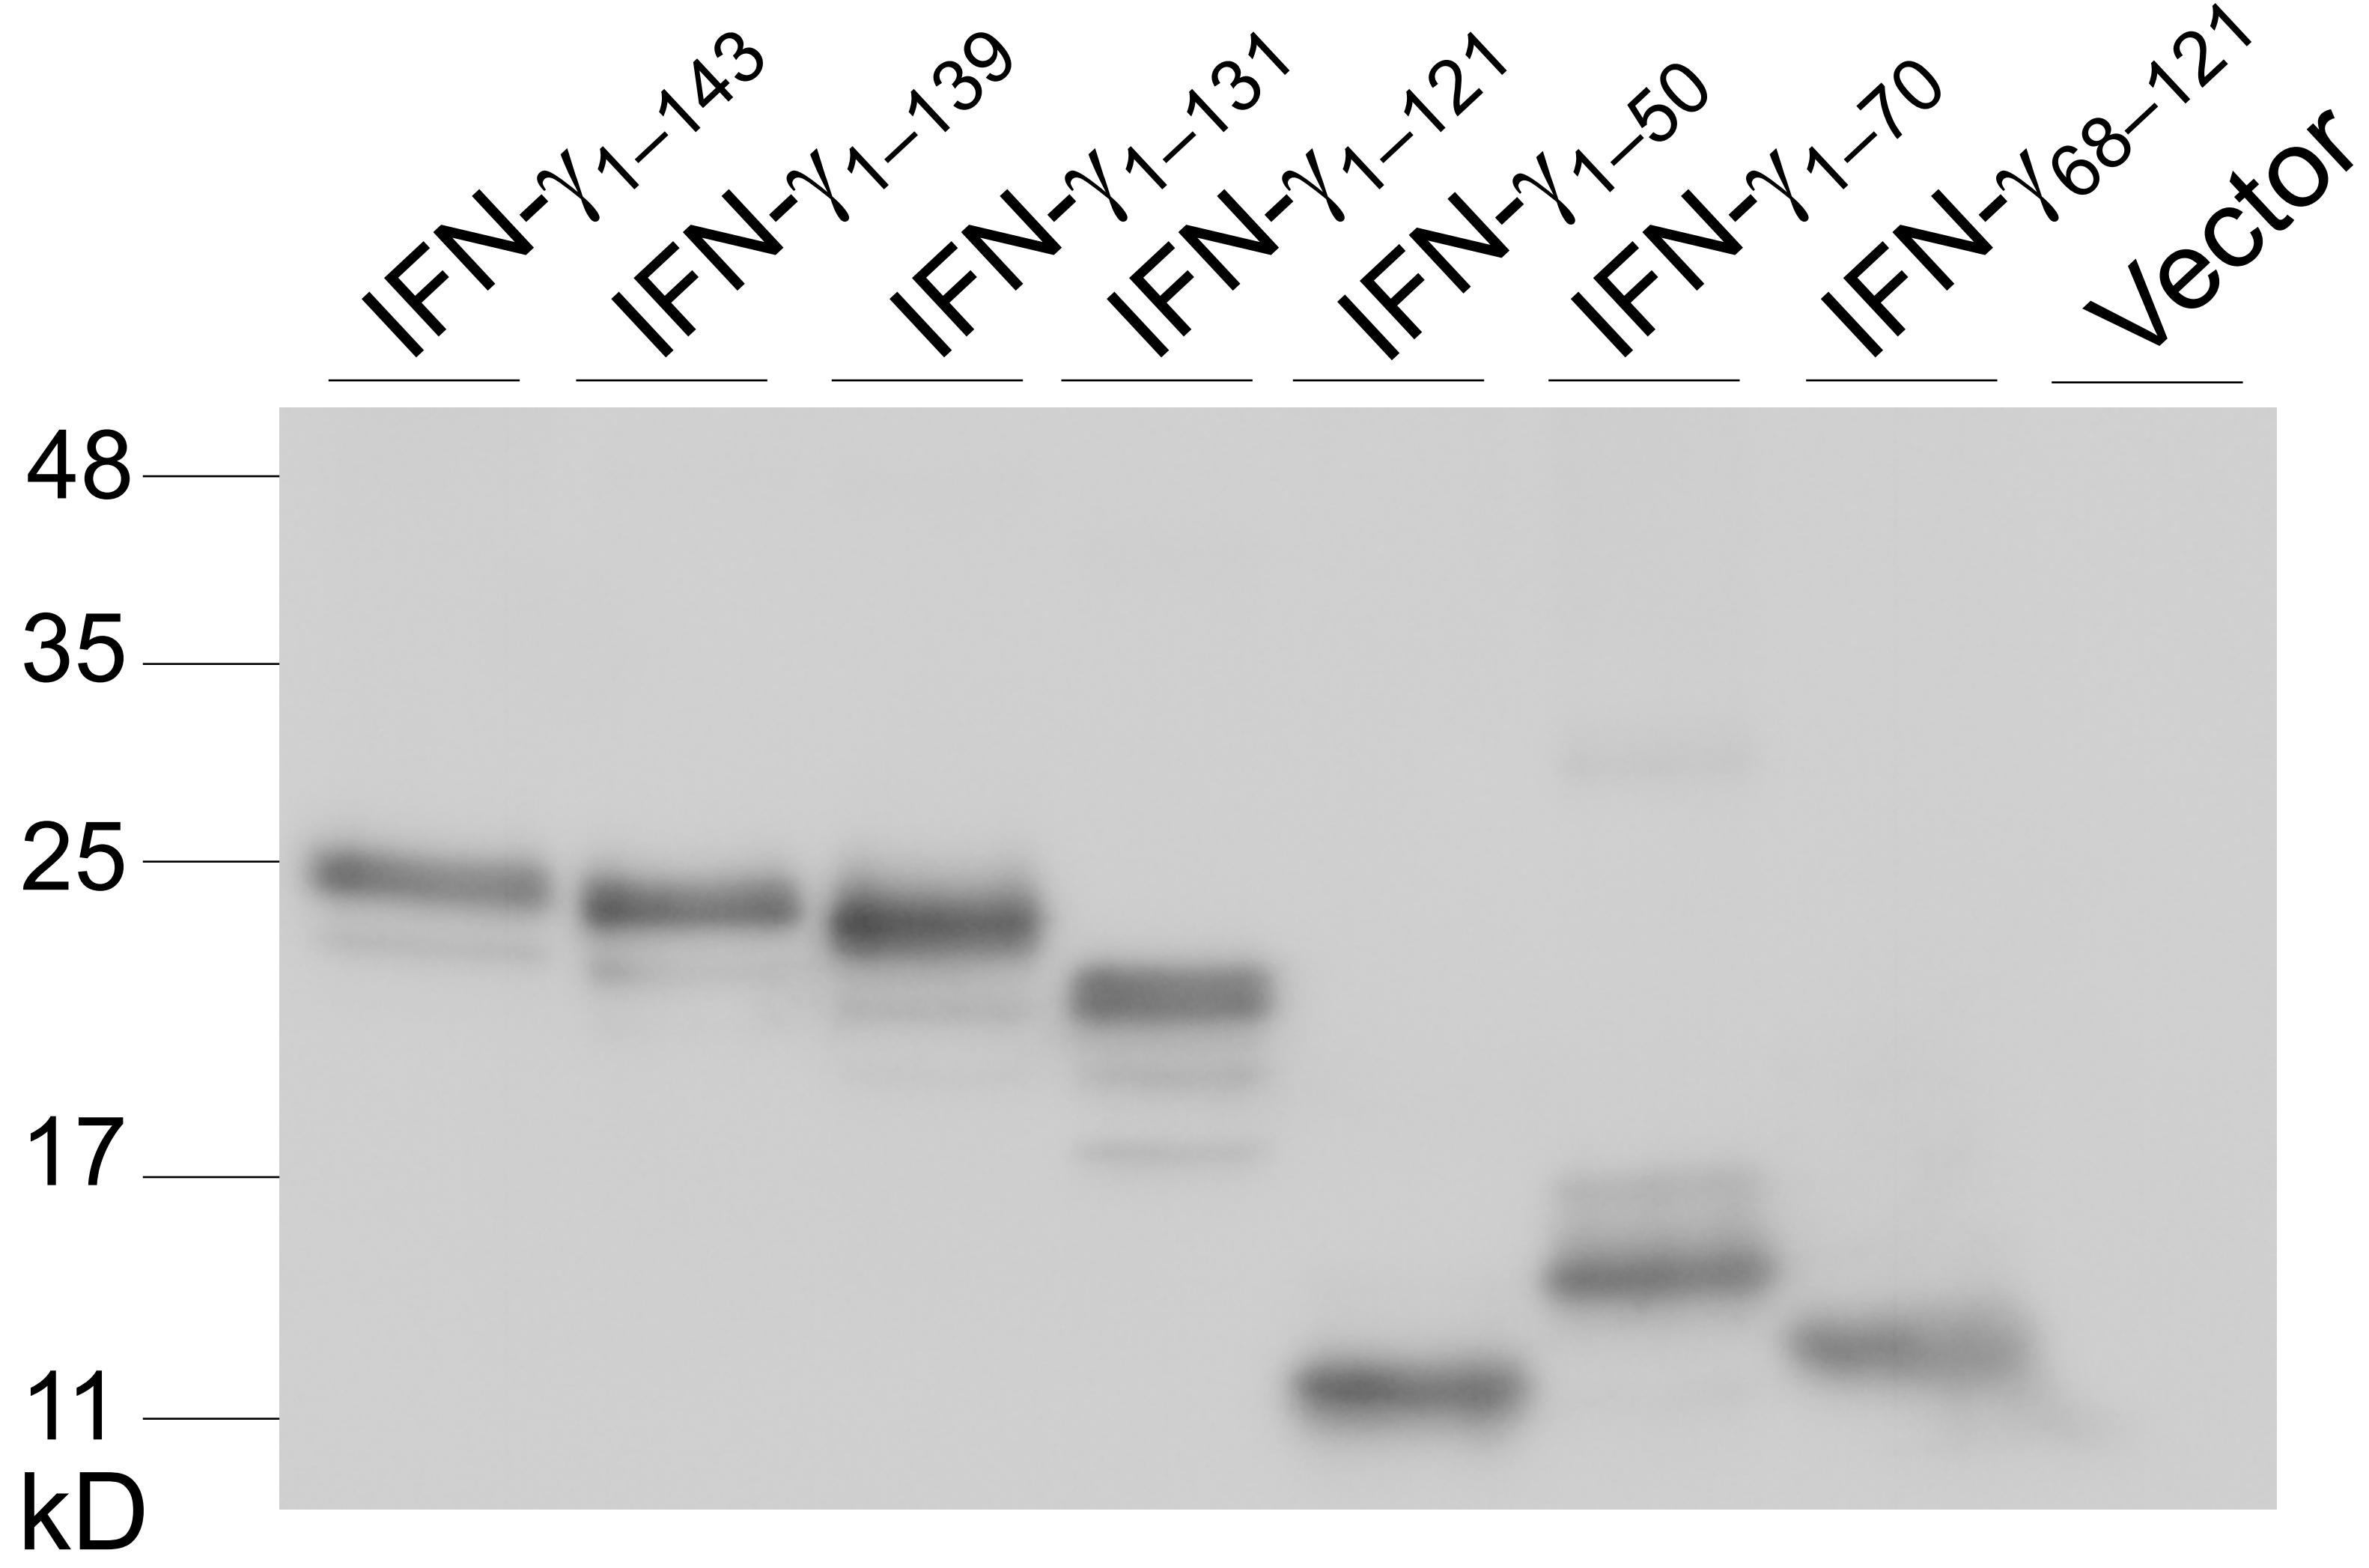

**Supplementary Figure 4. Expression of different forms of recombinant IFN- $\gamma$ .** Western blot analysis showed the expression of different forms of recombinant IFN- $\gamma$  detected with a V5-tagged antibody.



Supplementary Figure 5

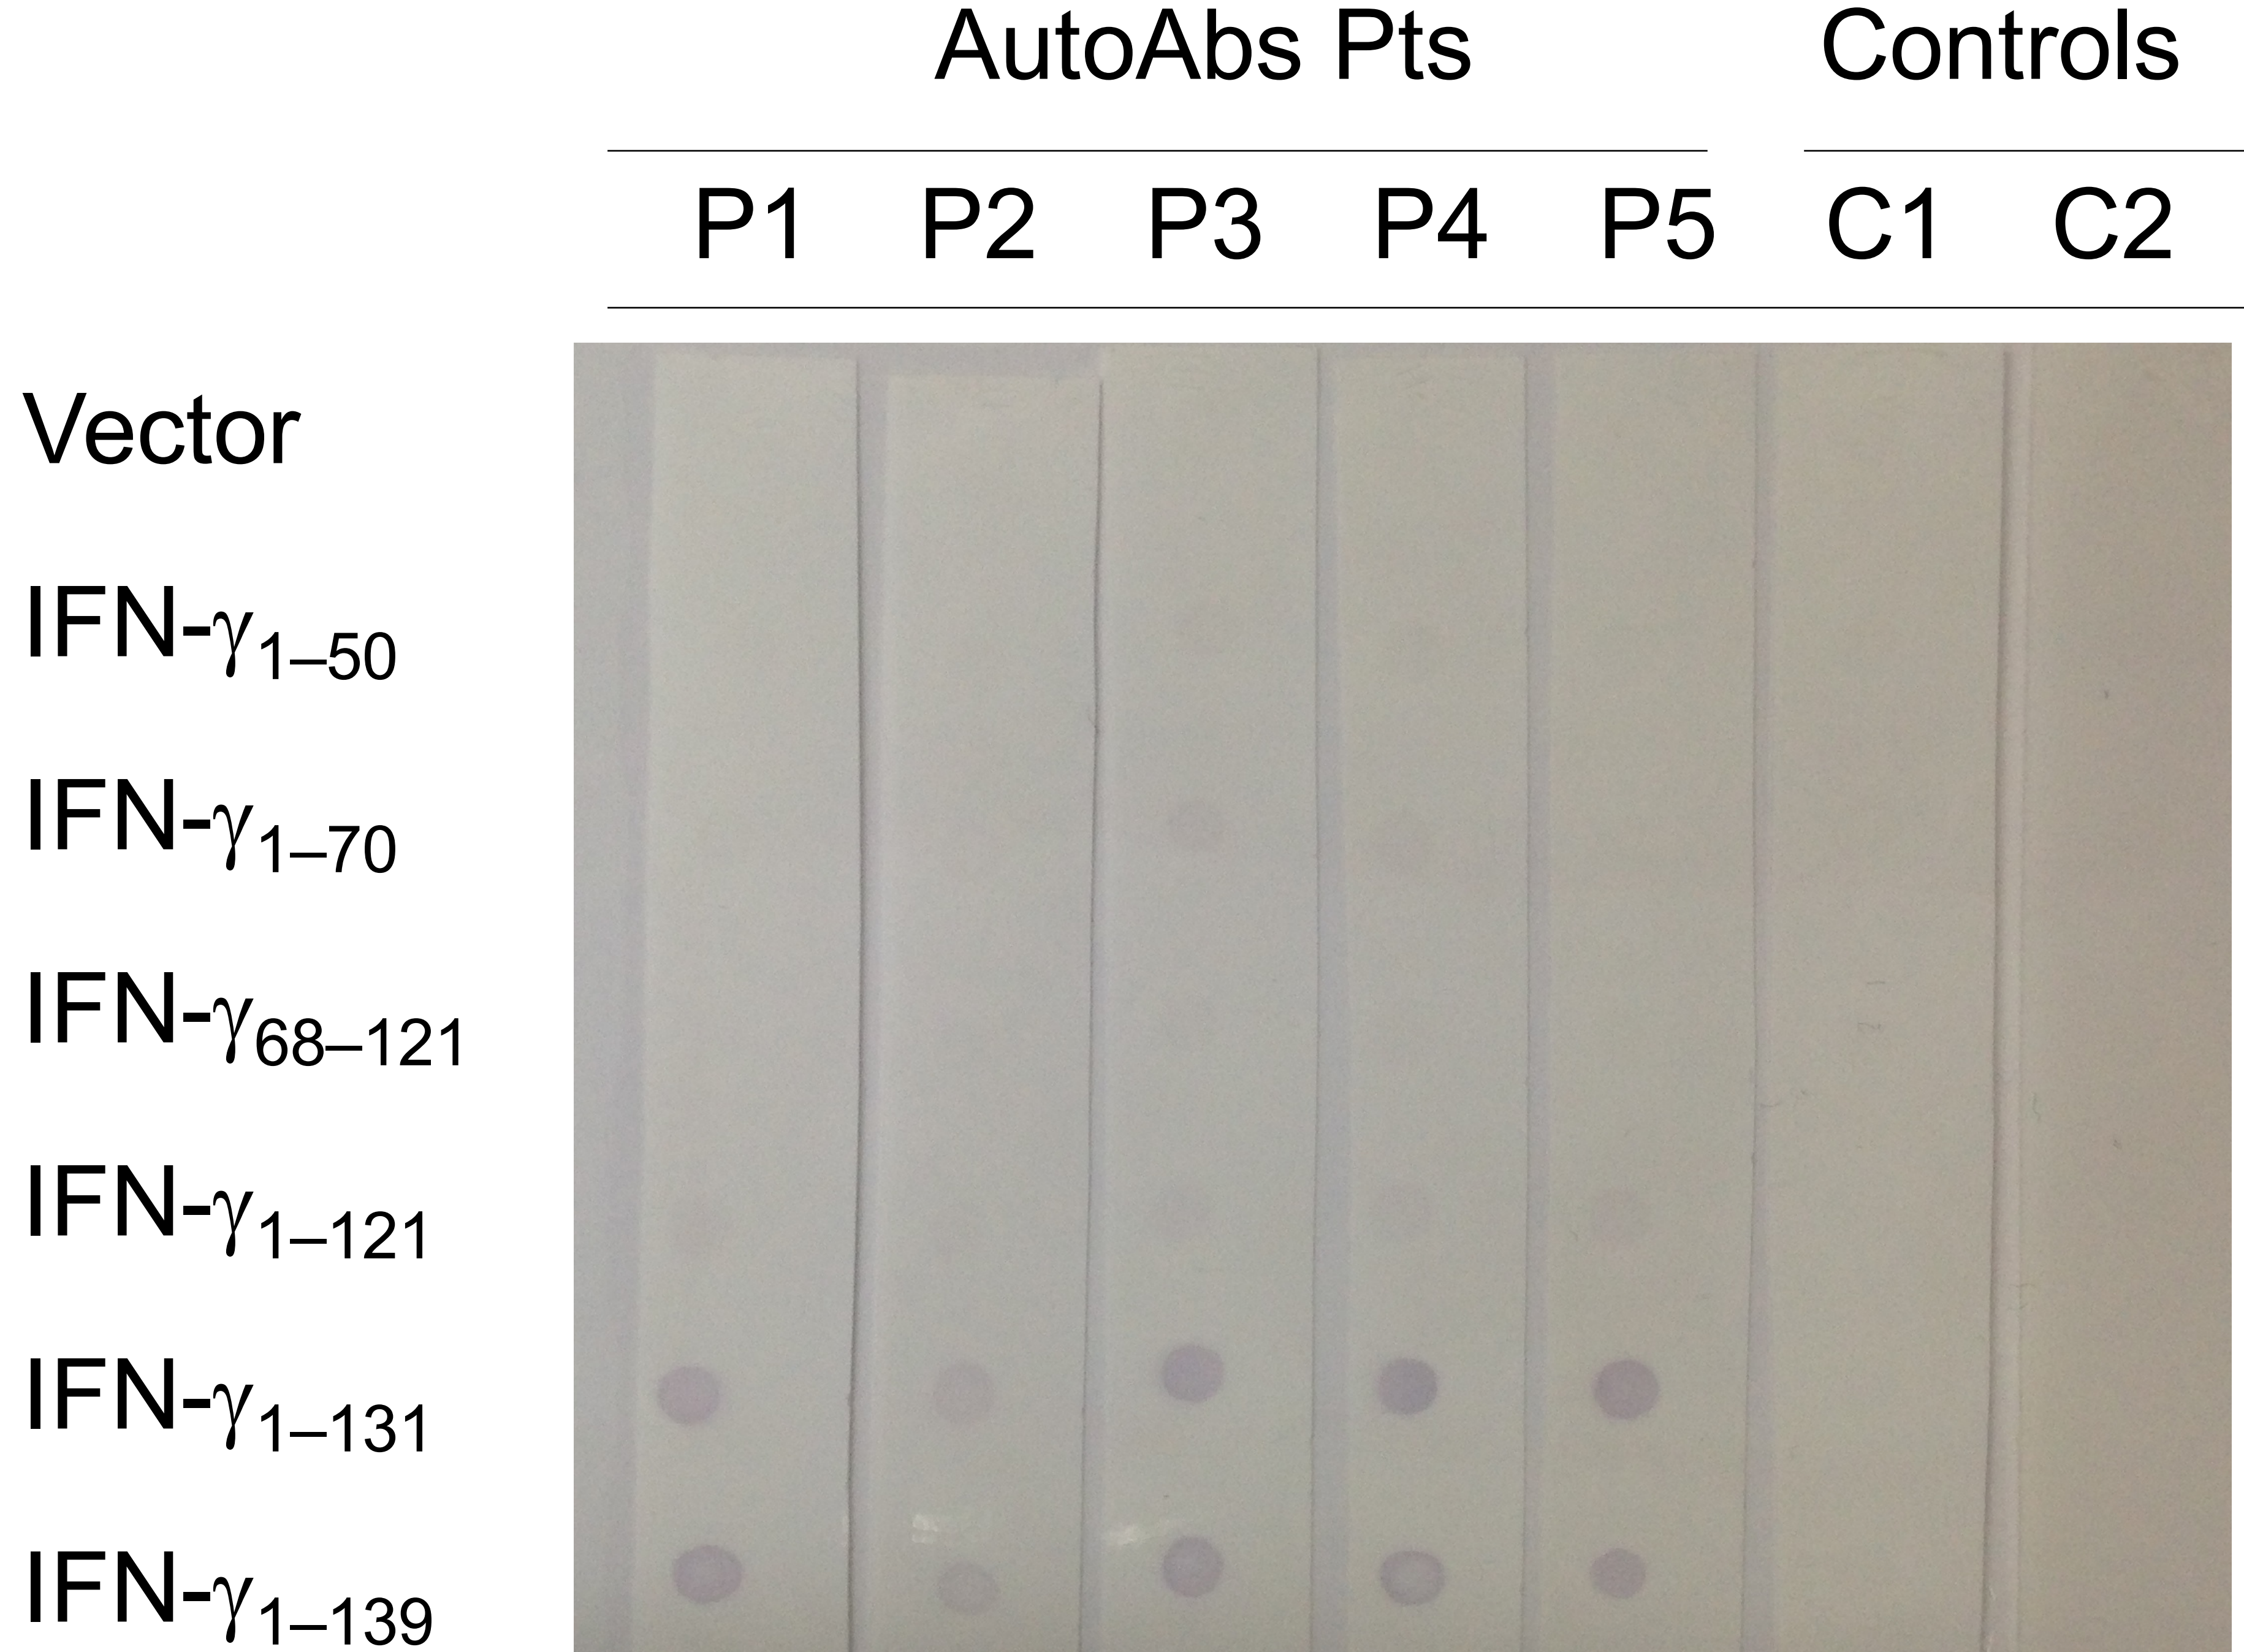



**Supplementary Figure 5. Dot blot to assess the affinity of binding, in plasma, of the recombinant proteins to IFN- $\gamma$ .** Plasma samples from randomly selected IFN- $\gamma$  AutoAbs patients ( $n = 5$ , P1–5) and healthy controls ( $n = 2$ , C1 and C2) were probed for the control vector and IFN- $\gamma_{1-50}$ , IFN- $\gamma_{1-70}$ , IFN- $\gamma_{68-121}$ , IFN- $\gamma_{1-121}$ , IFN- $\gamma_{1-131}$ , and IFN- $\gamma_{1-139}$  recombinant proteins.

## Supplementary Figure 6

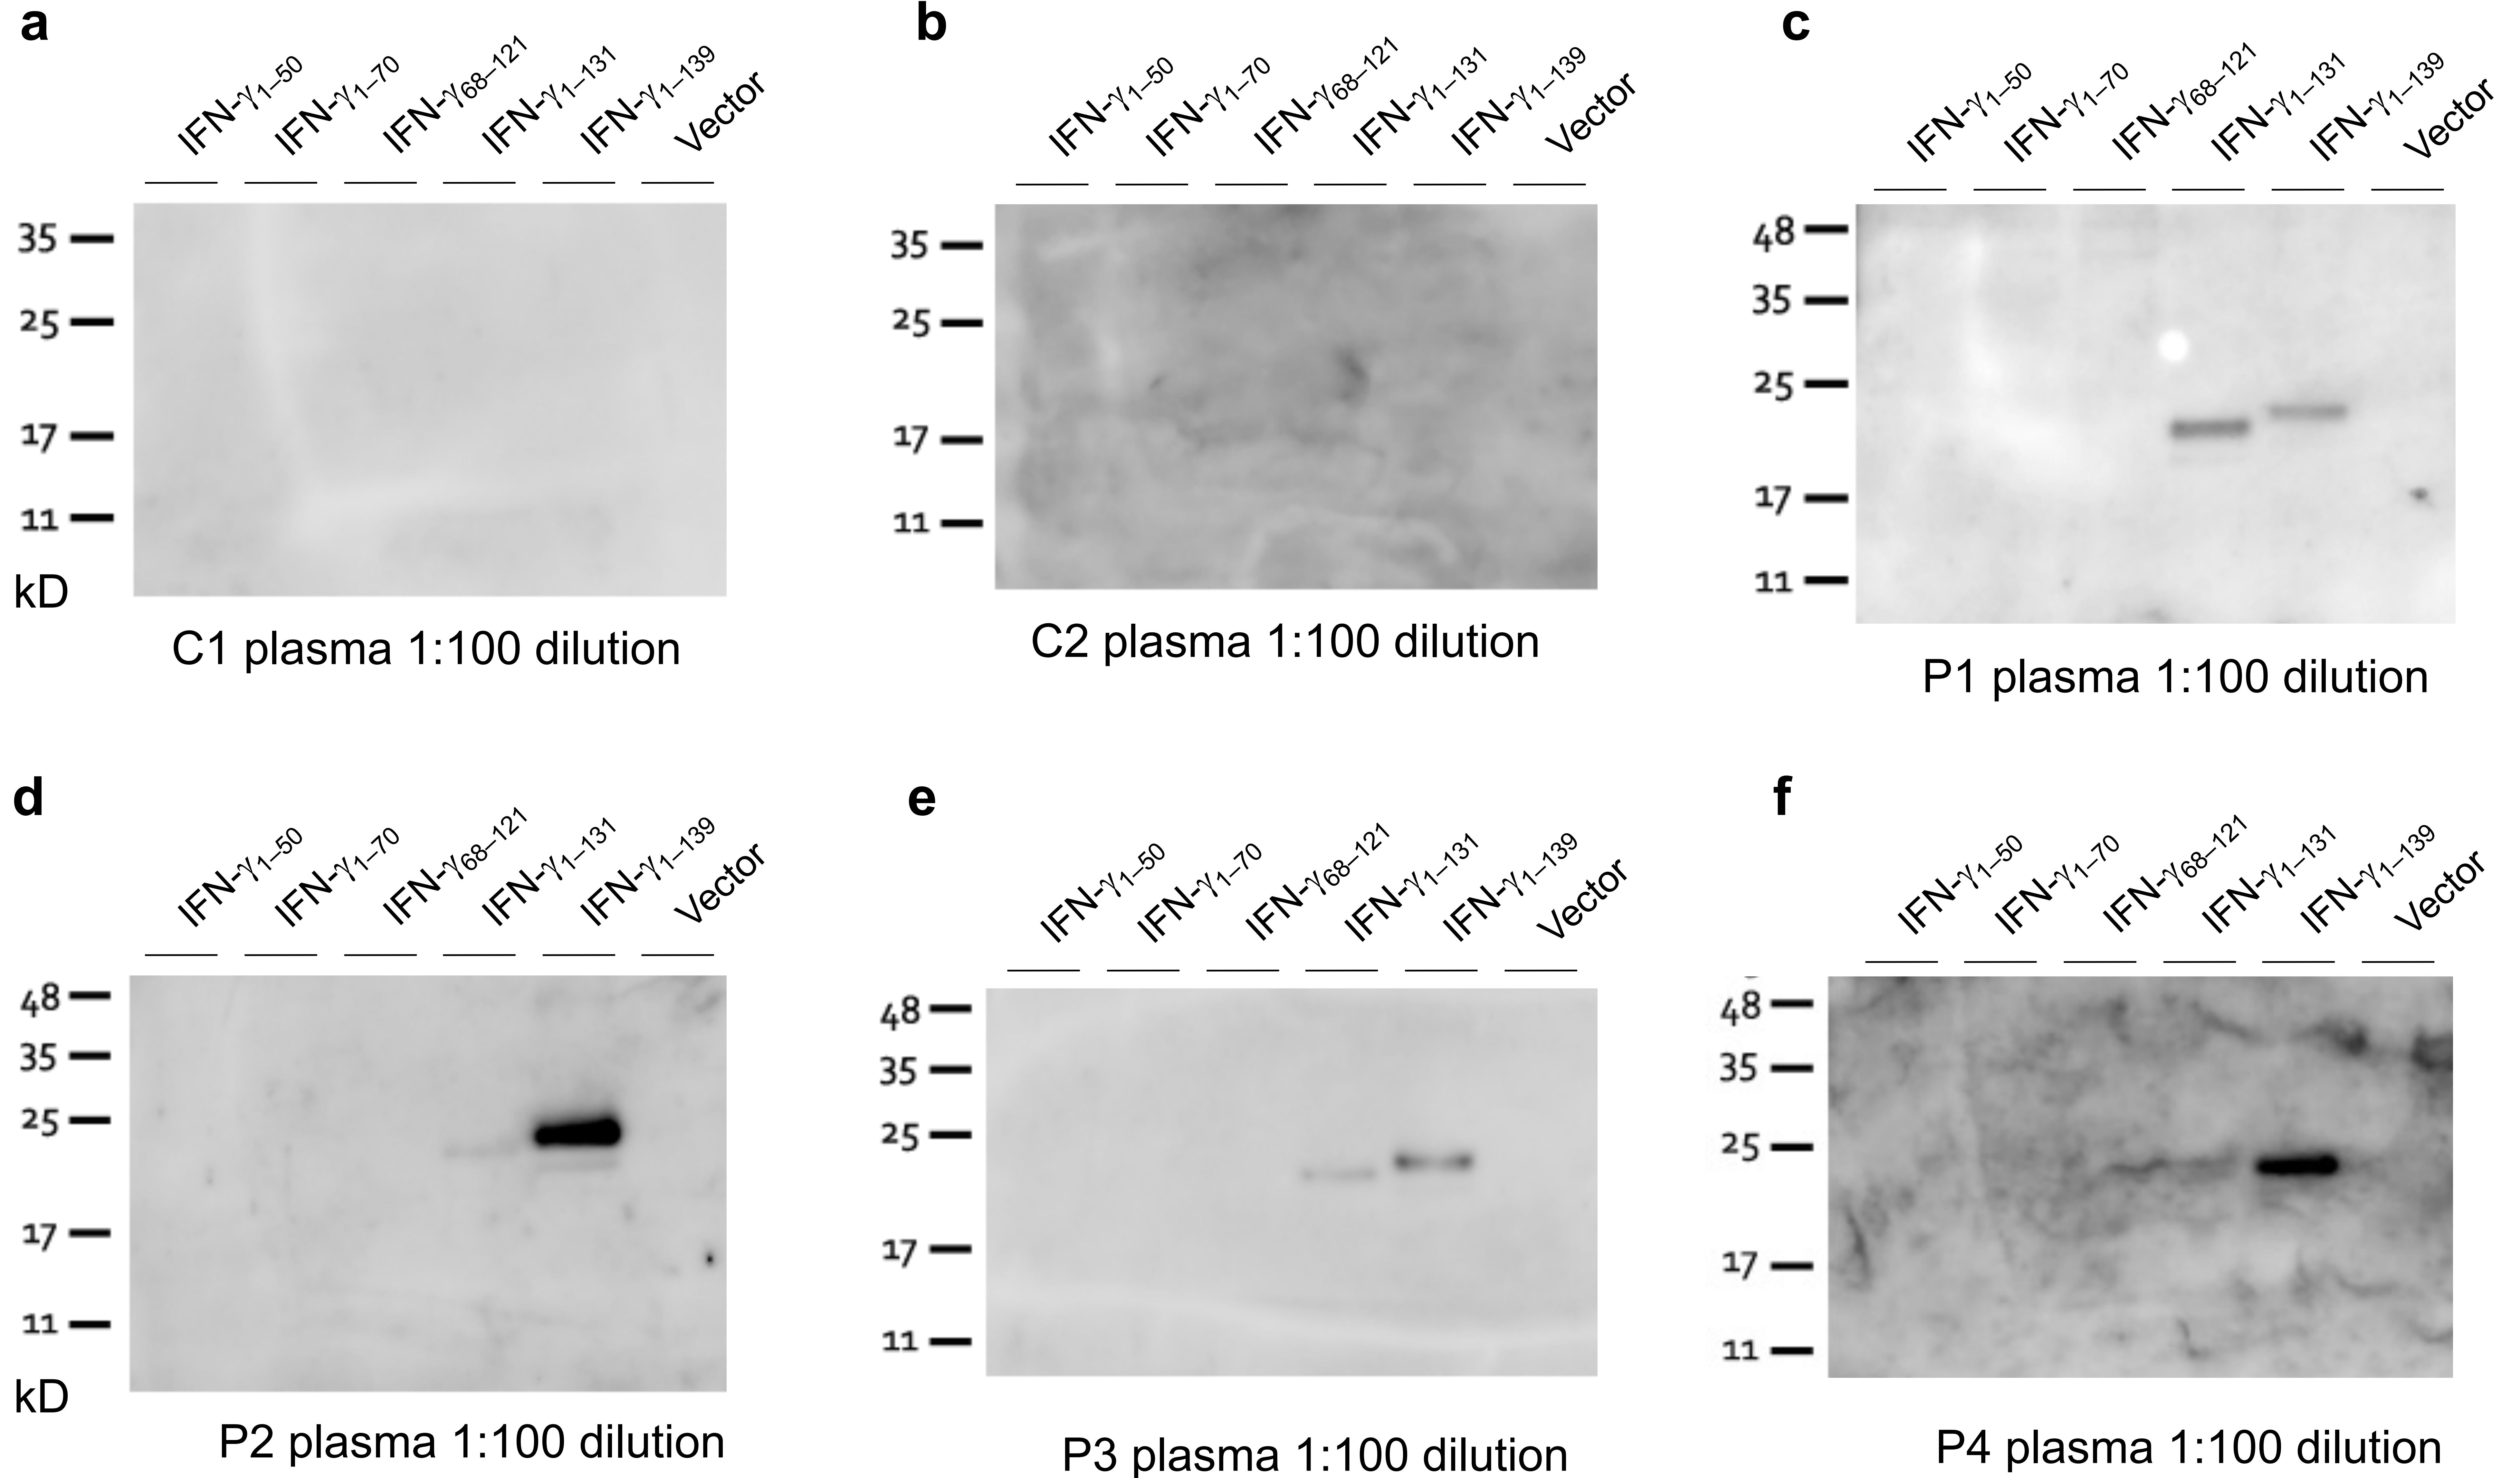

**Supplementary Figure 6. IFN- $\gamma_{1-139}$  and IFN- $\gamma_{1-131}$  were recognized by anti-IFN- $\gamma$  AutoAbs, whereas other truncated IFN- $\gamma$  proteins were not.** Western blot showing the ability of plasma from randomly selected Controls ( $n = 2$ , C1 and C2) (**a** and **b**) and IFN- $\gamma$  AutoAbs Pts ( $n = 4$ , P1–4) (**c–f**) to bind various truncated forms of IFN- $\gamma$ . Results from a representative experiment are shown. Similar results were obtained in at least three replicated experiments.

Supplementary Figure 7

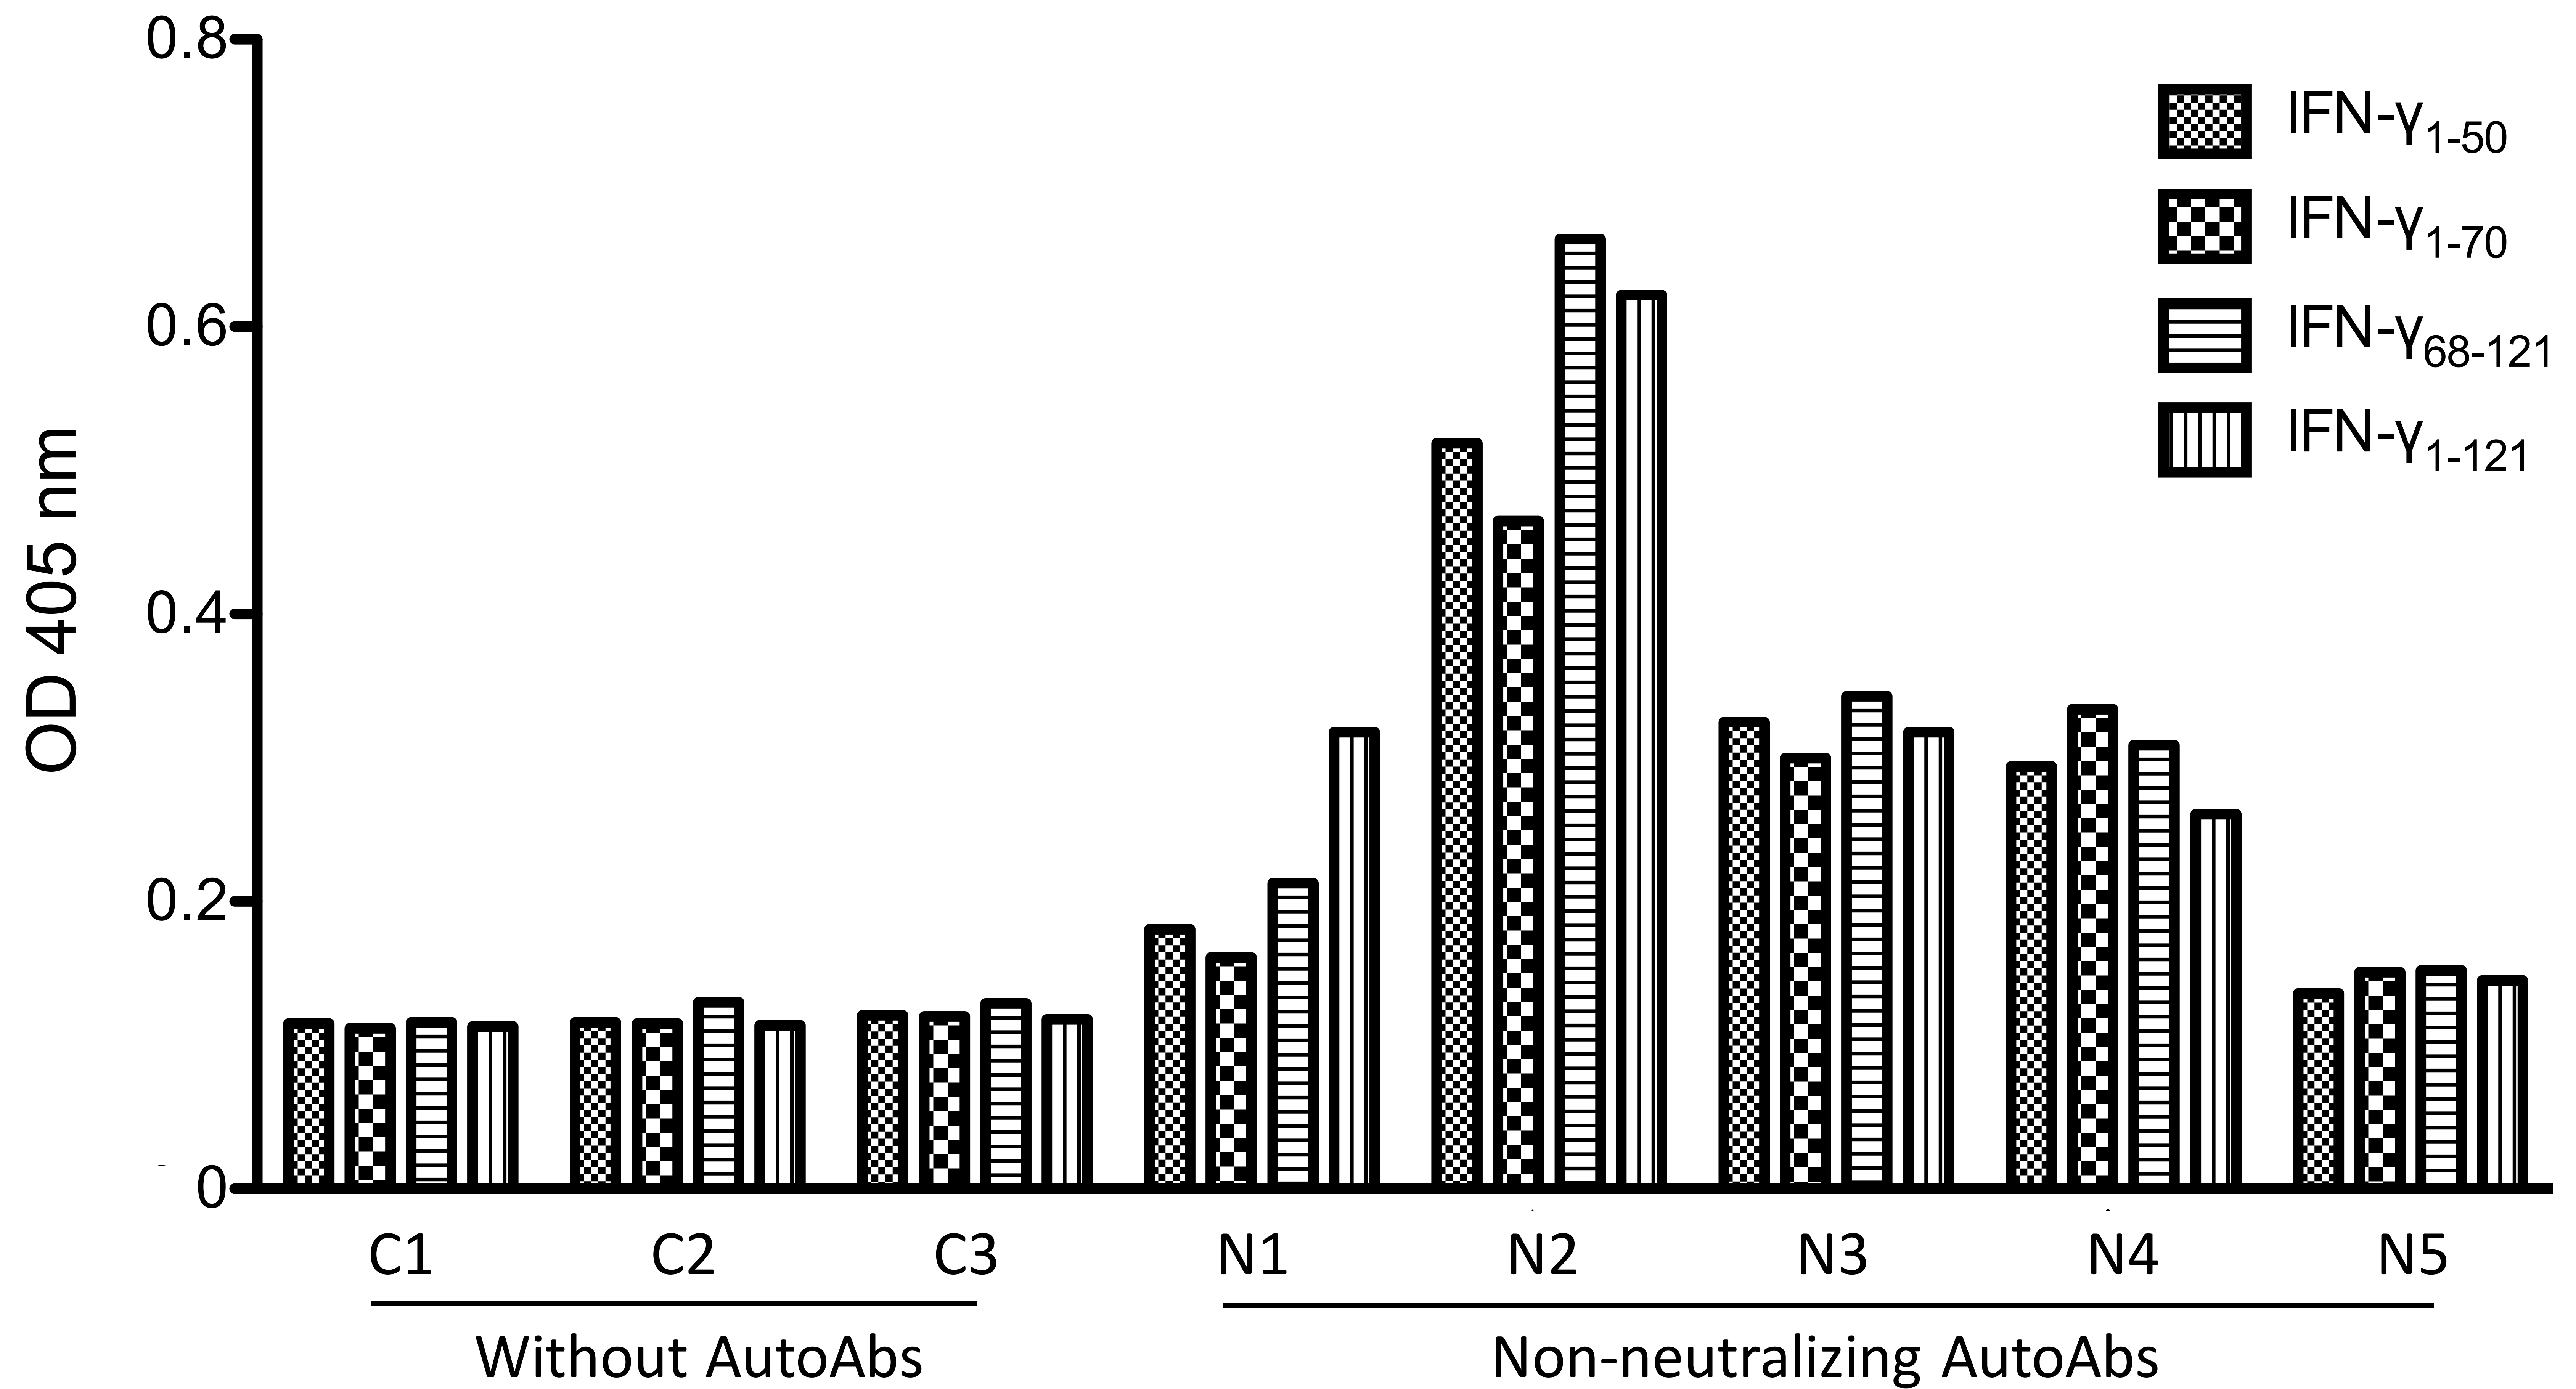

**Supplementary Figure 7. Non-neutralizing AutoAbs recognized IFN- $\gamma_{1-50}$ , IFN- $\gamma_{1-70}$ , IFN- $\gamma_{68-121}$  and IFN- $\gamma_{1-121}$ .** Protein mapping was used to assess the affinity of binding of the recombinant proteins to IFN- $\gamma$  in plasma, presented as the mean optical density (OD) at 405 nm; the plasma samples used were from healthy controls without AutoAbs ( $n = 3$ , C1–3), and healthy controls with non-neutralizing IFN- $\gamma$  AutoAbs ( $n = 5$ , N1–5).

Supplementary Figure 8

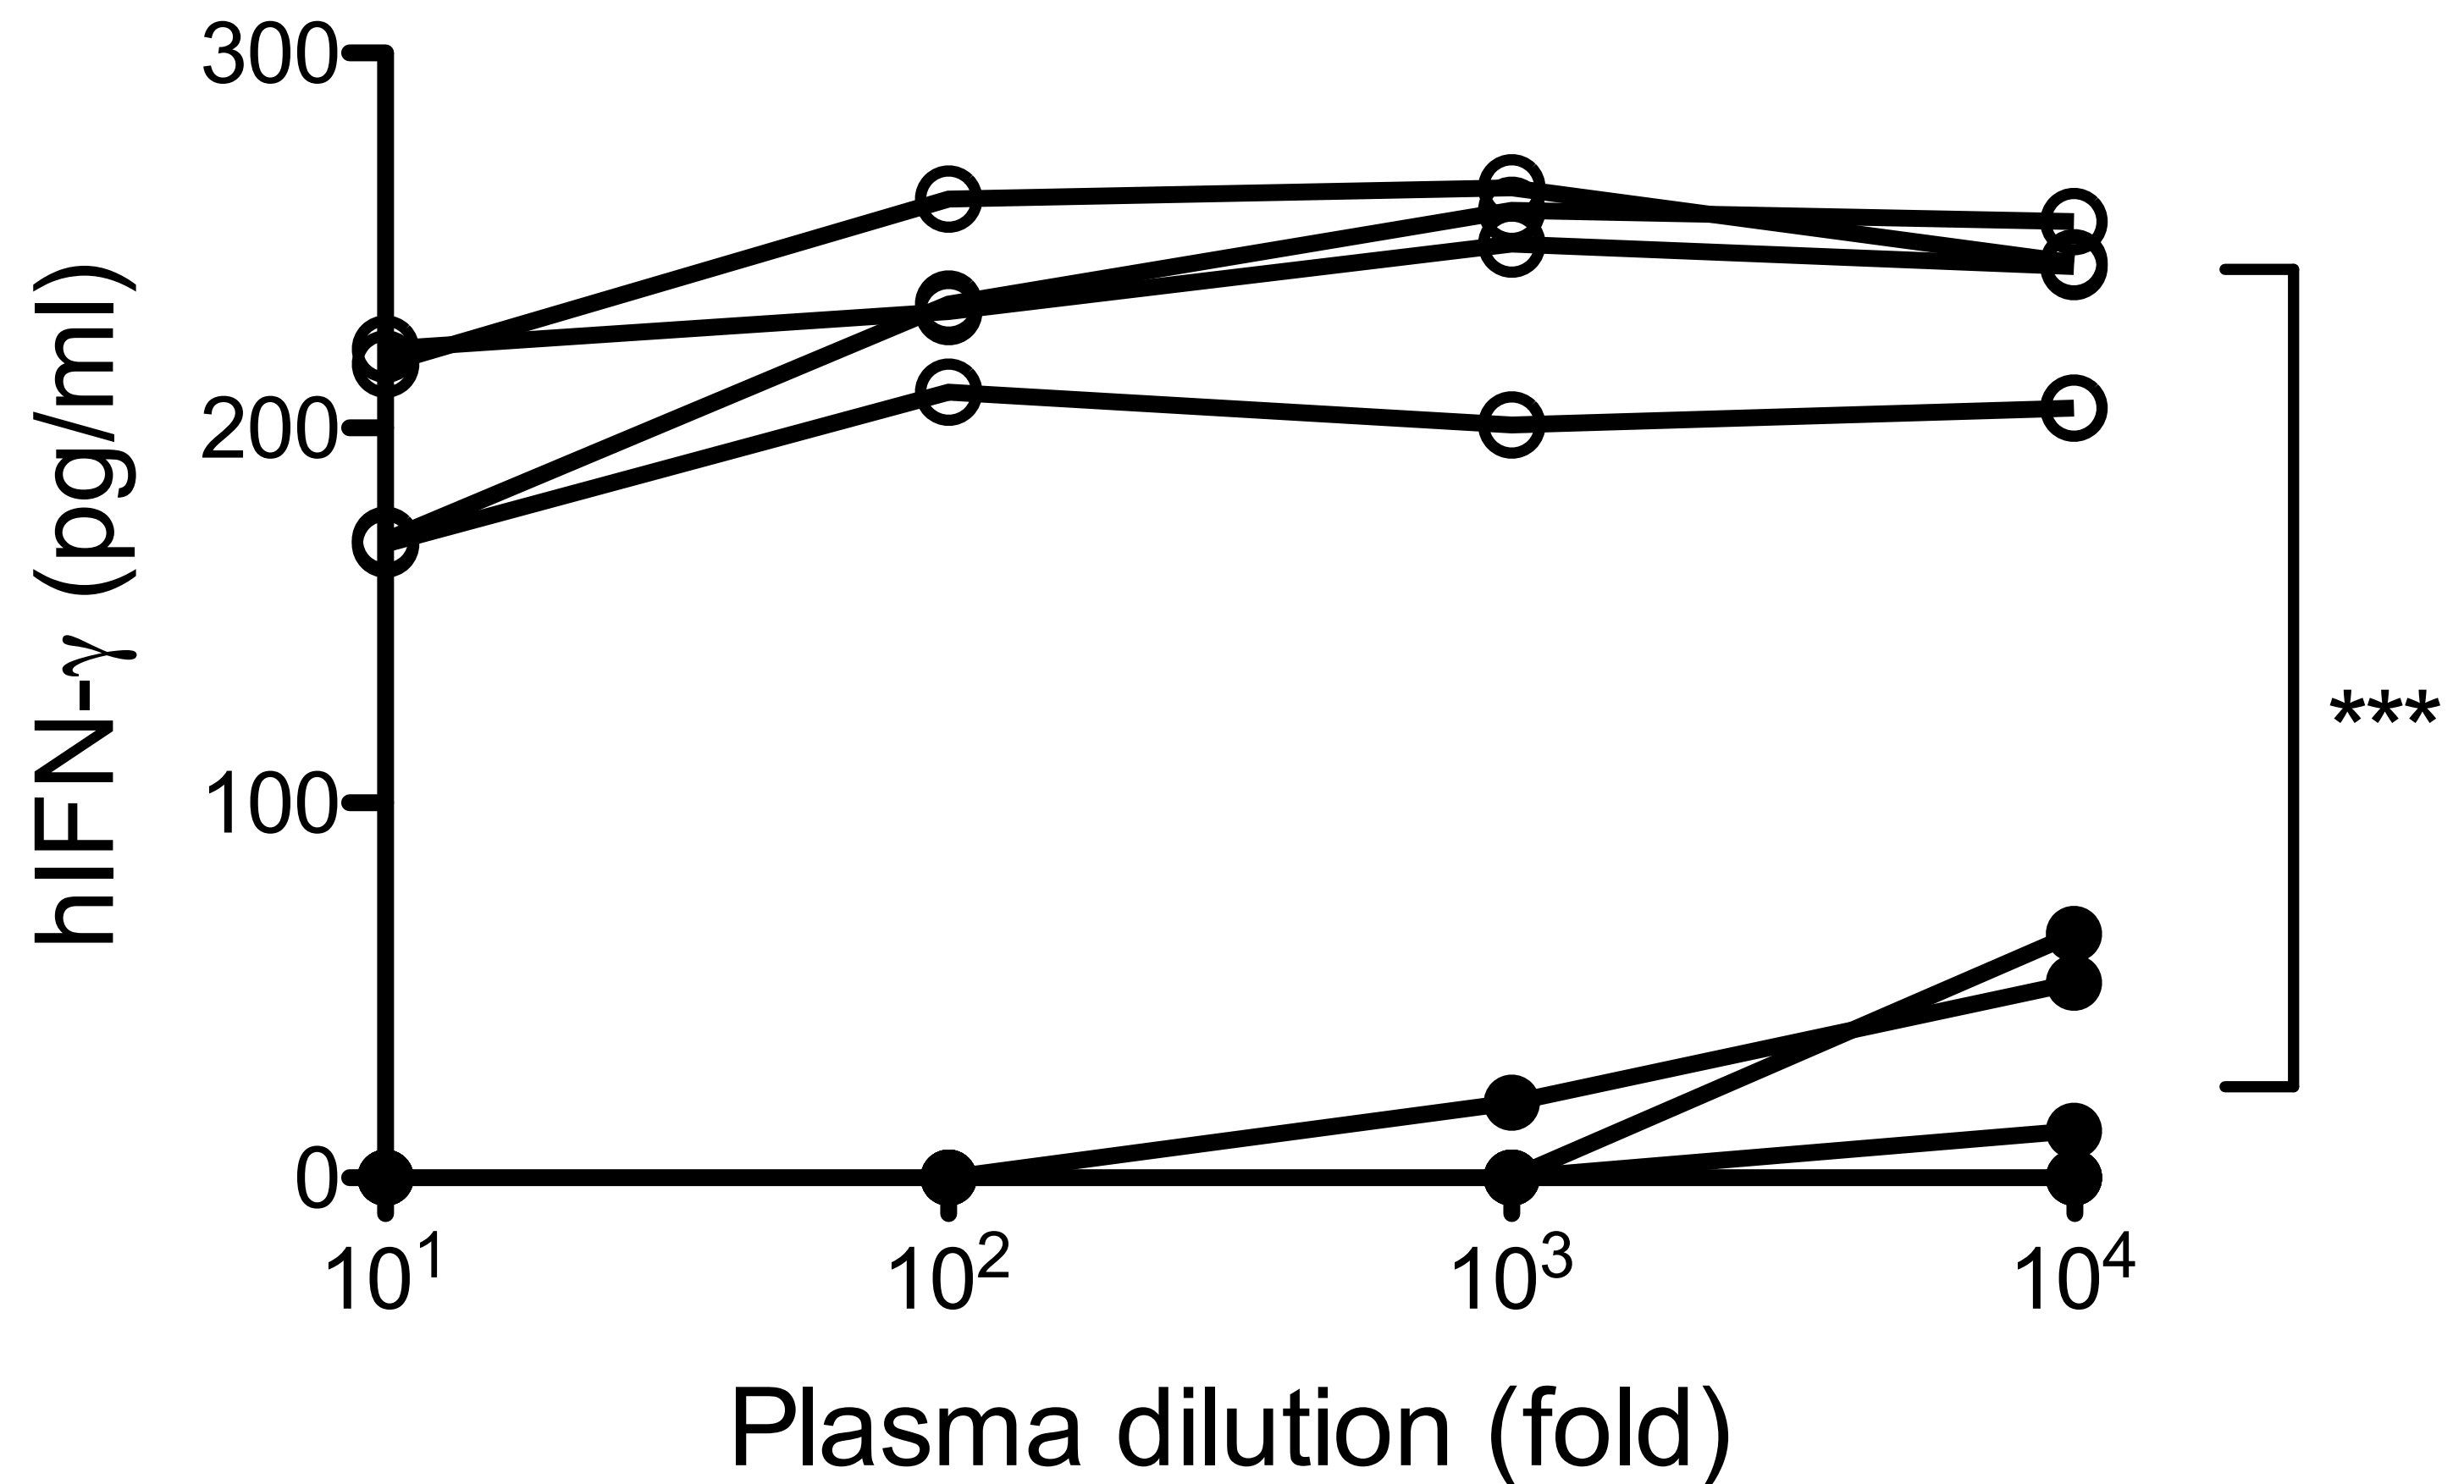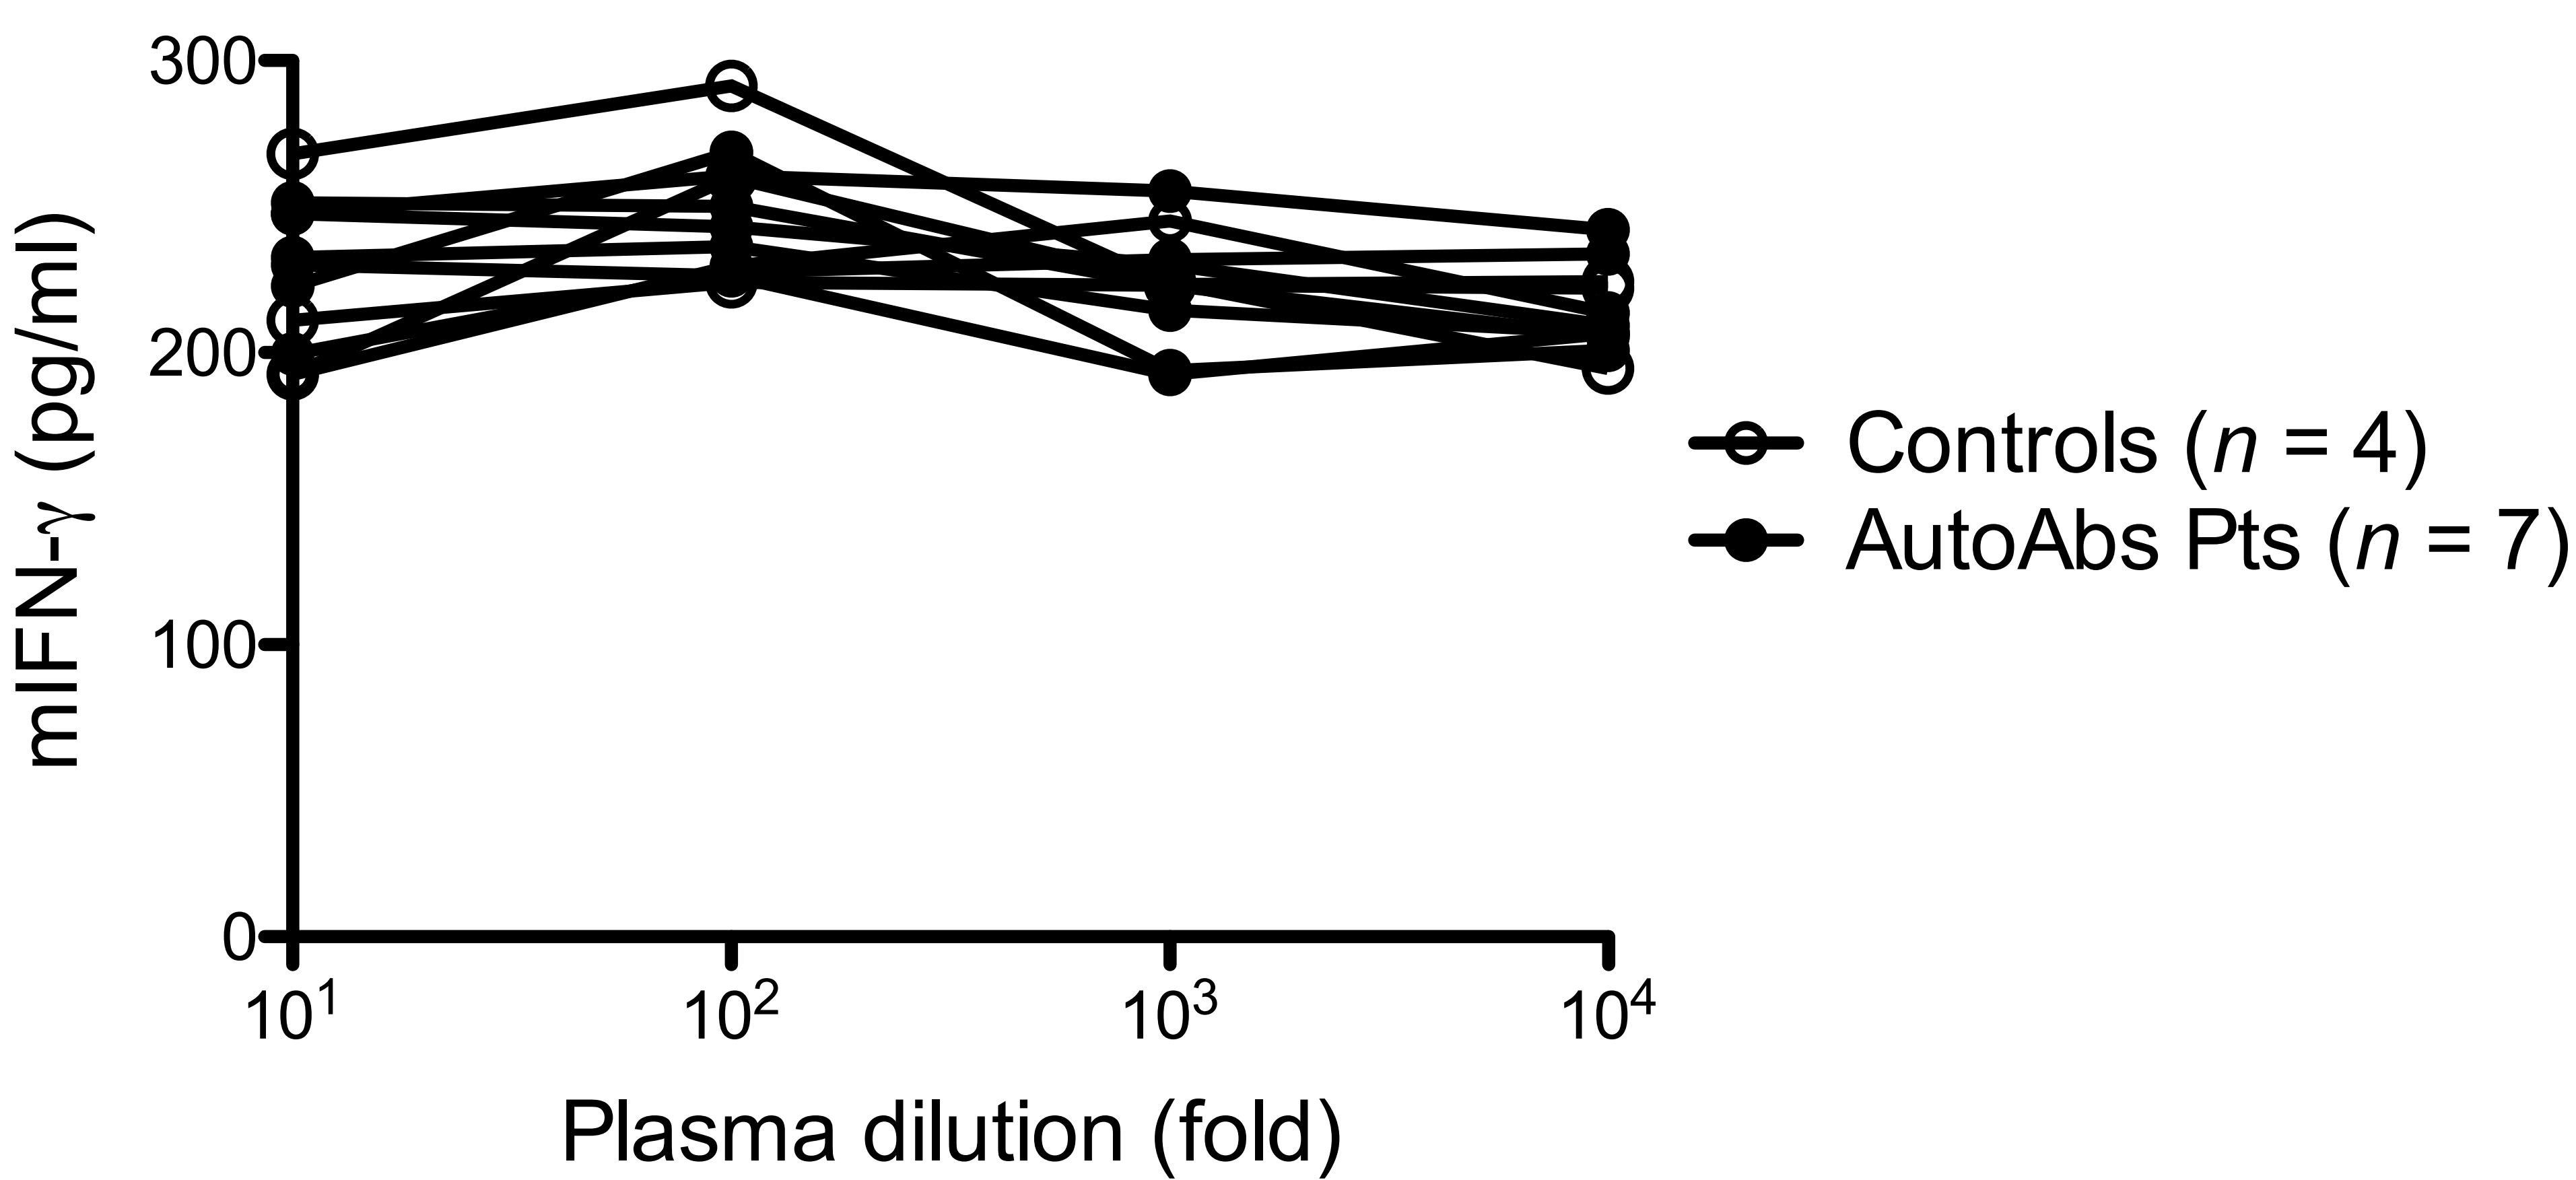

**Supplementary Figure 8. Plasma samples from patients with anti-IFN- $\gamma$  AutoAbs were unable to bind mouse IFN- $\gamma$ .** Seven plasma samples from randomly selected patients were serially diluted and incubated with 200 pg/mL human IFN- $\gamma$  (hIFN- $\gamma$ ) or murine IFN- $\gamma$  (mIFN- $\gamma$ ). Plasma from healthy donors did not block the detection of hIFN- $\gamma$  or mIFN- $\gamma$ . However, plasma from patients with AutoAbs against IFN- $\gamma$  inhibited the detection of hIFN- $\gamma$  at dilutions of up to  $1/10^4$ , but did not block the detection of mIFN- $\gamma$ . \*\*\* $P < 0.001$  at plasma dilutions of  $1:10^{-1}$  to  $1:10^{-4}$  in one-way ANOVA with a post-hoc Tukey's test.



Supplementary Figure 9

**a**

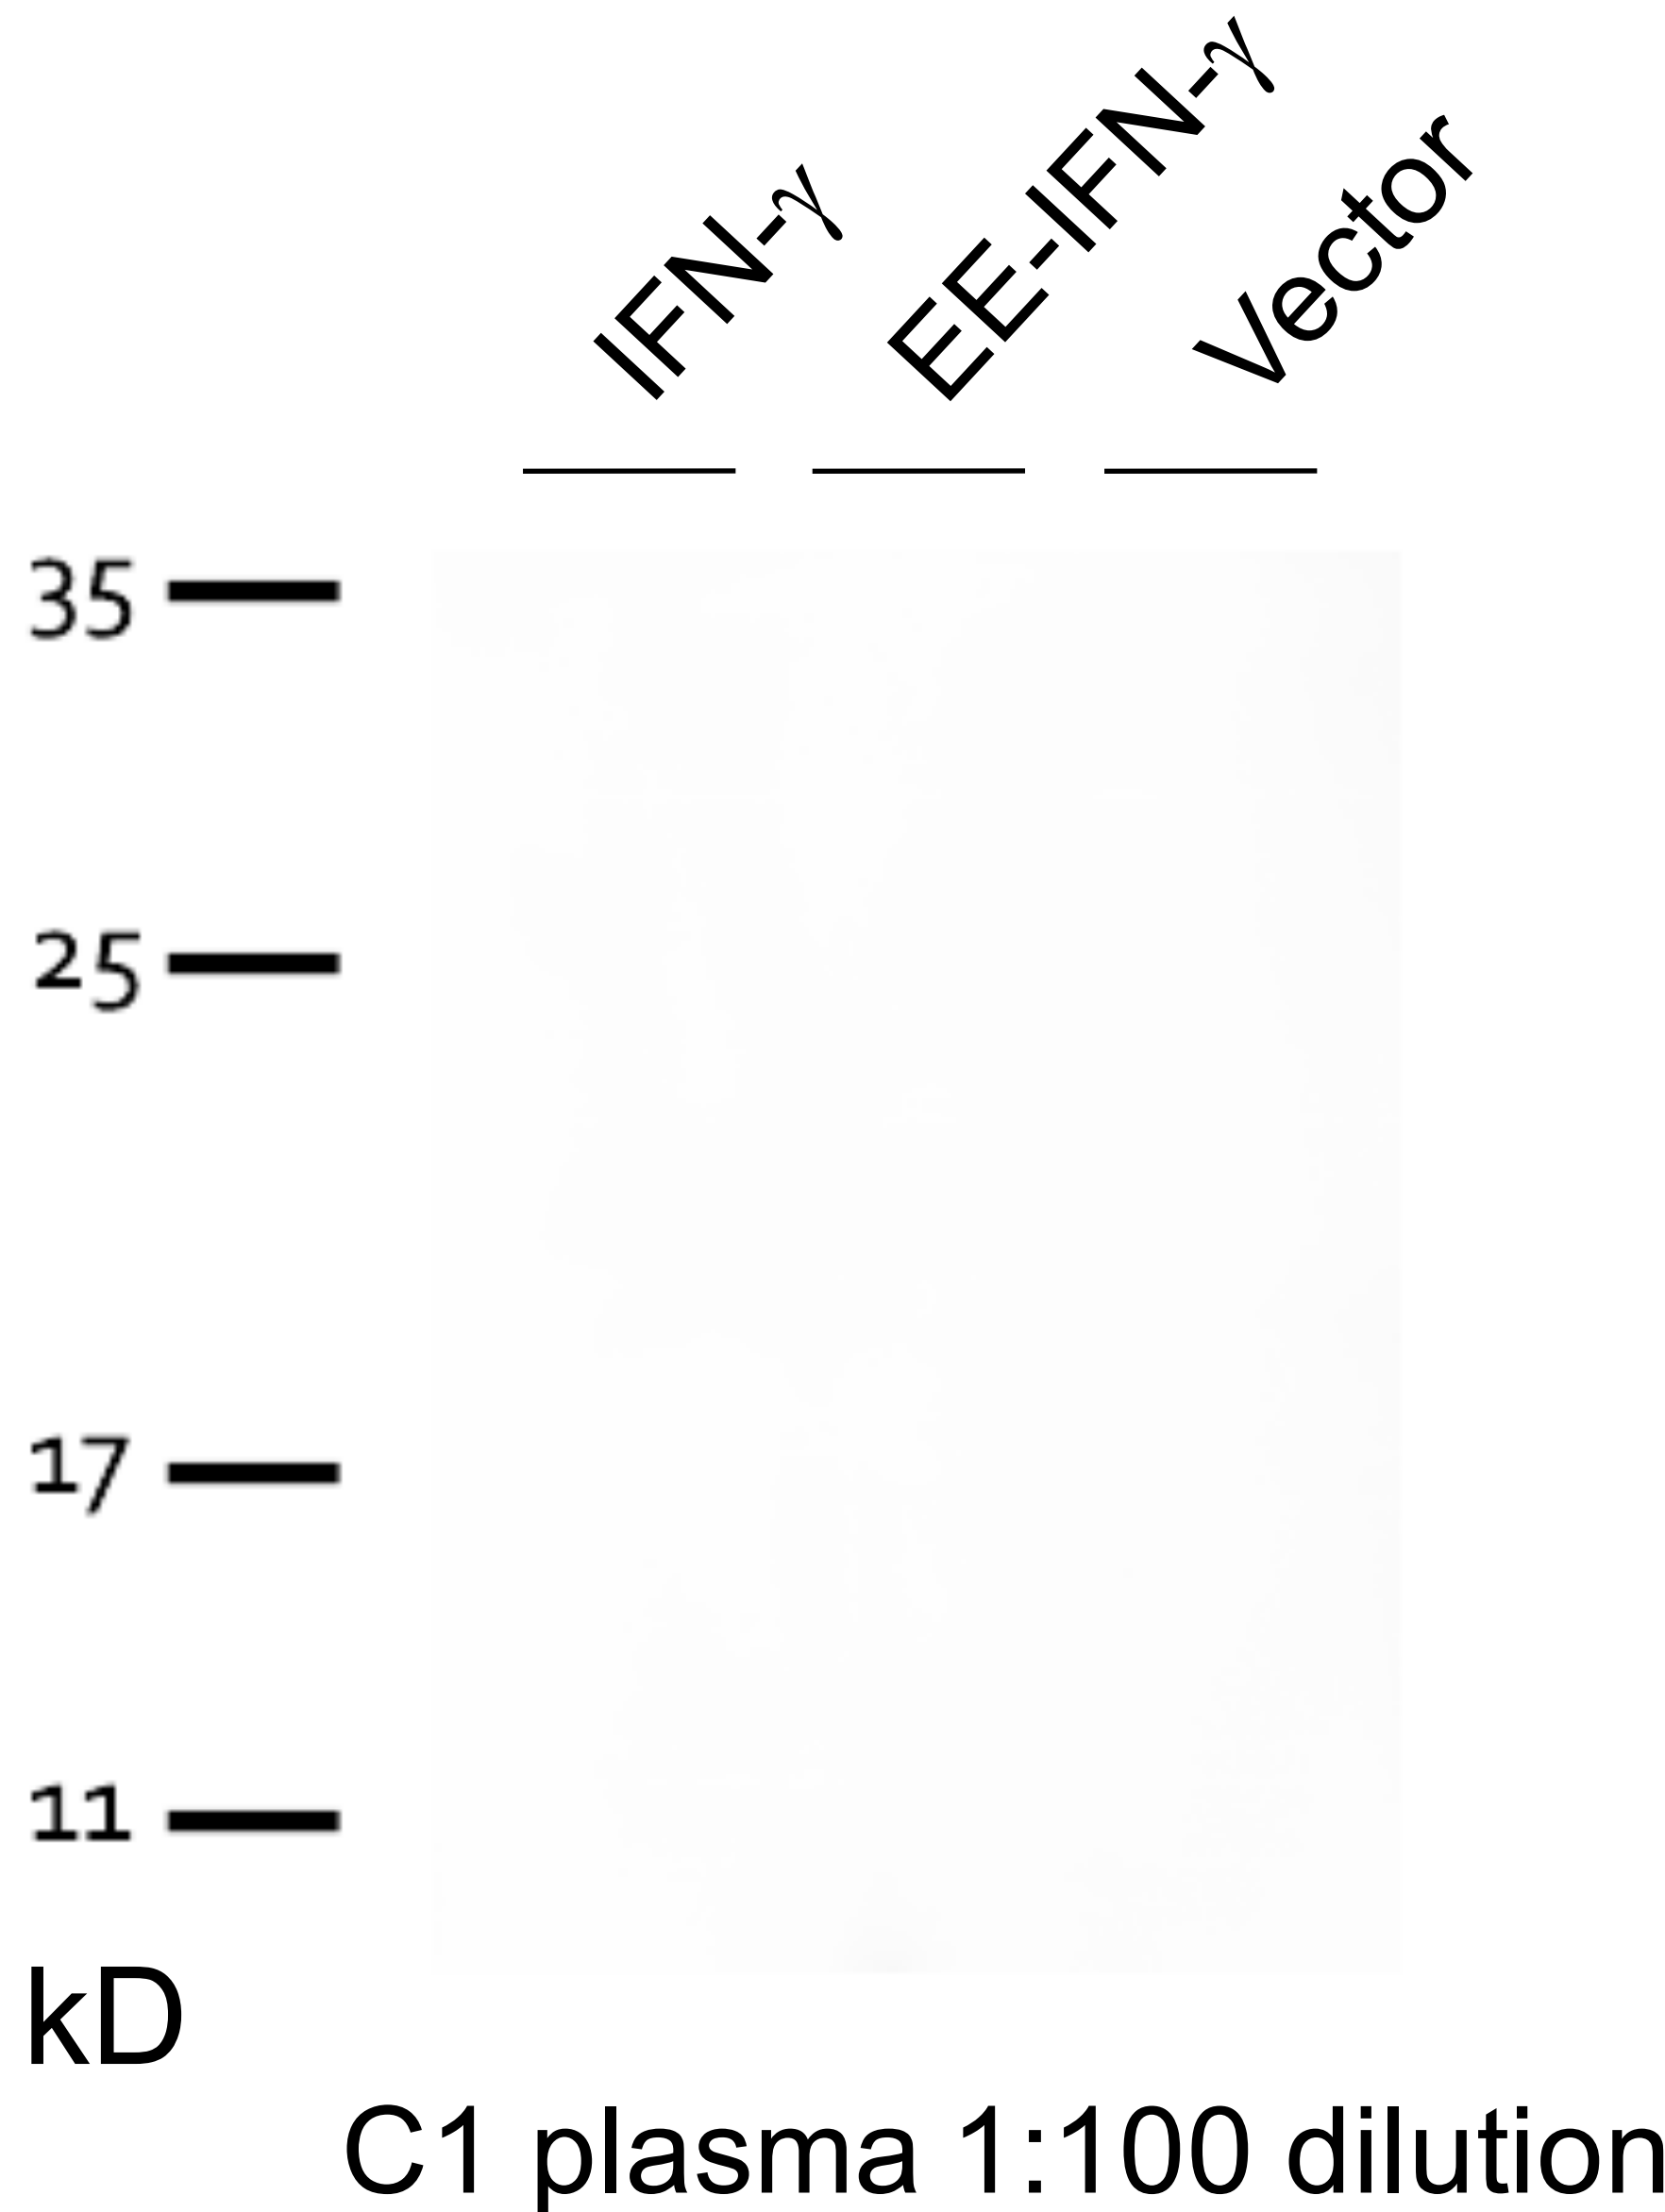

**b**

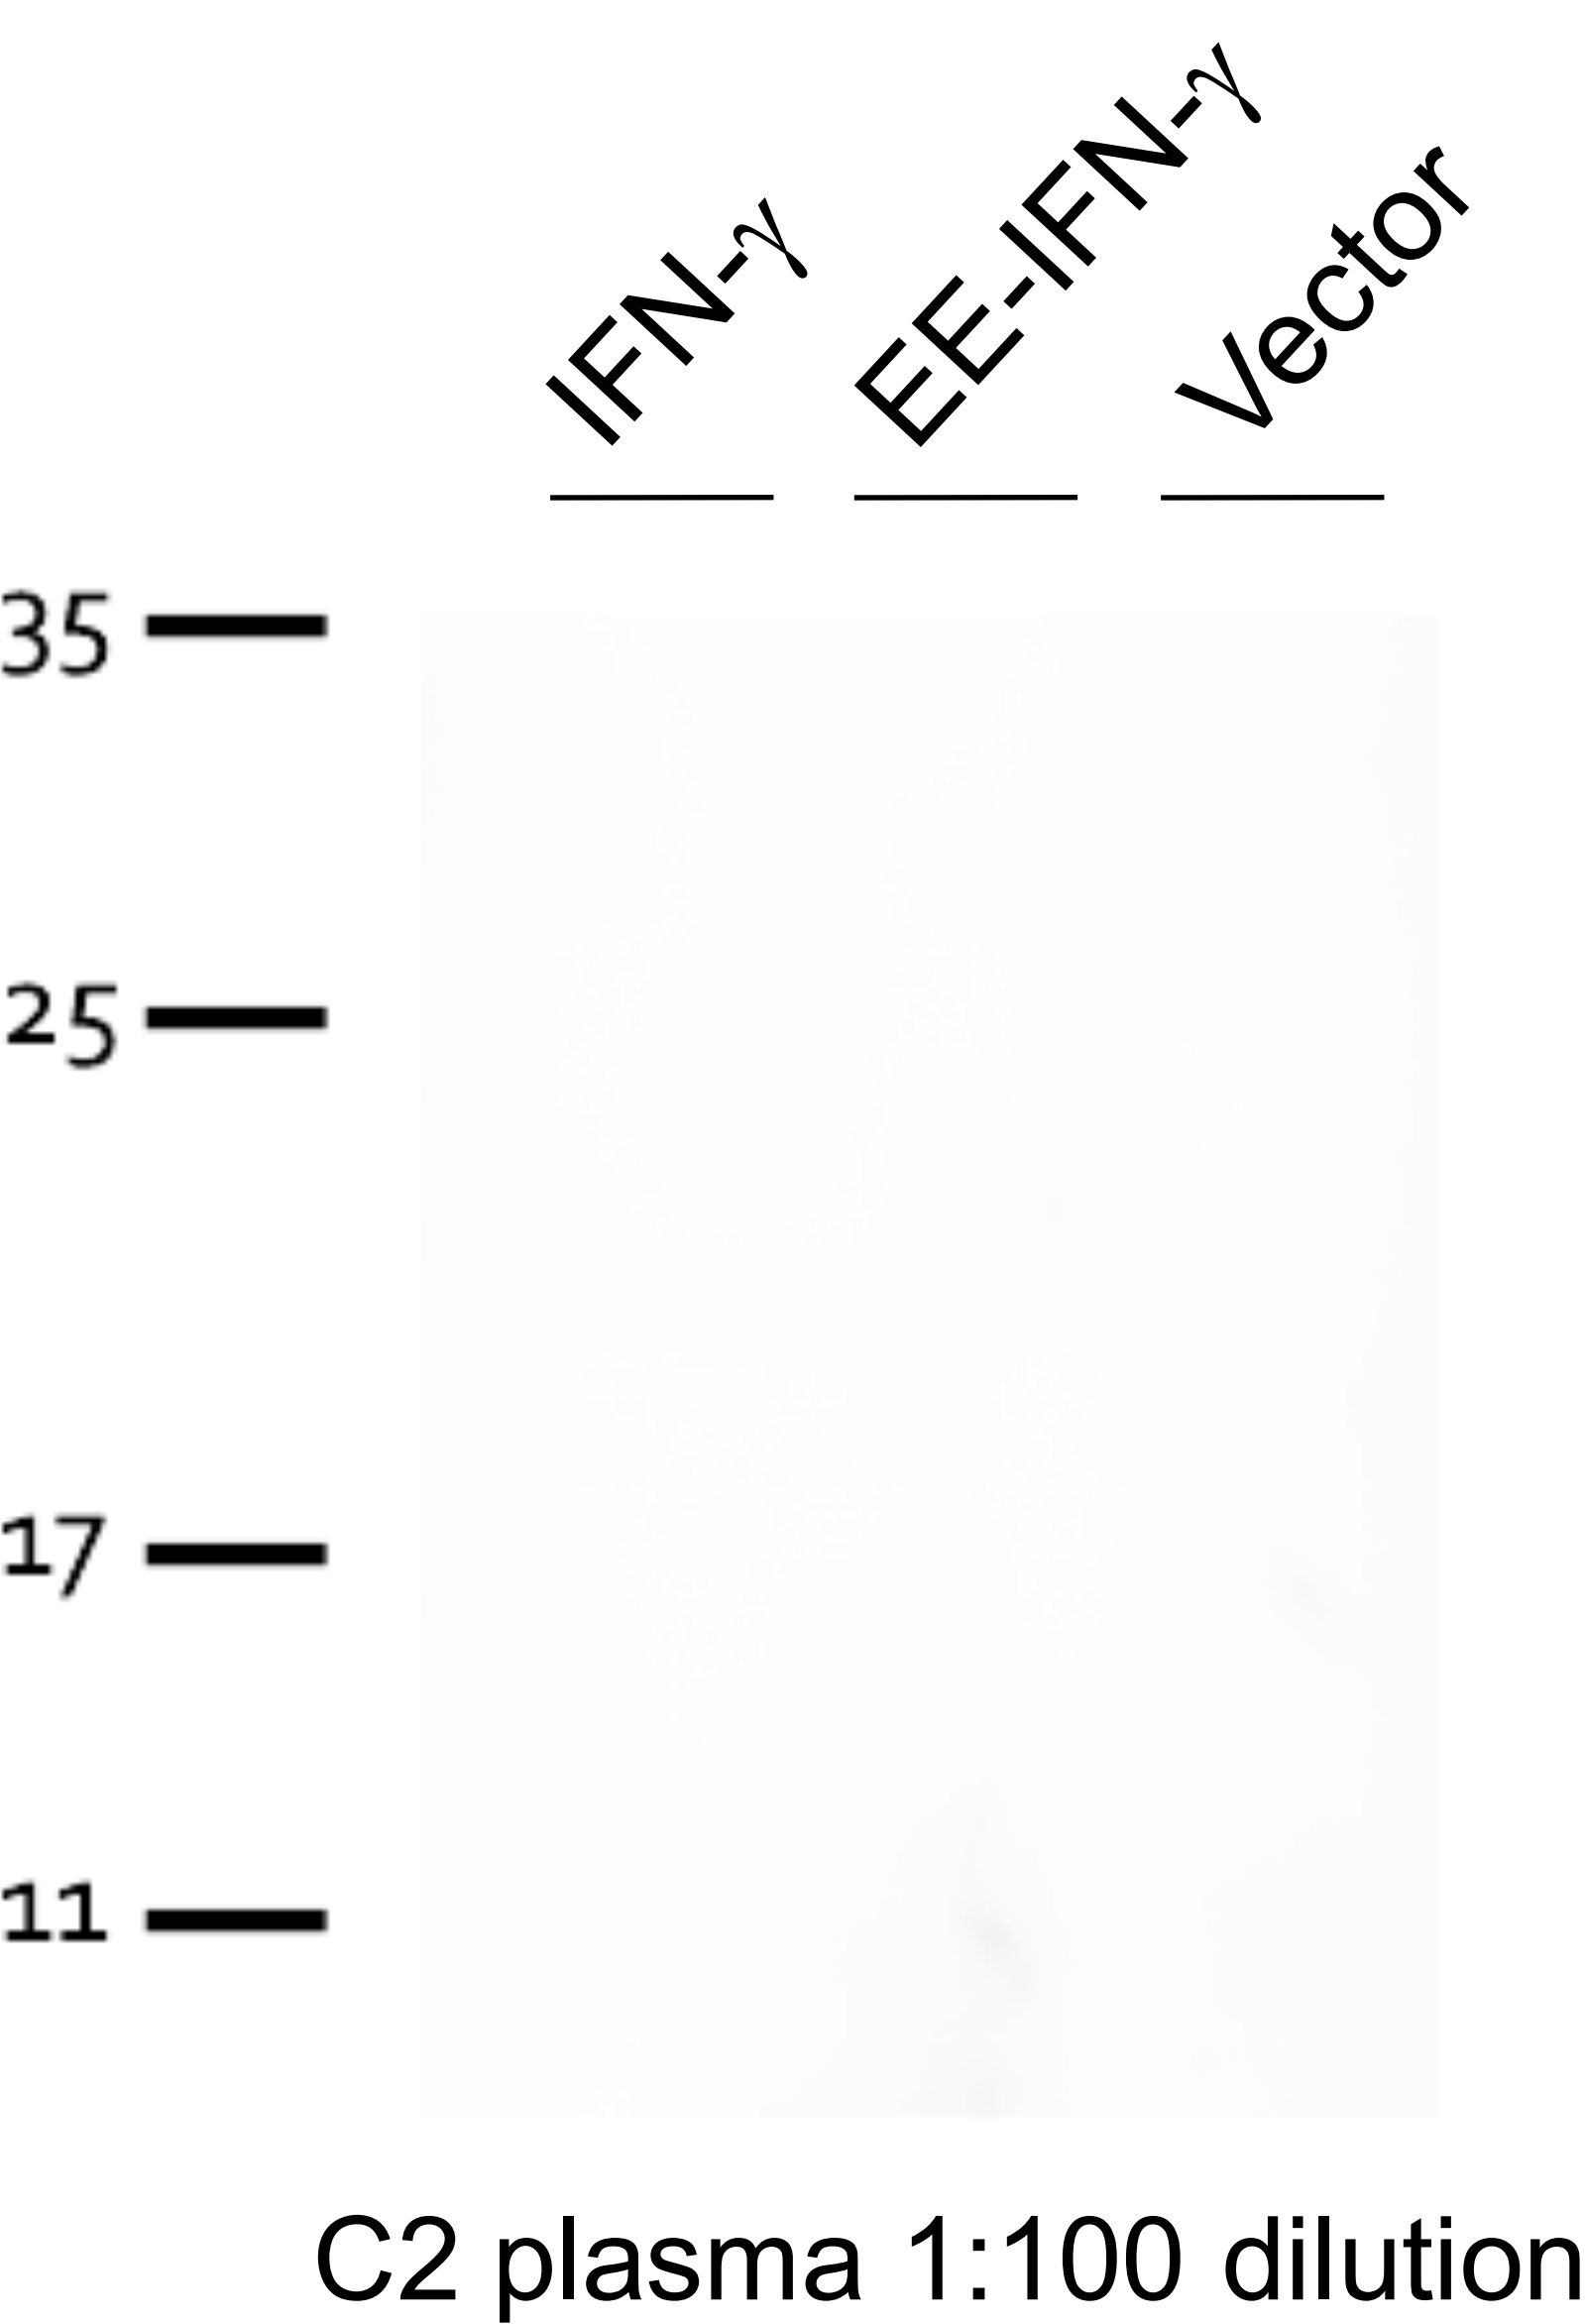

**c**

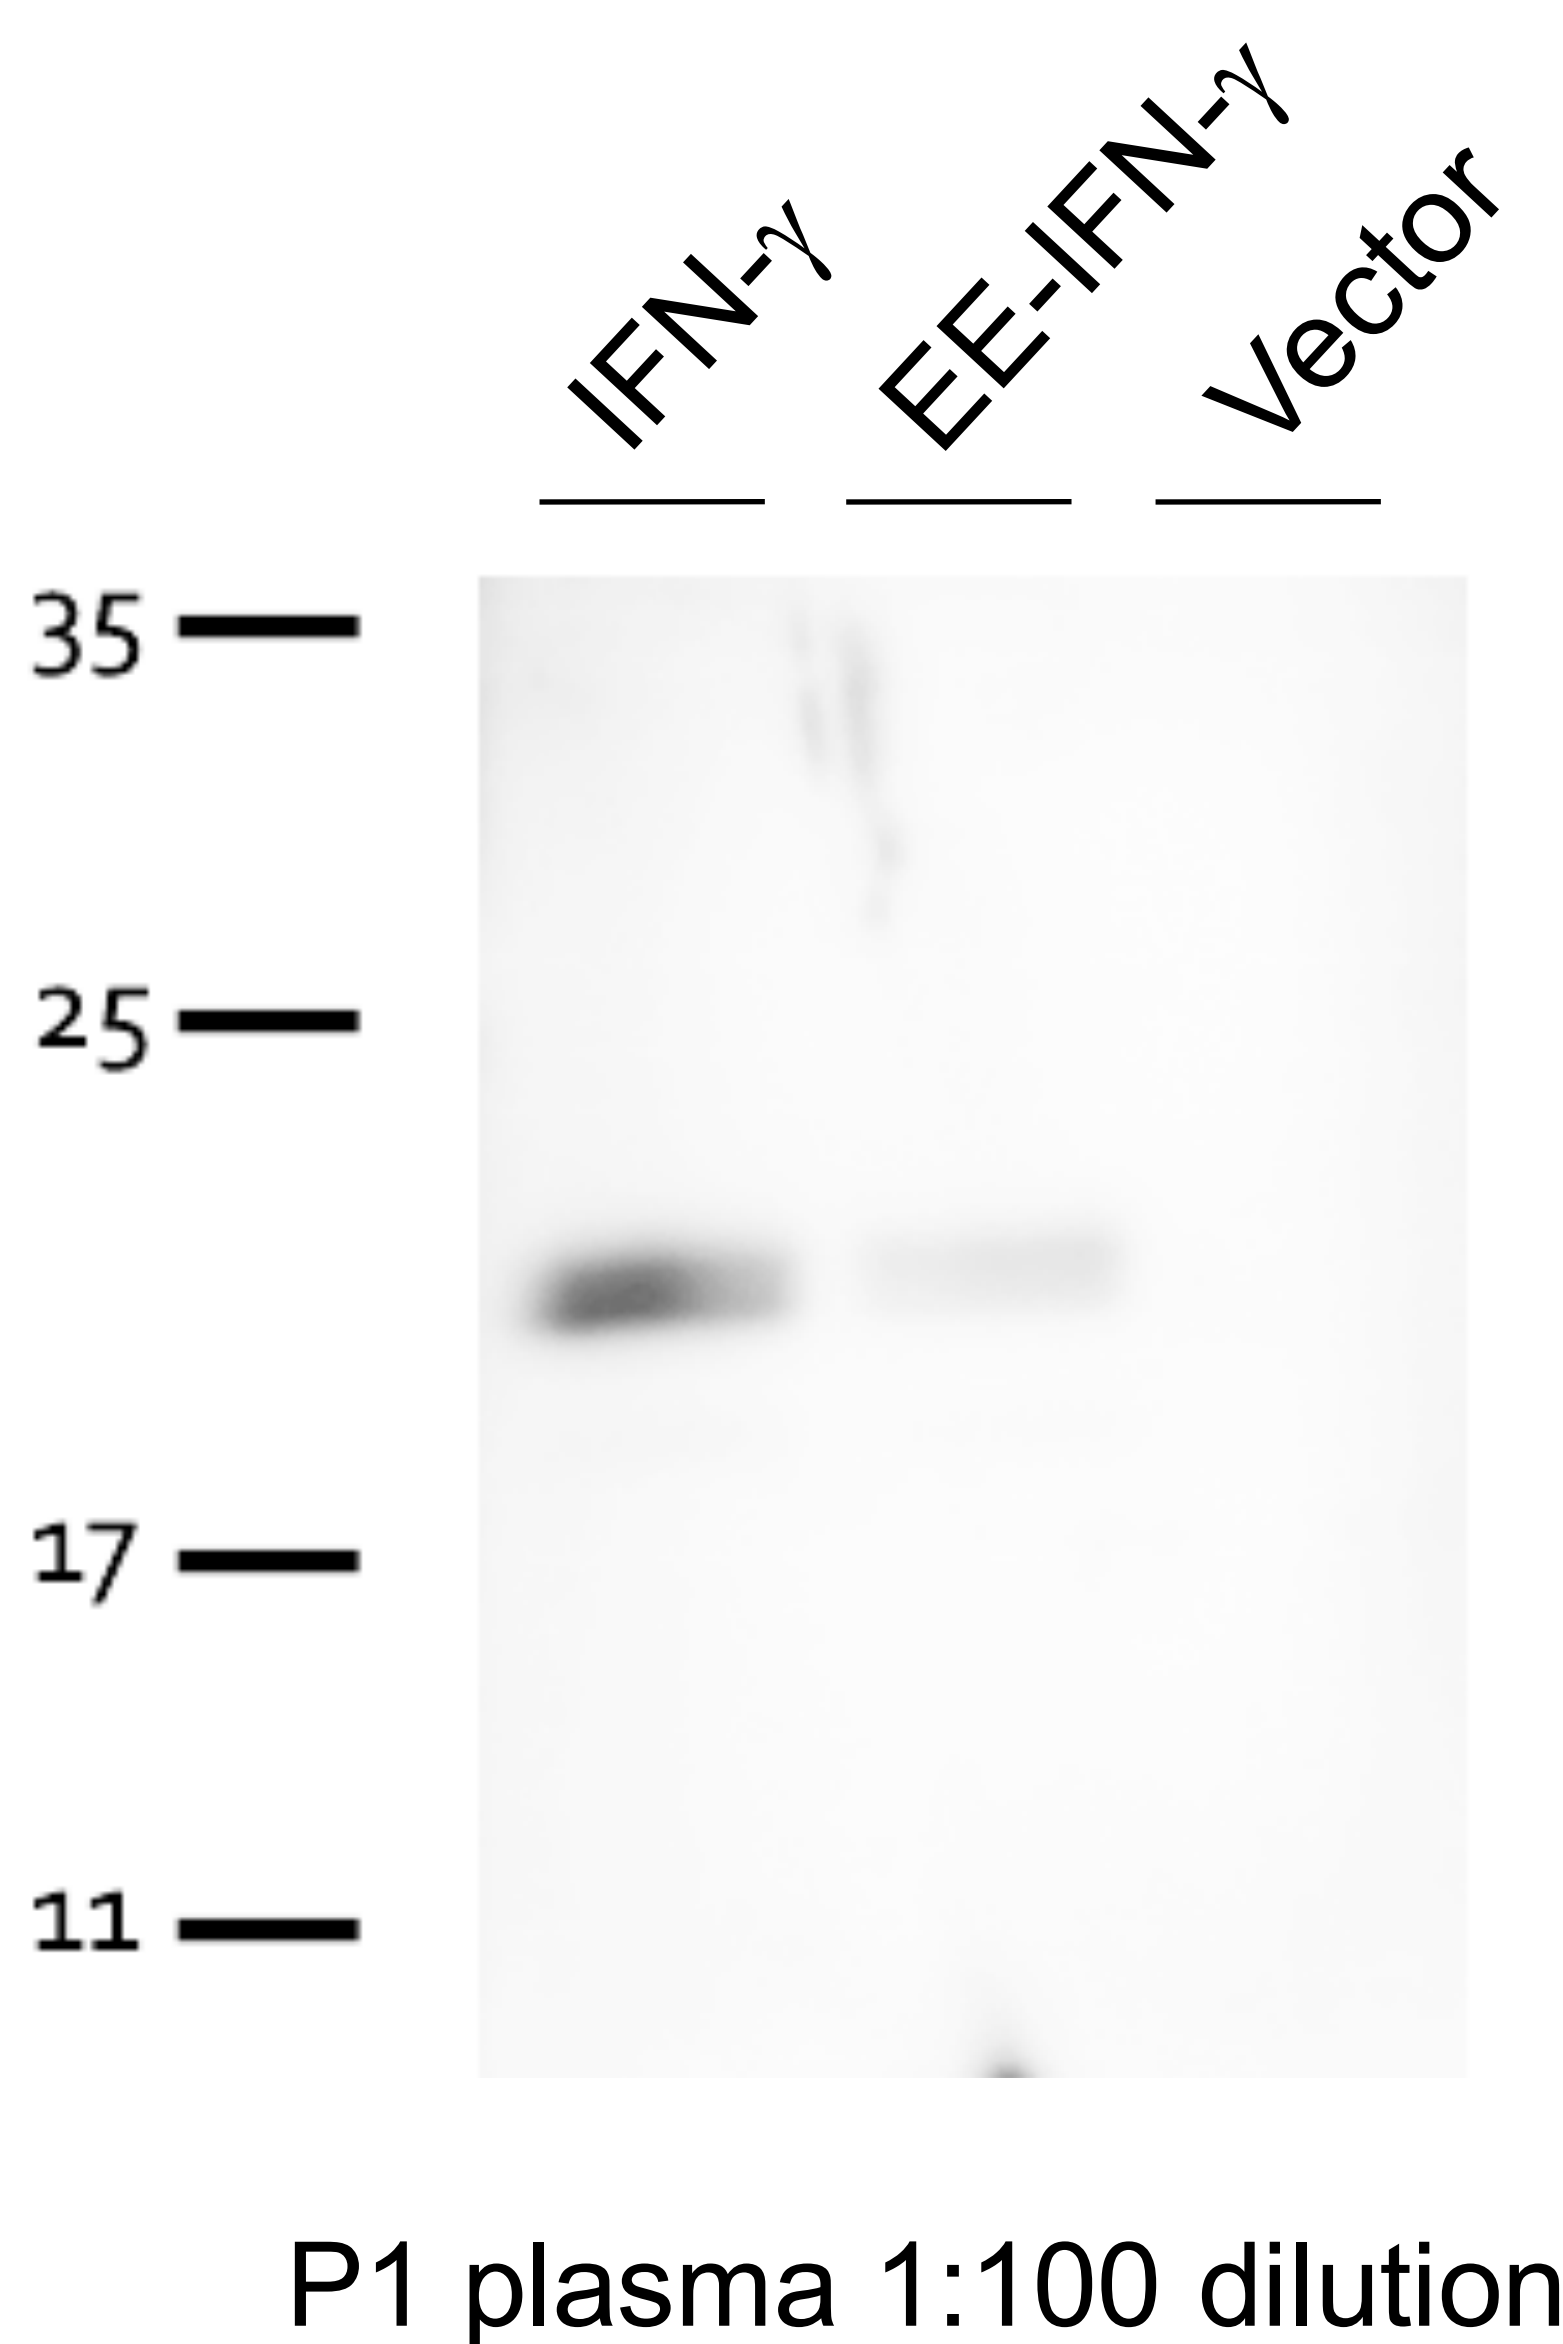

**d**

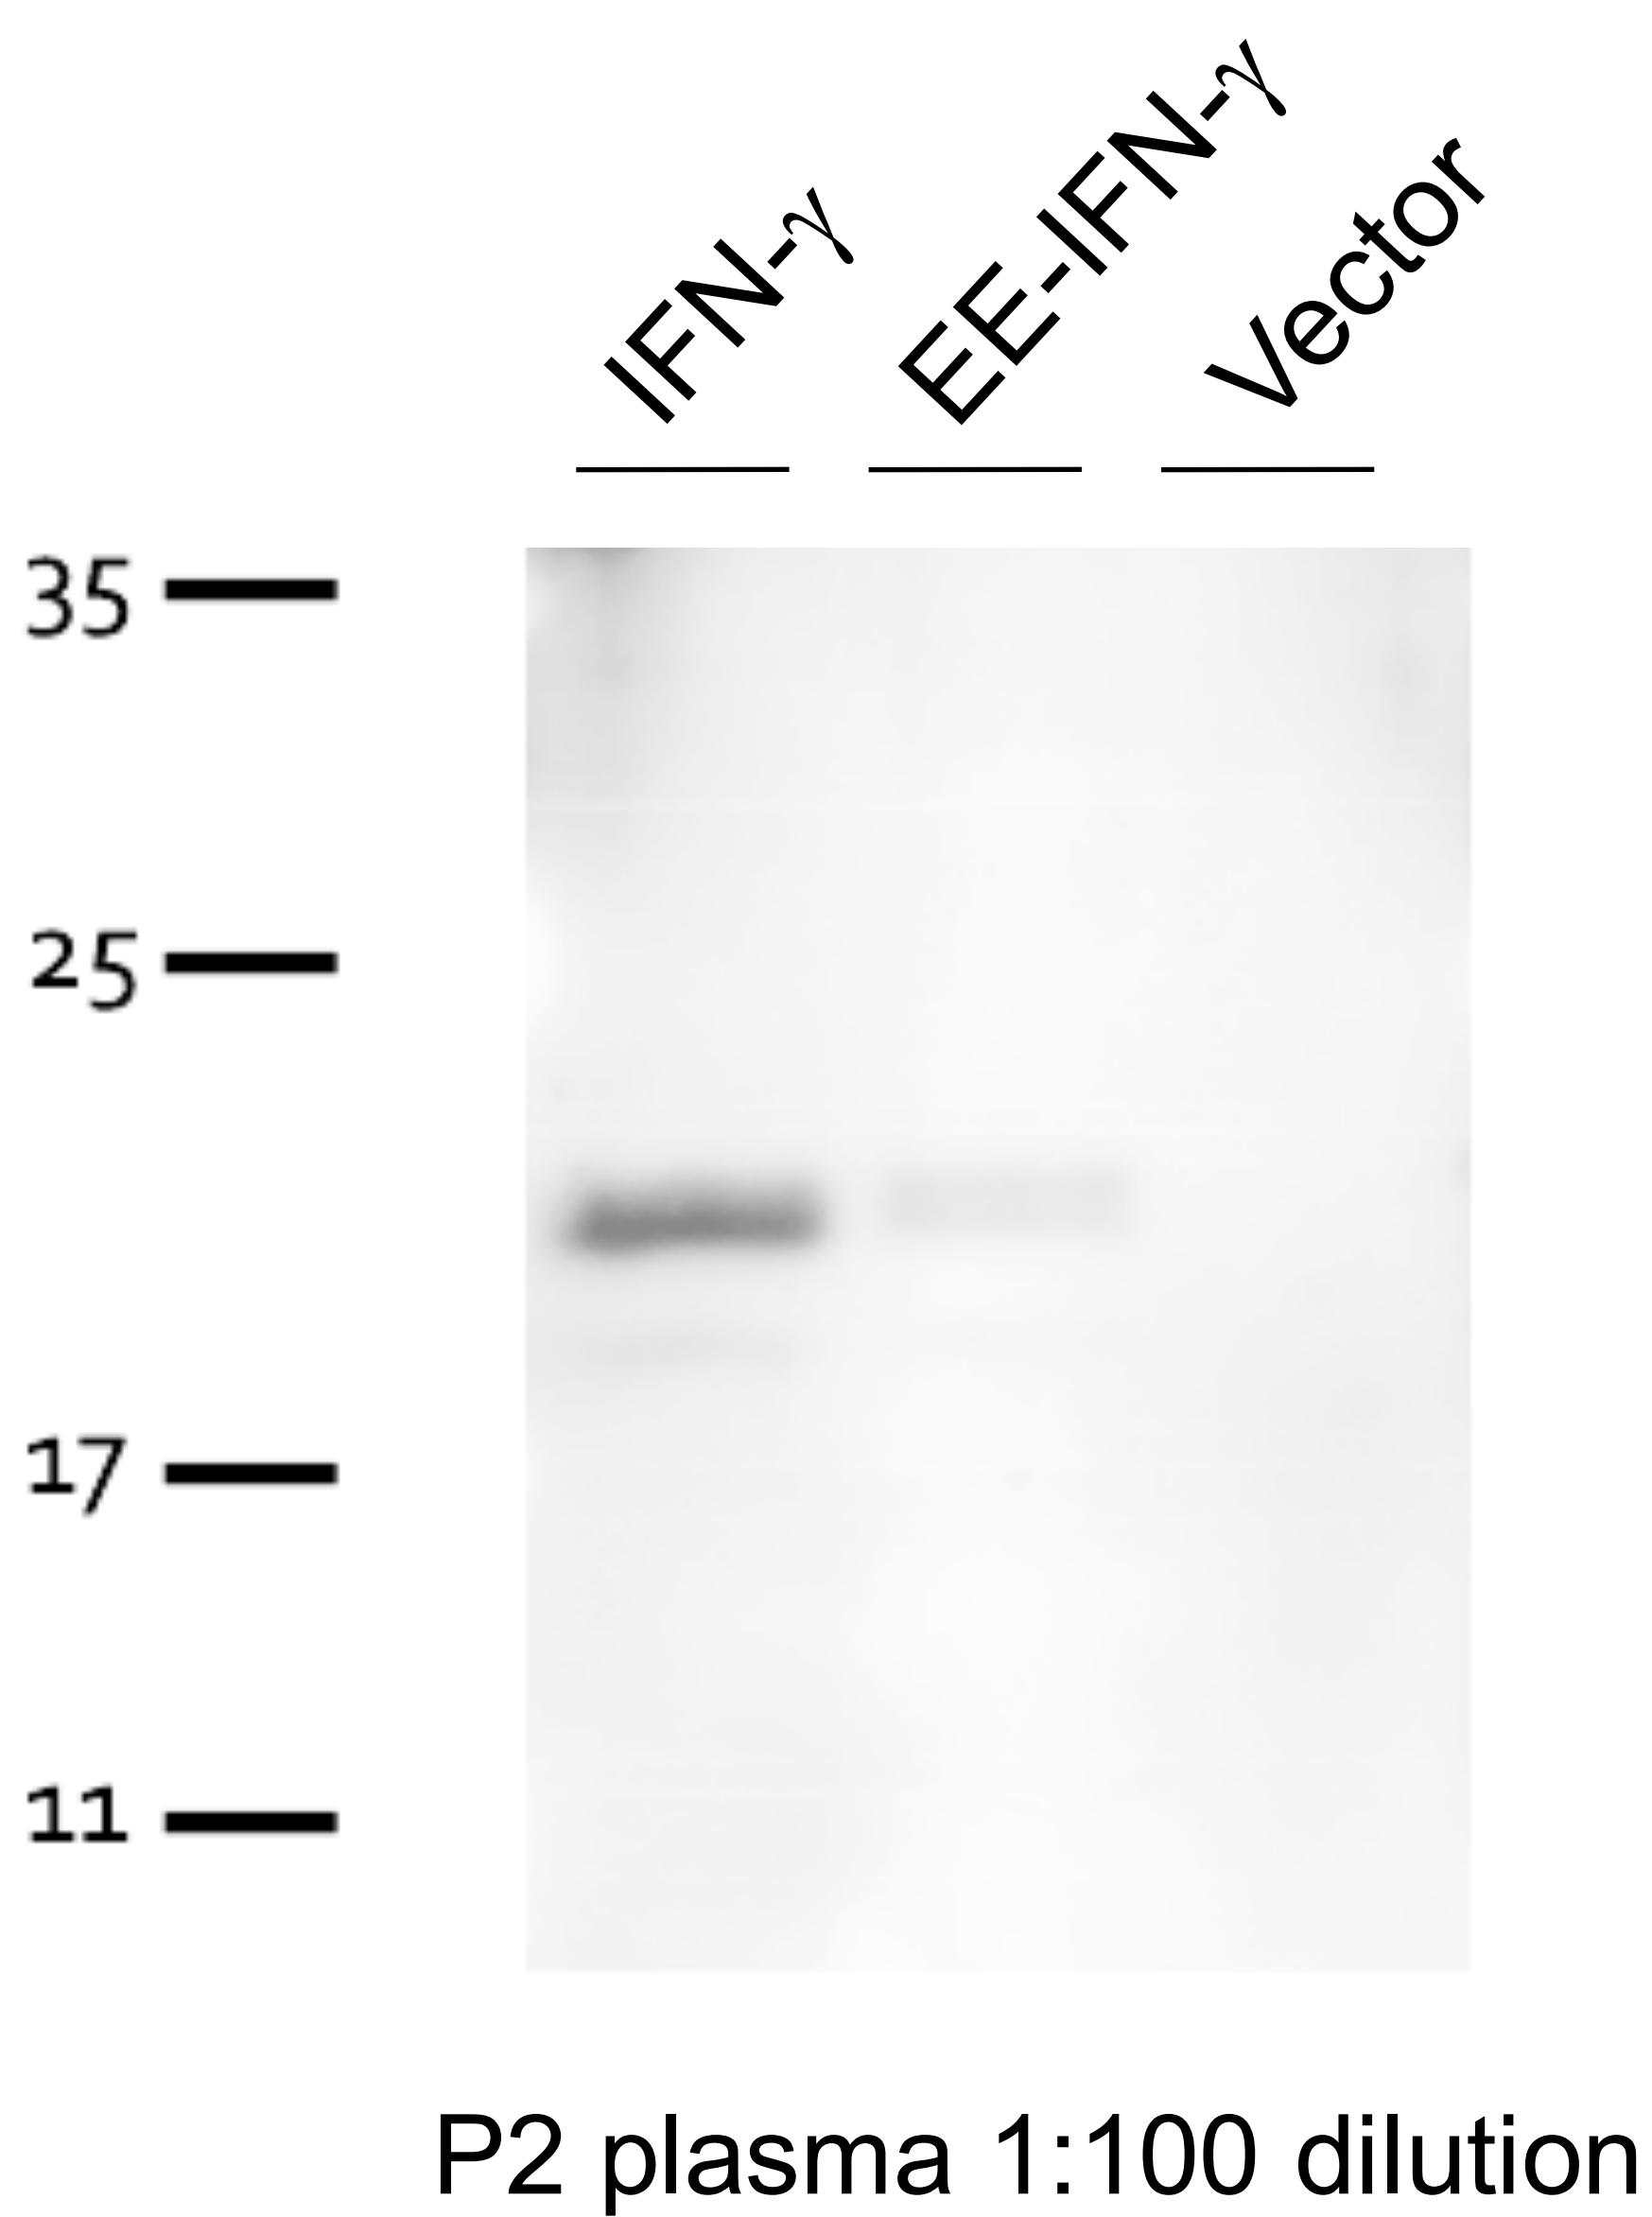

# Supplementary Figure 9

**e**

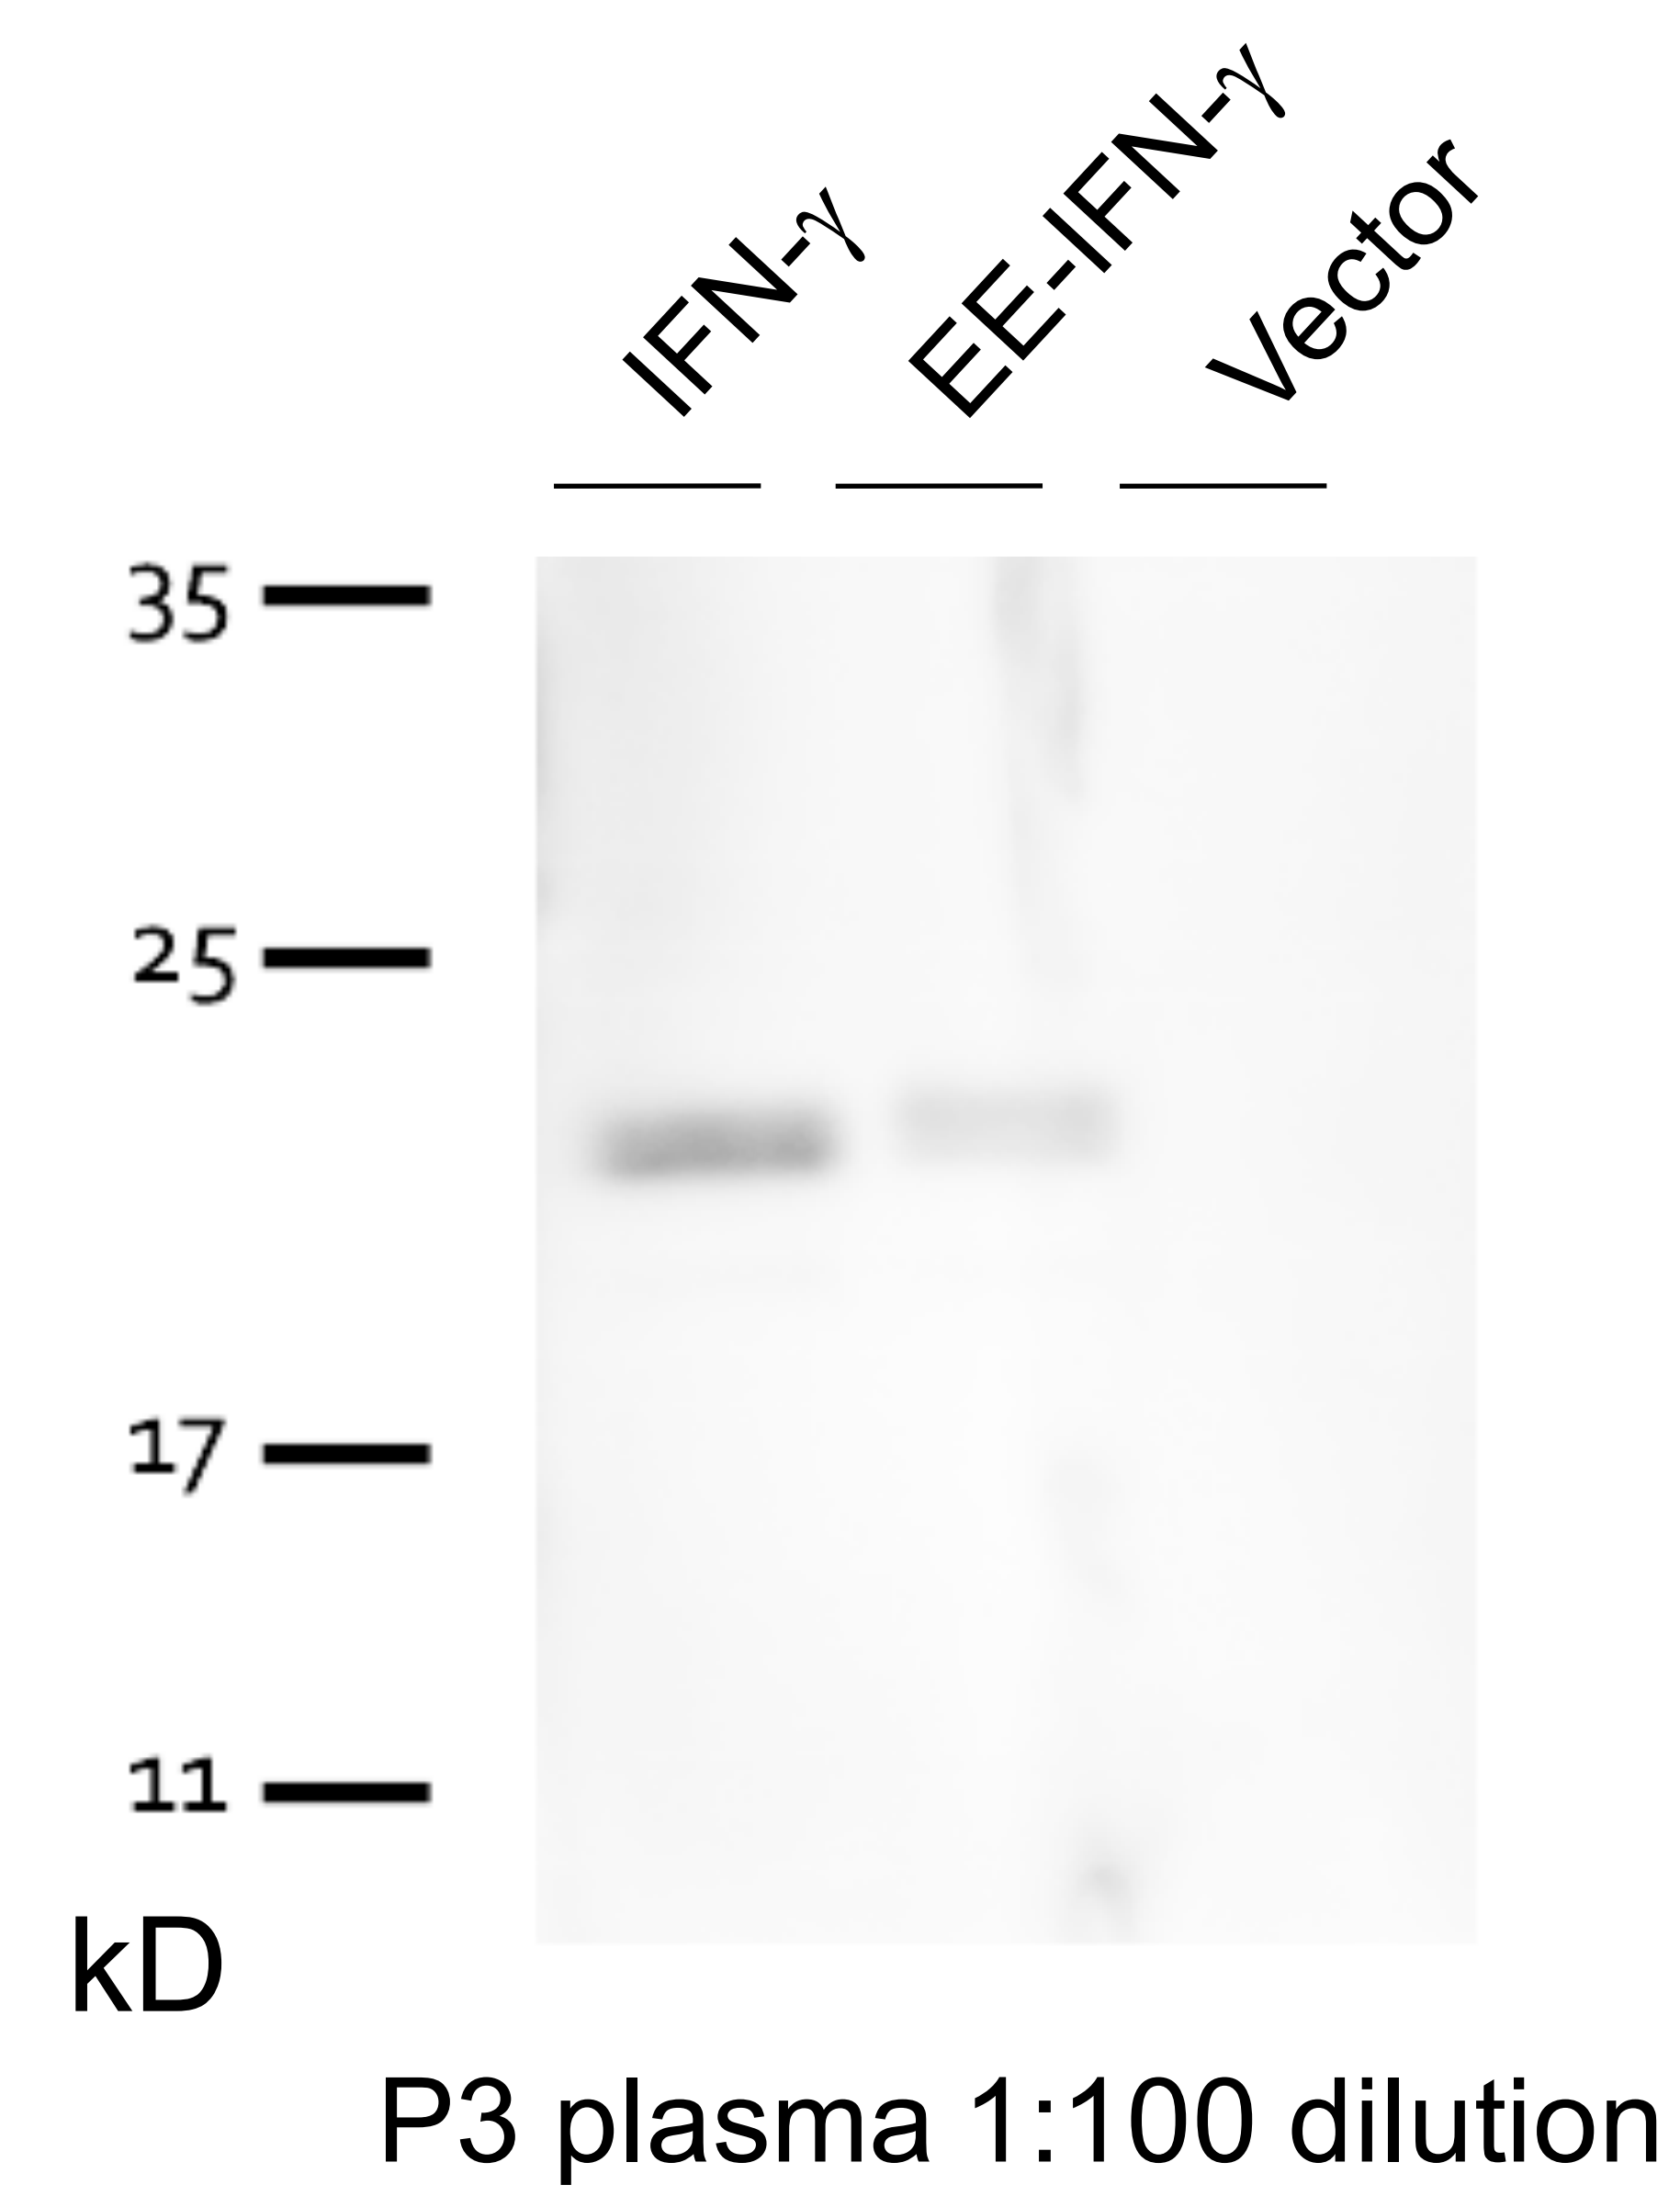

**f**

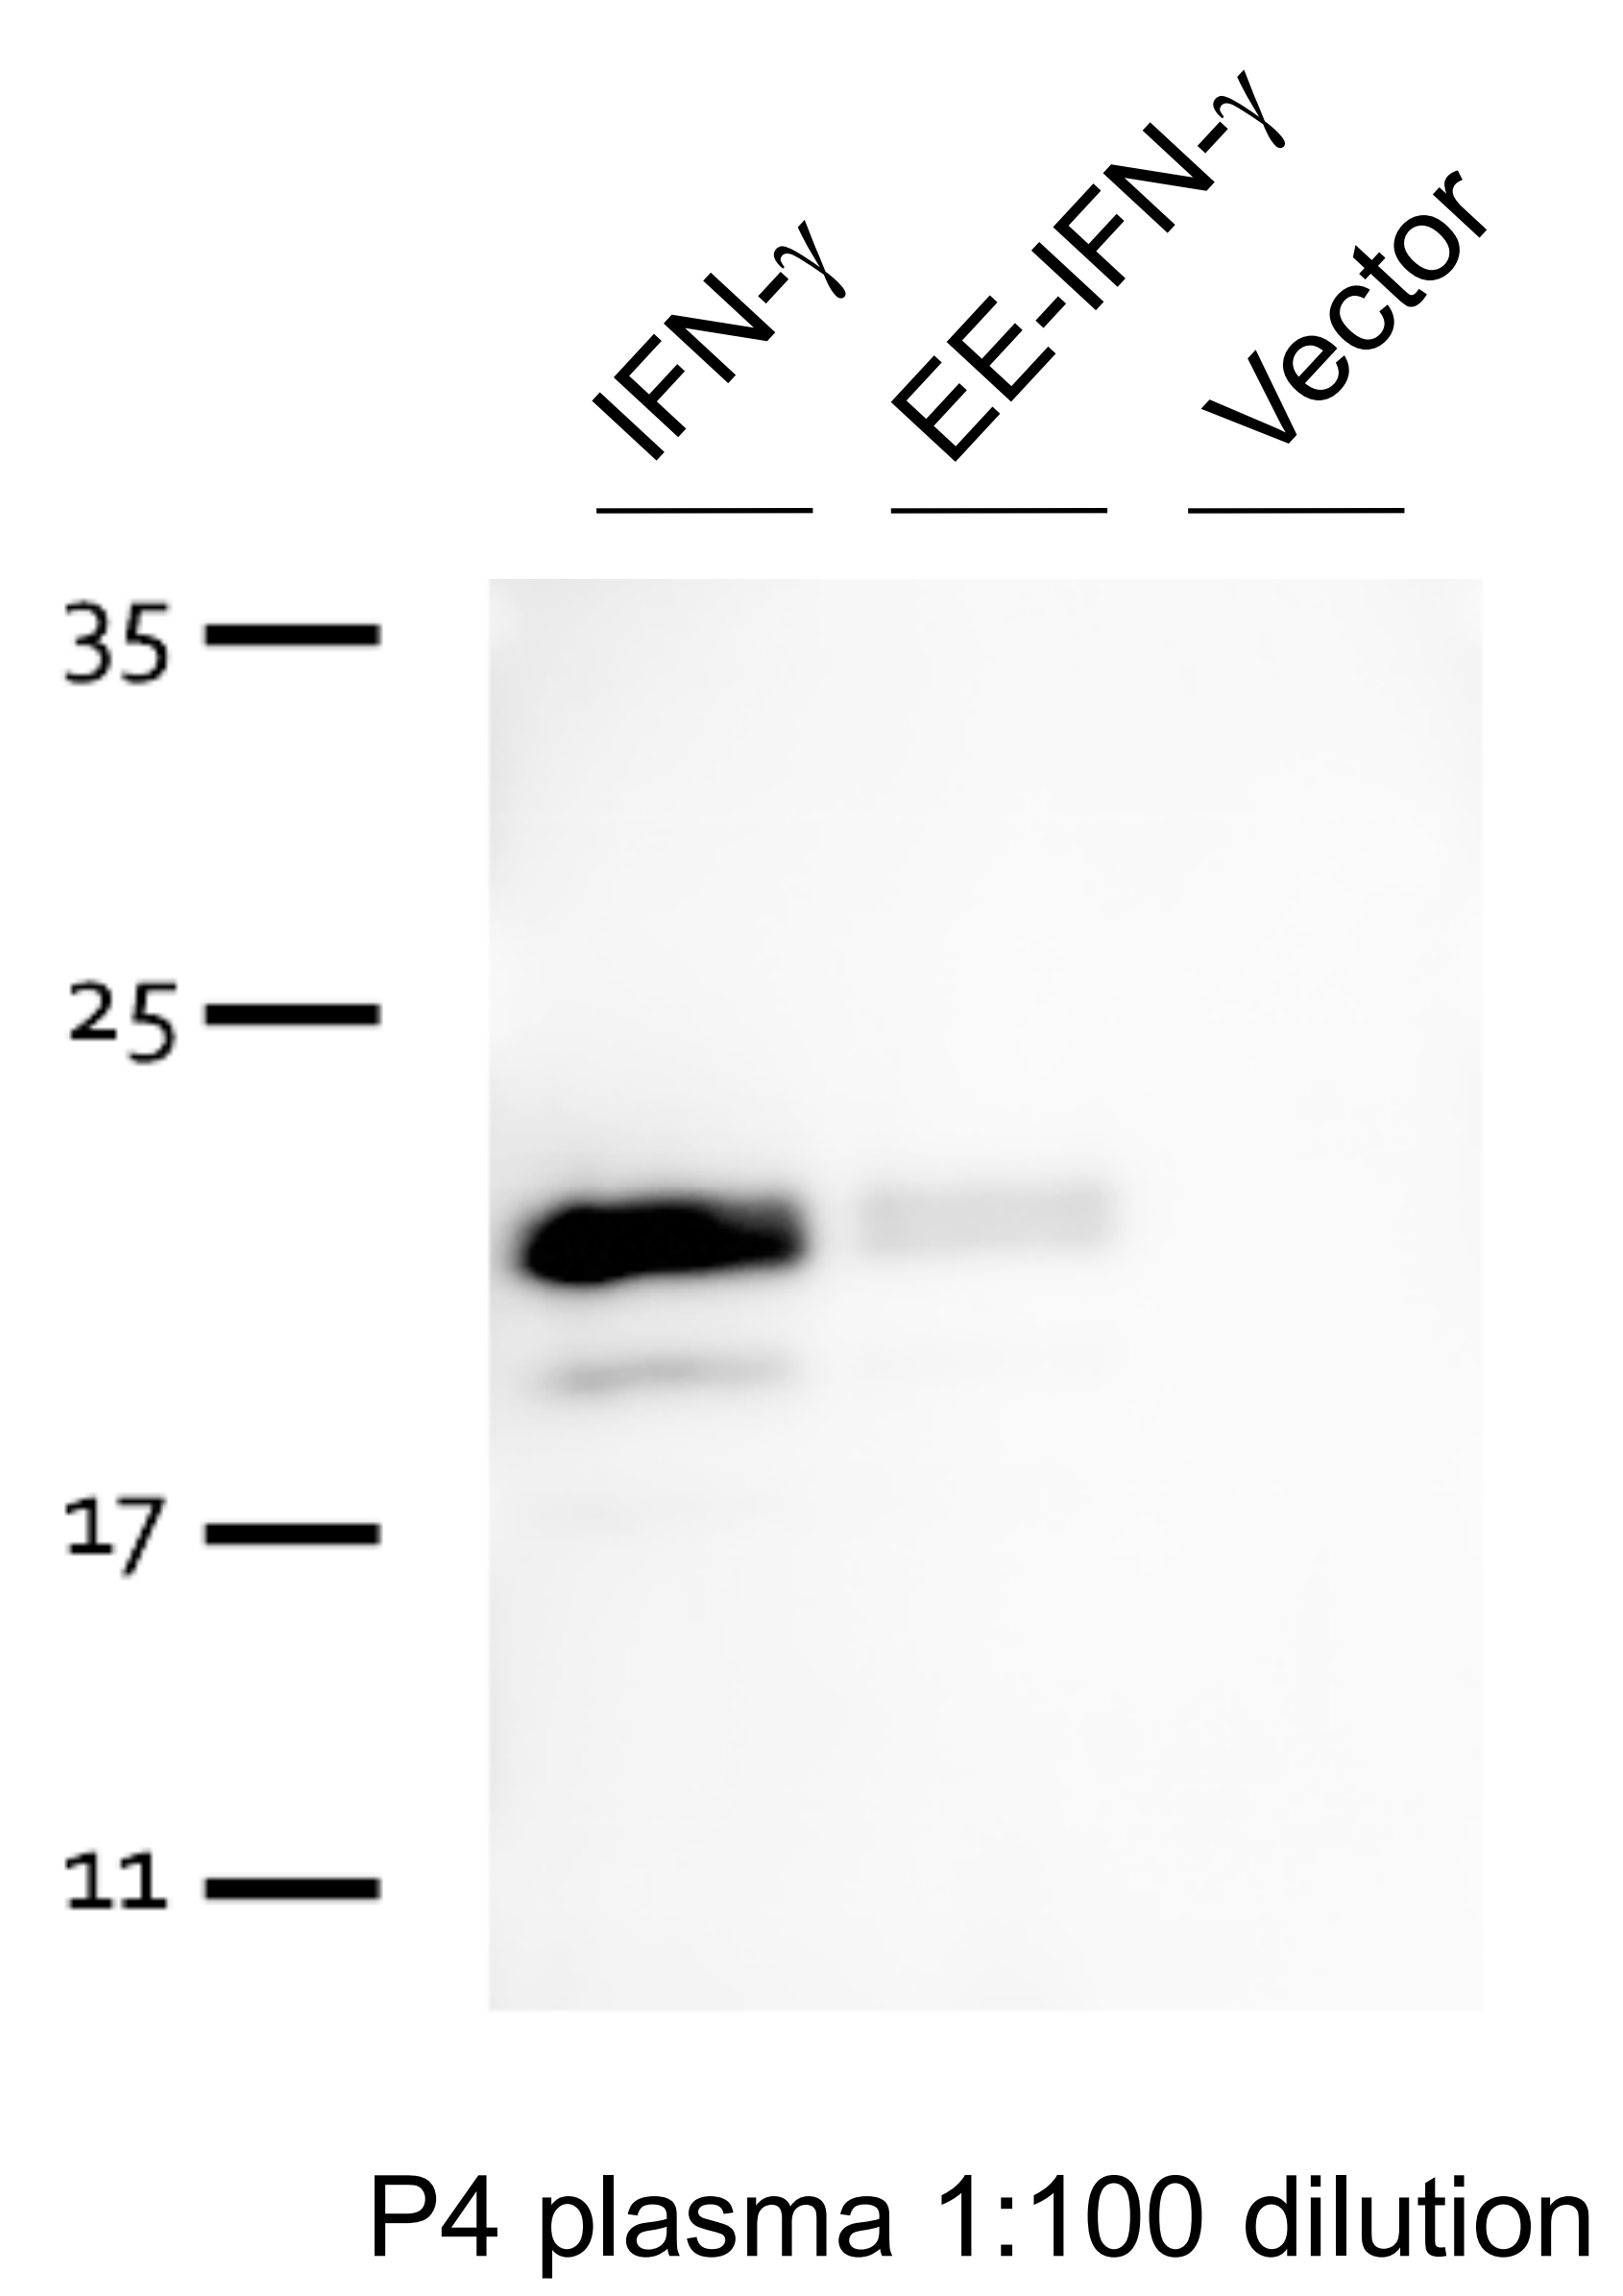

**g**

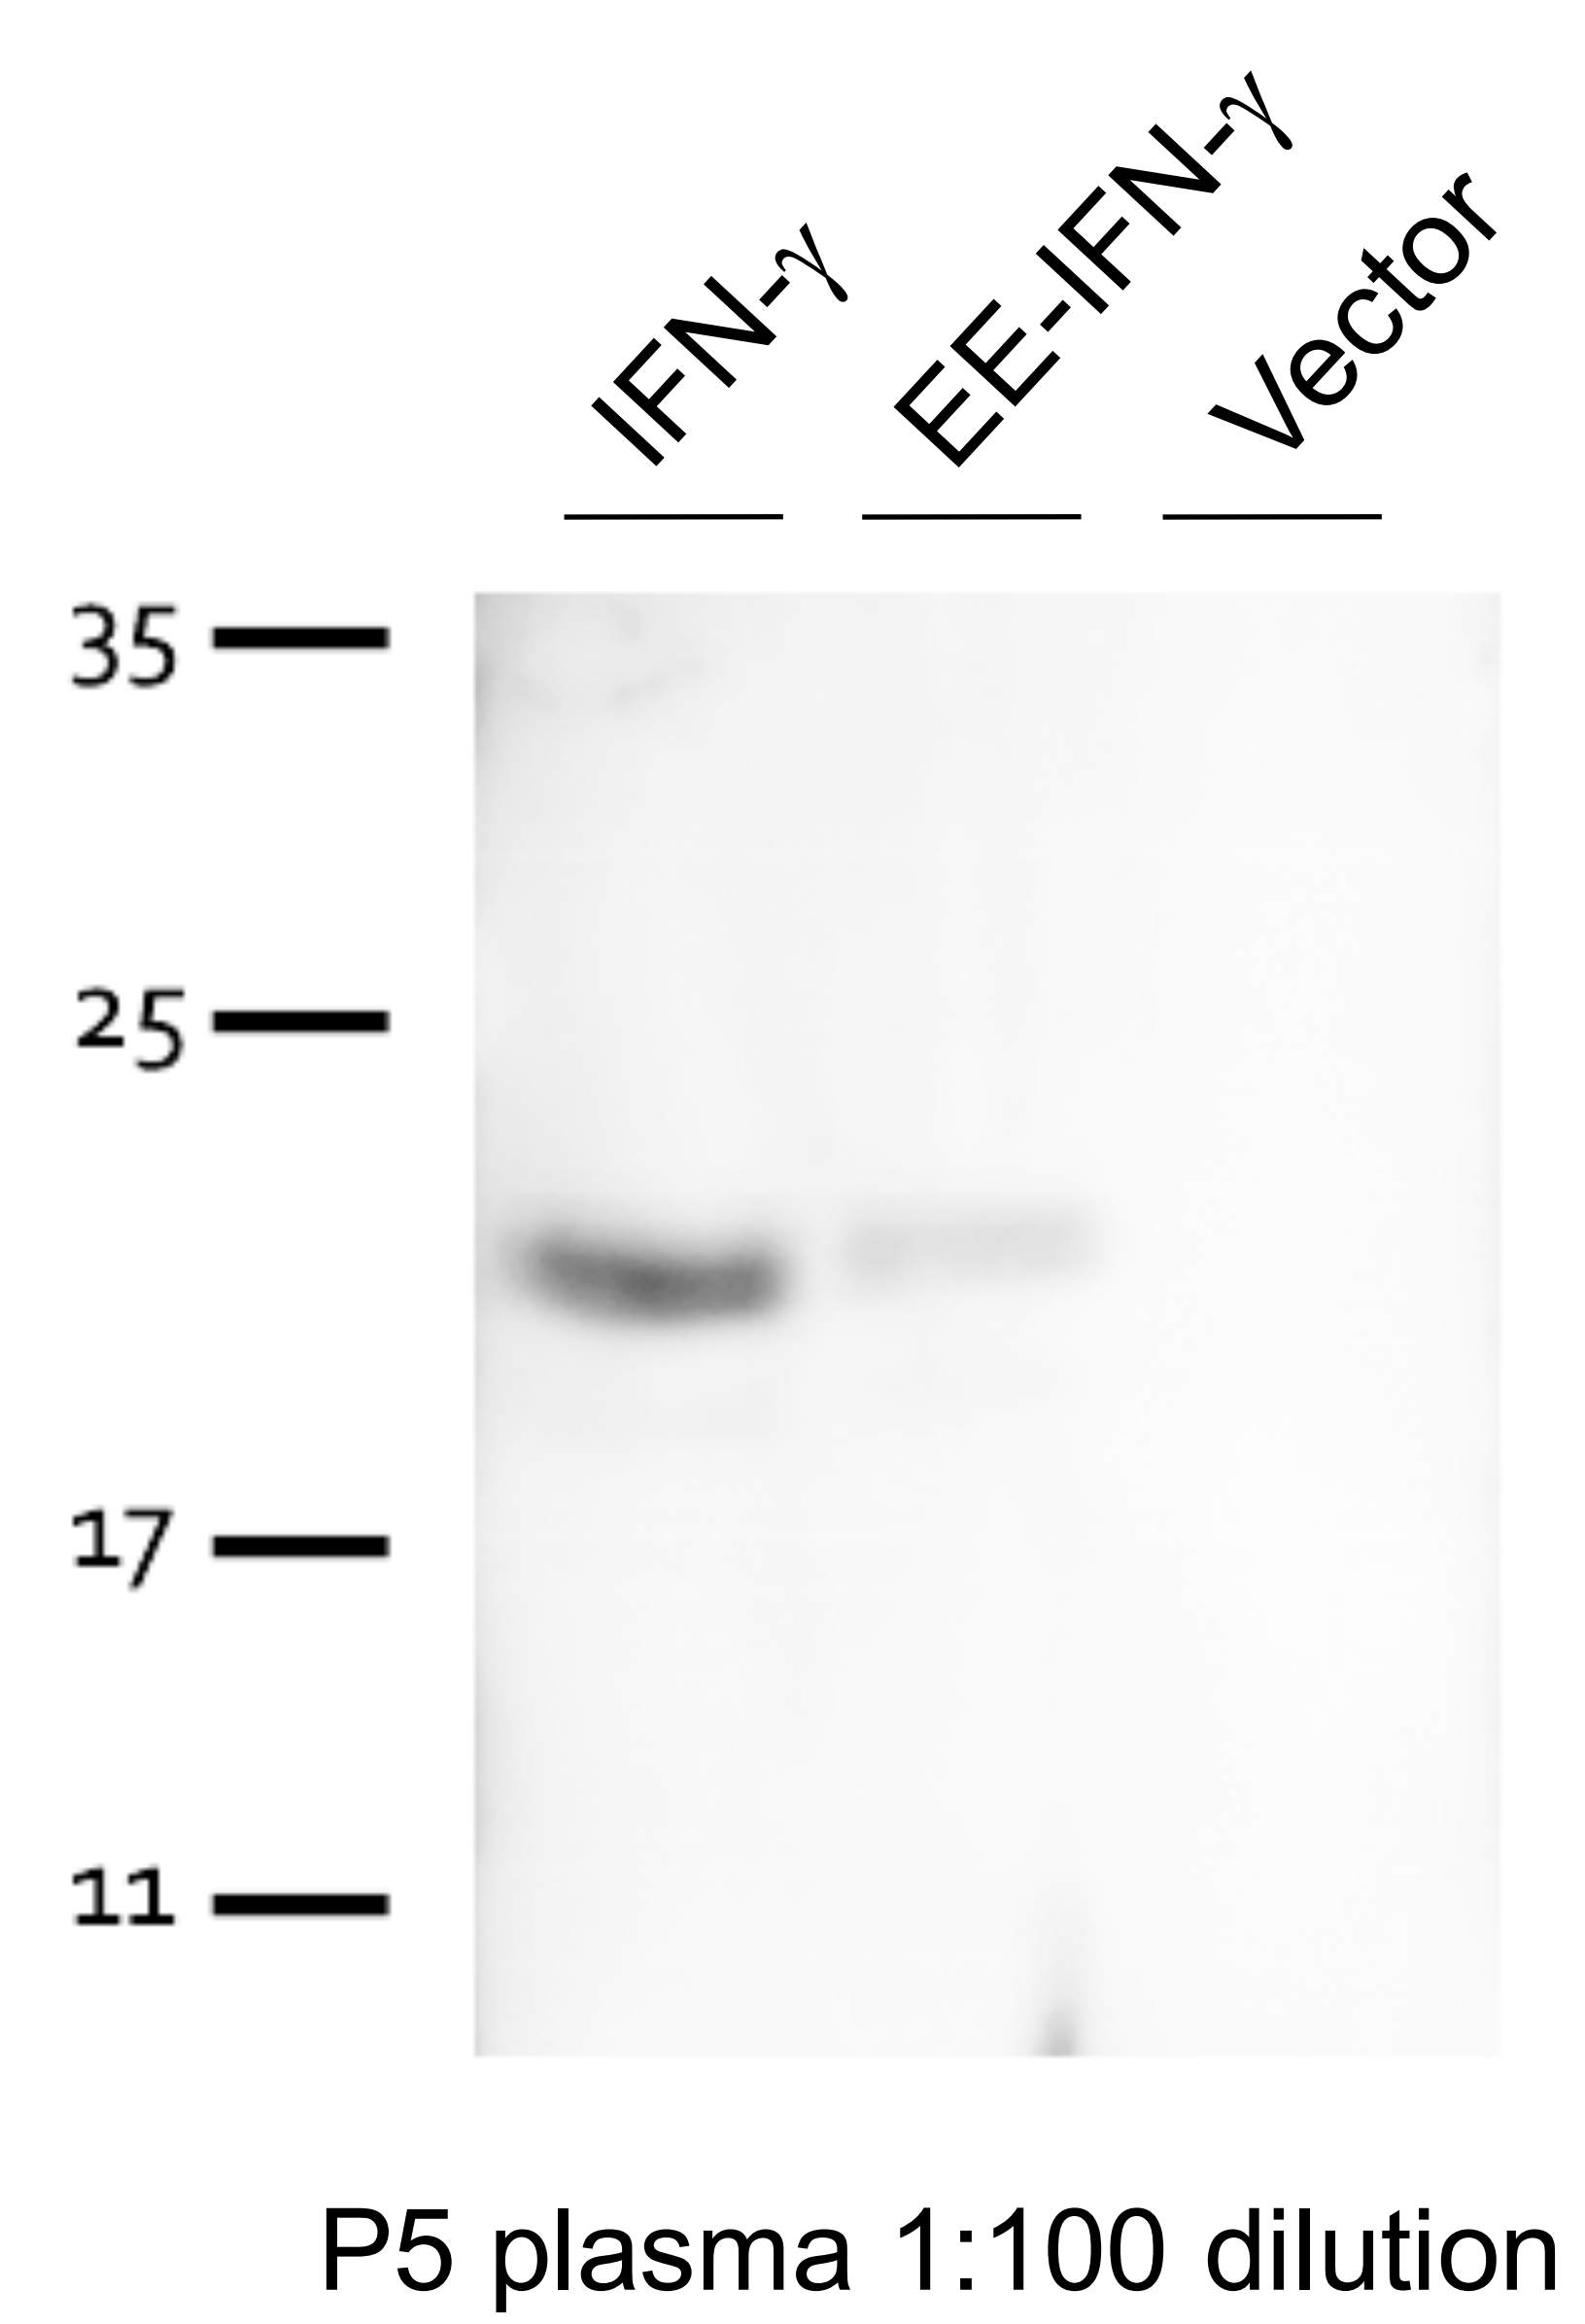

**h**

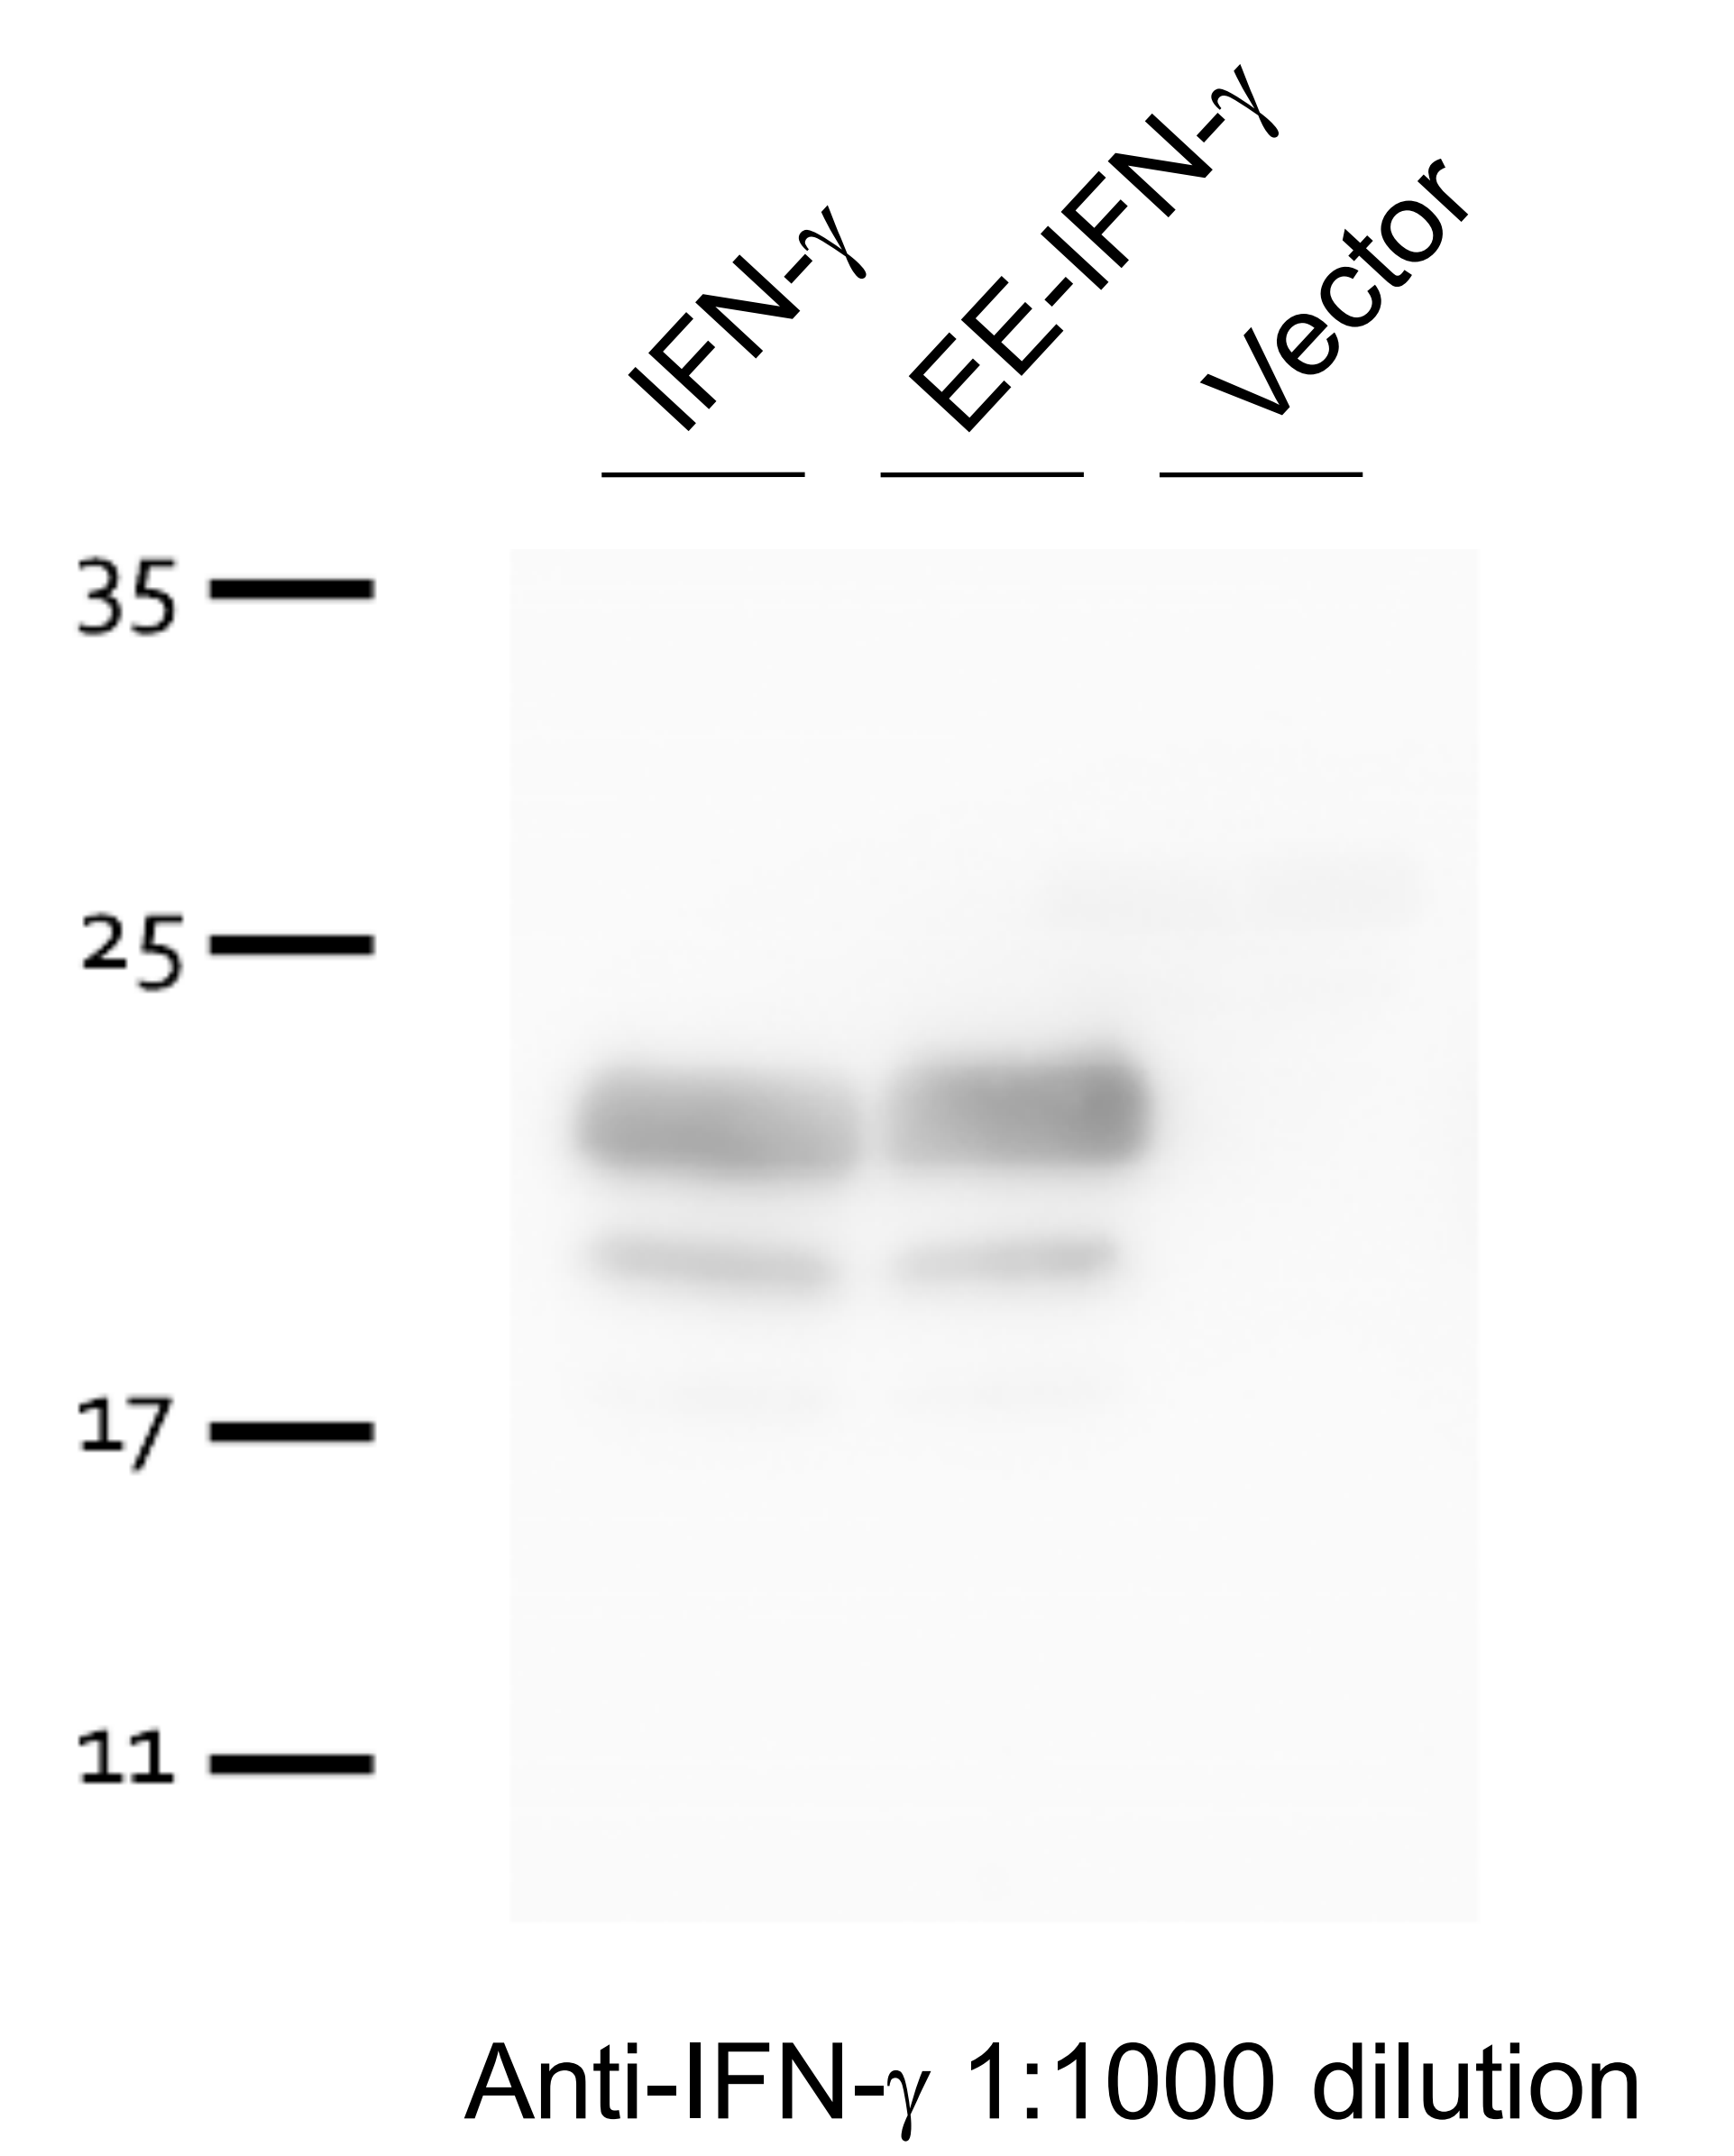

**Supplementary Figure 9. Western blotting revealed differences in the binding strength of anti-IFN- $\gamma$  AutoAbs for EE-IFN- $\gamma$  and IFN- $\gamma_{1-131}$ .** Western blot showing the binding of plasma from randomly selected healthy controls ( $n = 2$ , C1 and C2) (**a** and **b**) and anti-IFN- $\gamma$  AutoAbs patients ( $n = 5$ , P1–5) (**c–g**) to IFN- $\gamma_{1-131}$  and EE-IFN- $\gamma$ . IFN- $\gamma_{1-131}$  and EE-IFN- $\gamma$  loading control were detected with anti-IFN- $\gamma$  antibody (**h**). Similar results were obtained in at least three replicated experiments.

# Supplementary Figure 10

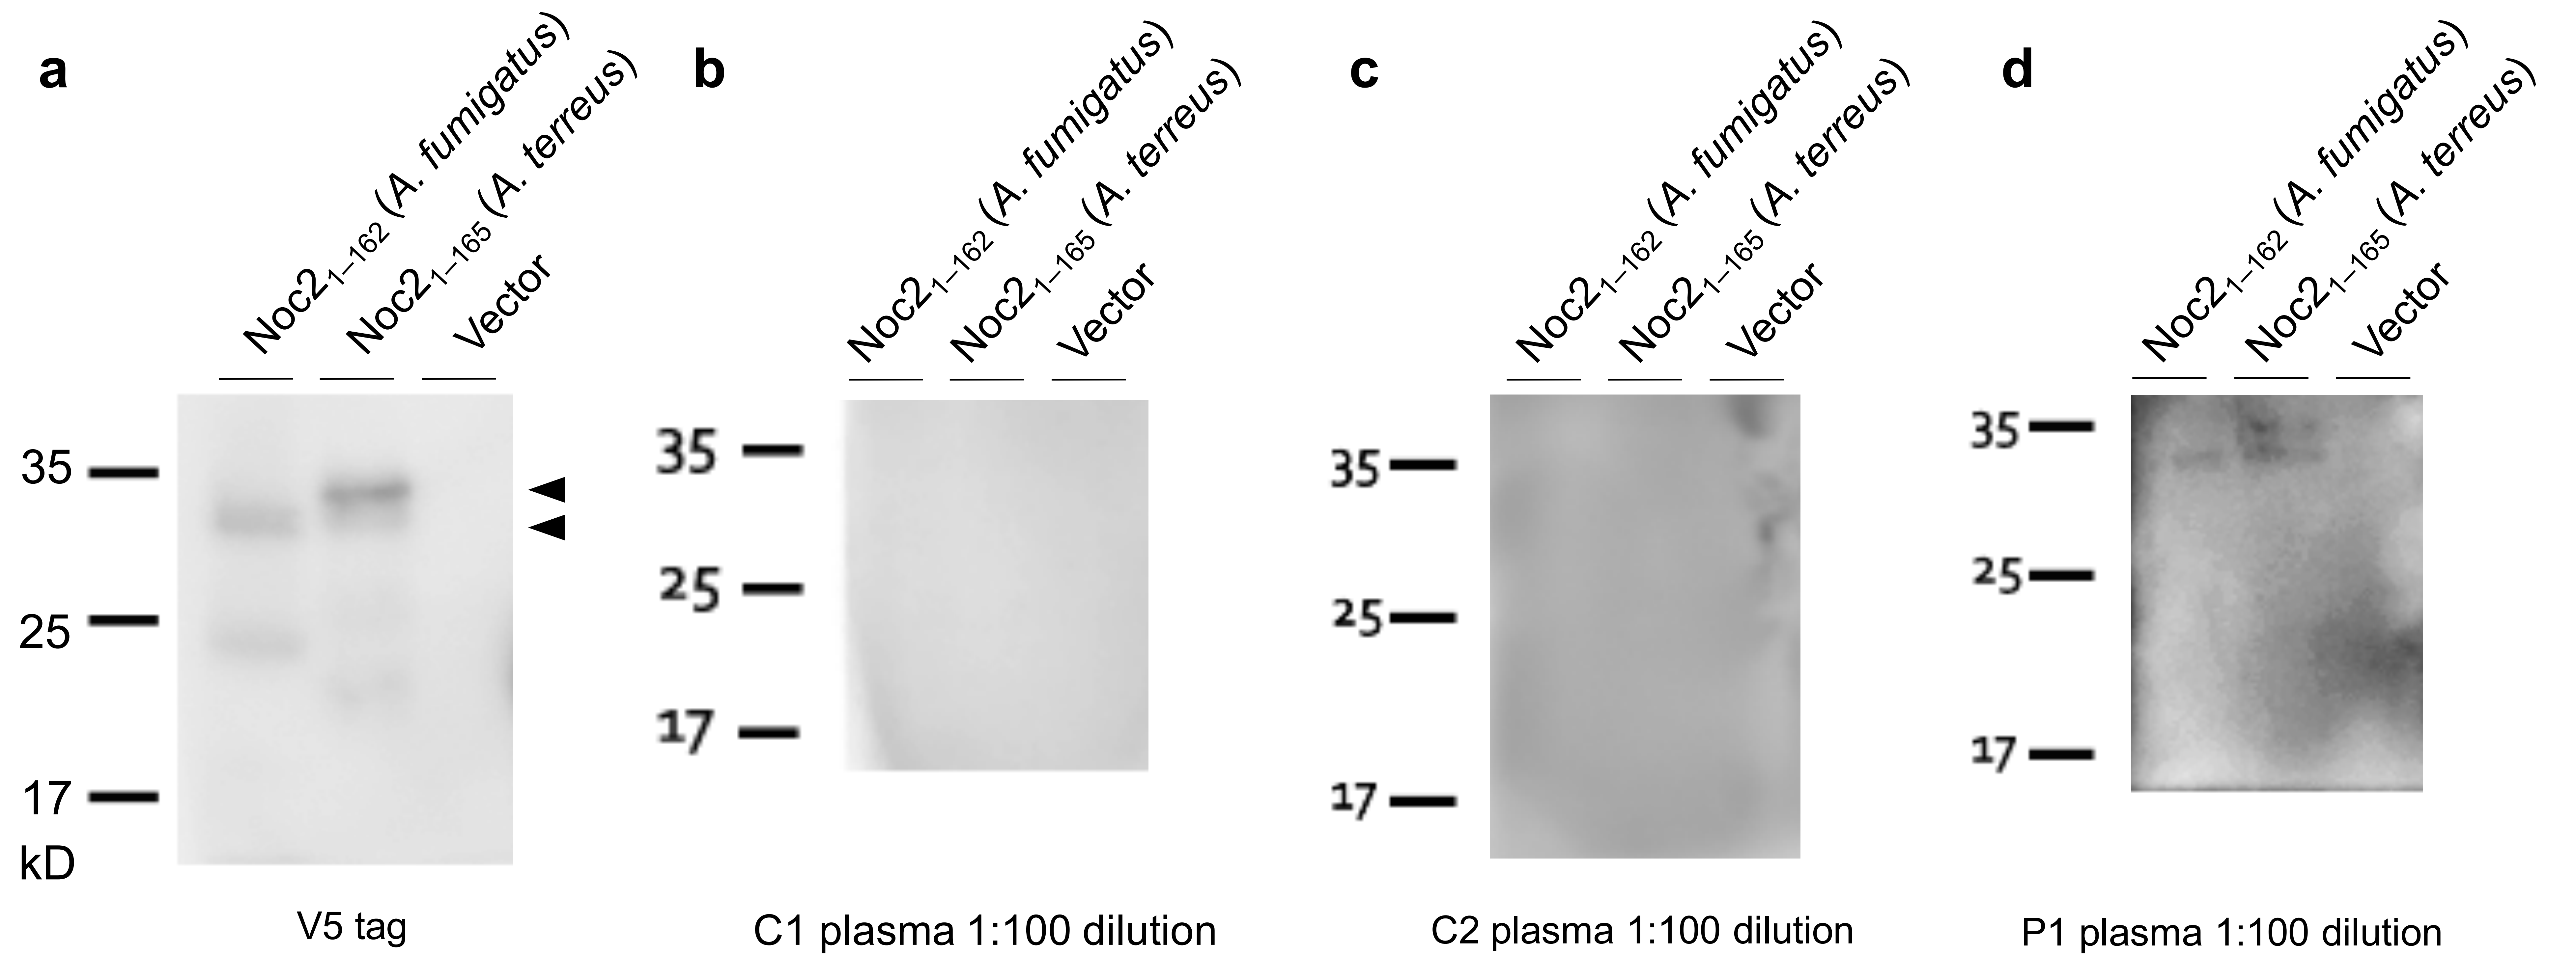

# Supplementary Figure 10

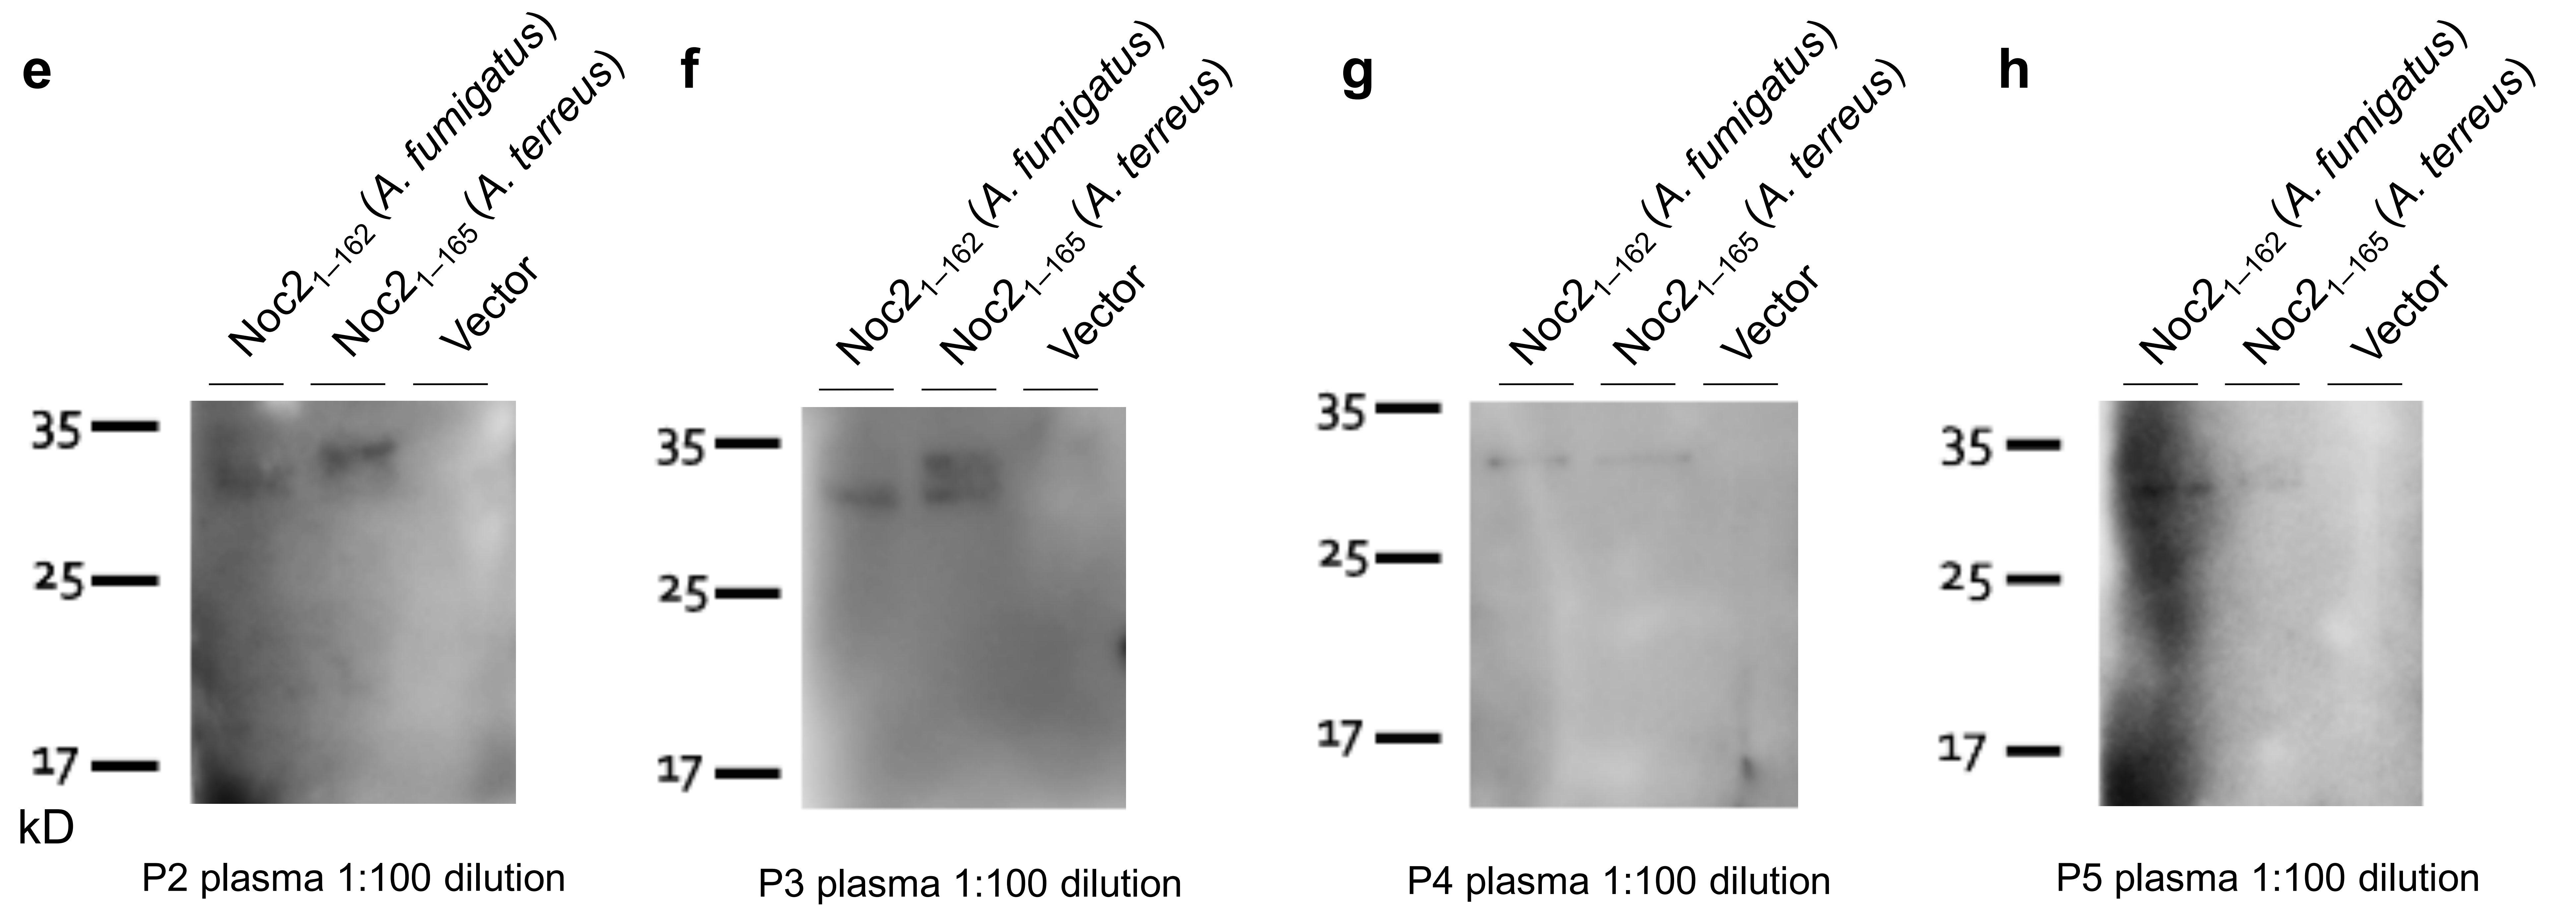

**Supplementary Figure 10. AutoAbs against IFN- $\gamma$  bound to *Aspergillus* Noc2.** Western blot analysis of the different forms of *Aspergillus fumigatus* (amino acids 1–162) and *Aspergillus terreus* (amino acids 1–165) recombinant Noc2 protein detected with a V5-tagged antibody (**a**). Western blot showing the ability of plasma from randomly selected Controls ( $n = 2$ , C1 and C2) (**b** and **c**) and IFN- $\gamma$  AutoAbs Pts ( $n = 5$ , P1–5) (**d–h**) to bind various truncated forms of Noc2. Results from a representative experiment are shown. Similar results were obtained in at least three replicated experiments.

Supplementary Figure 11

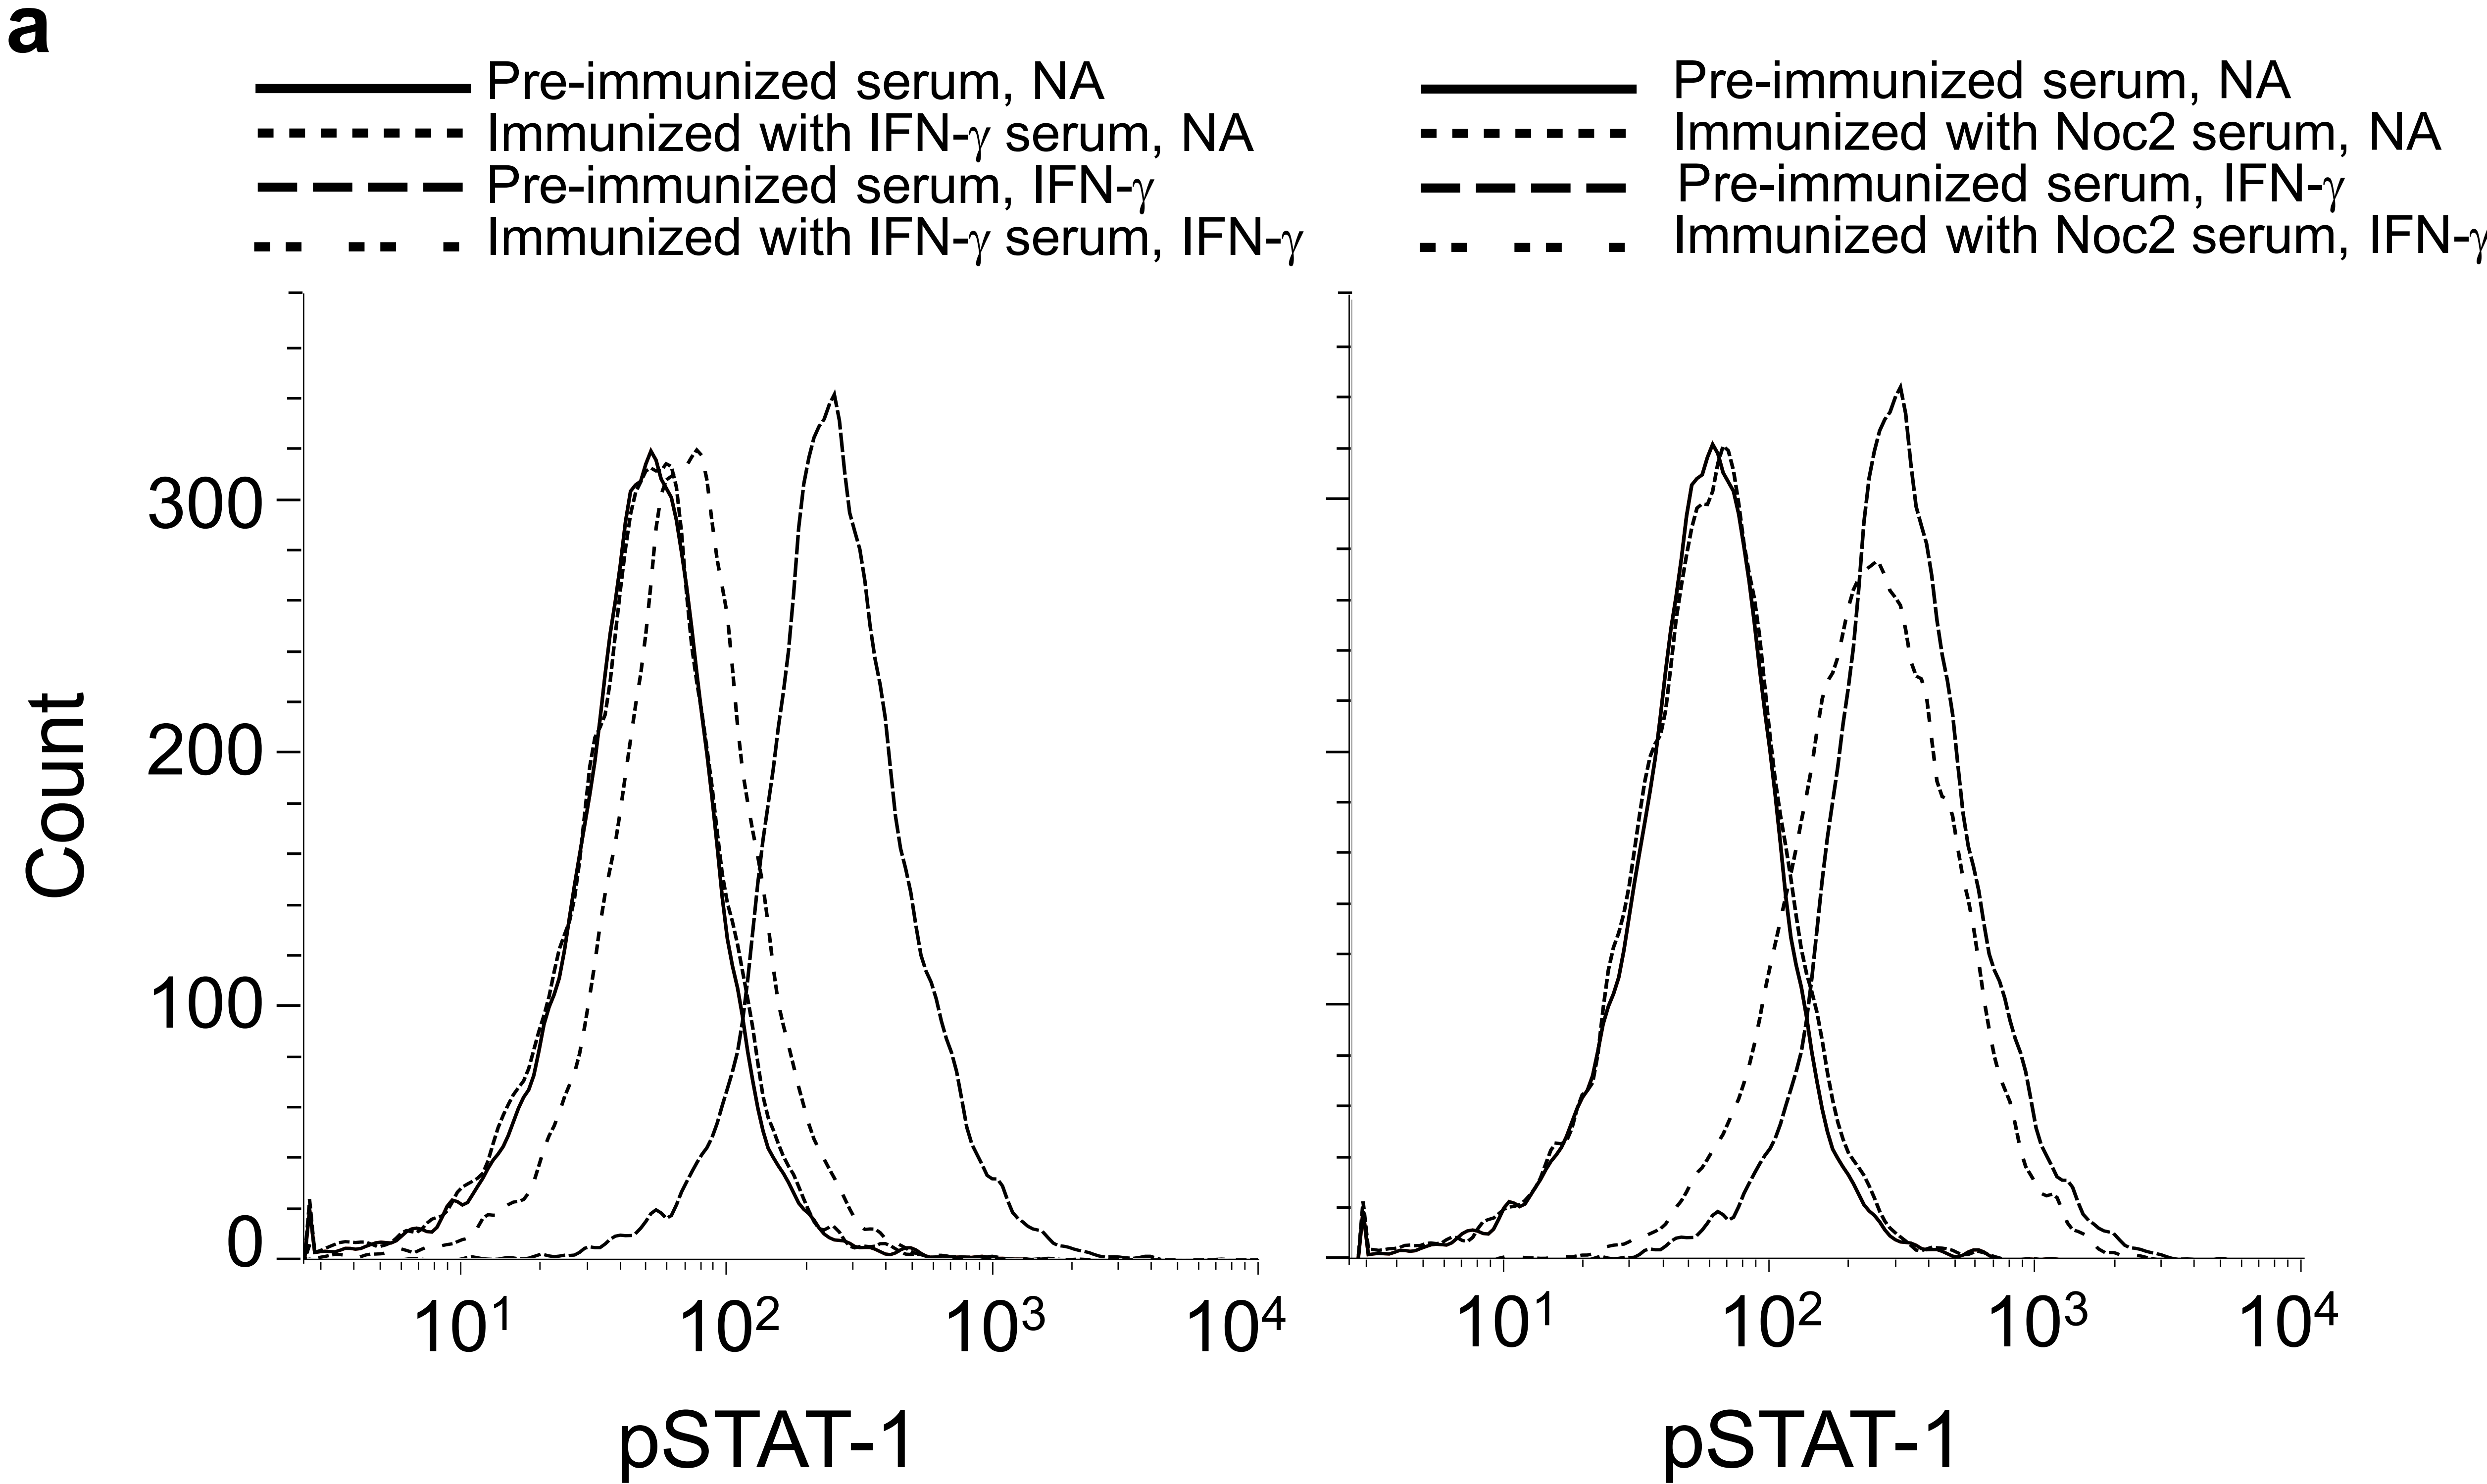



Supplementary Figure 11

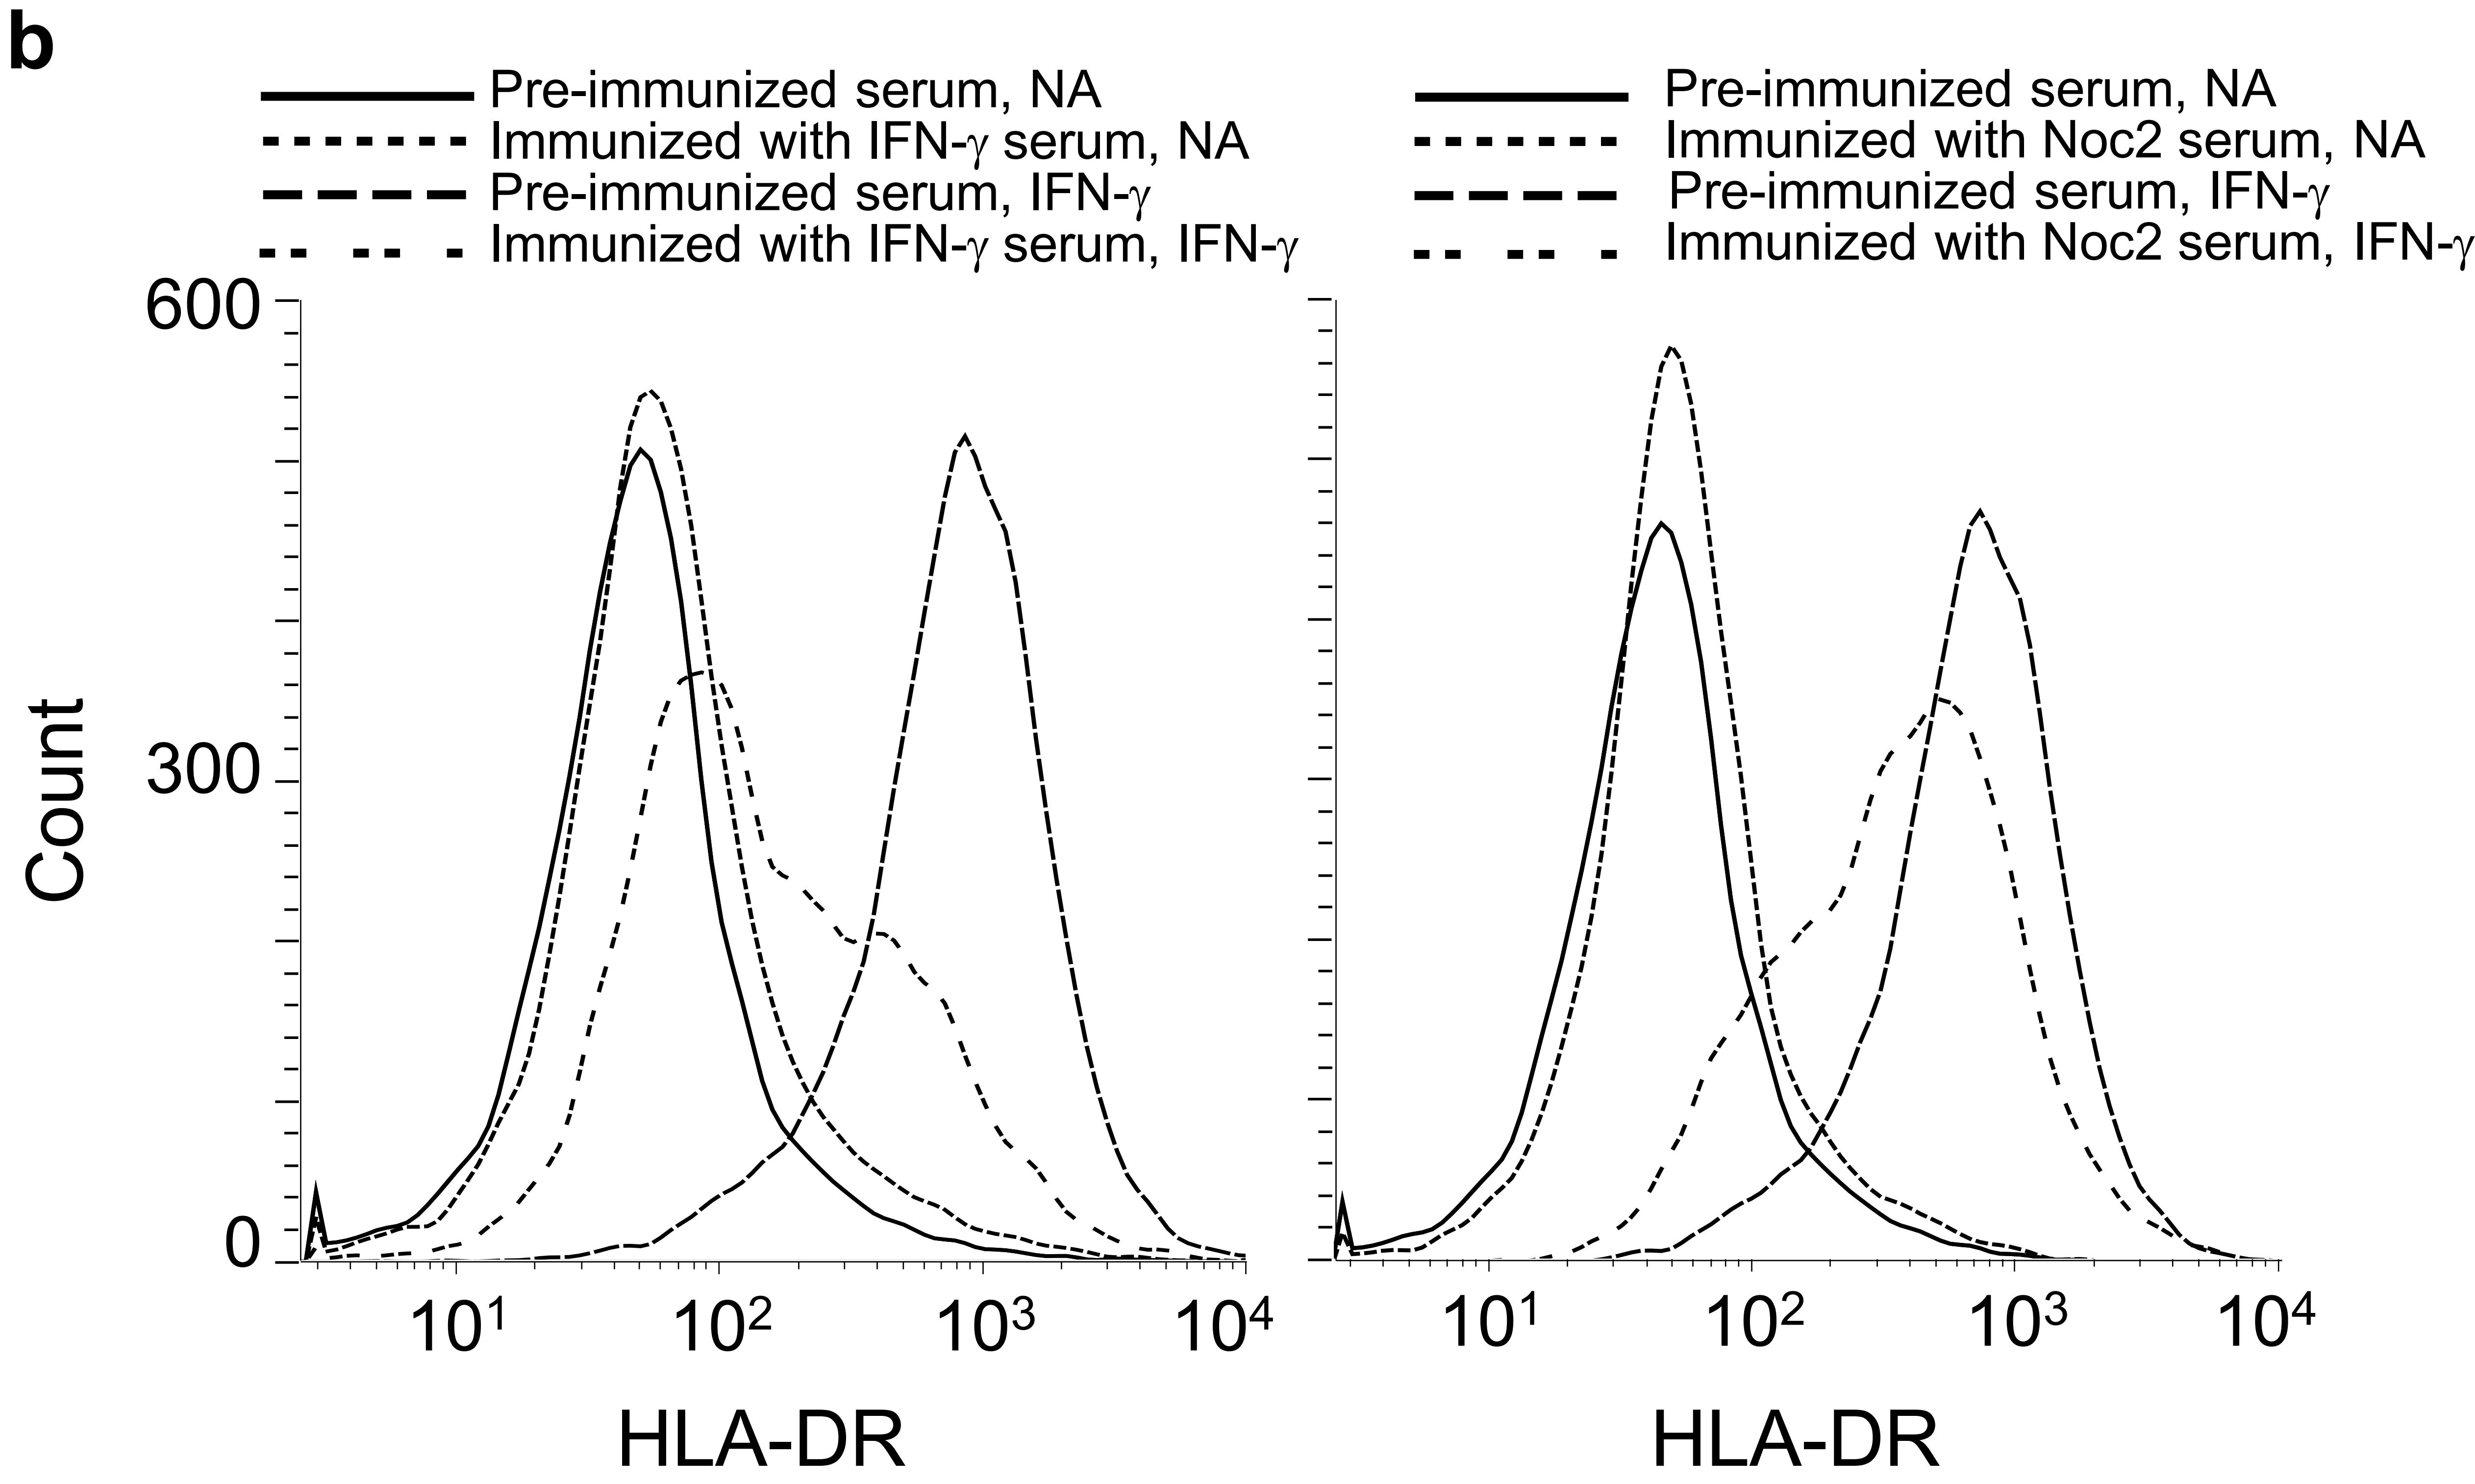



**Supplementary Figure 11. Purified IgG from rats immunized with Noc2 or IFN- $\gamma$  blocked the IFN- $\gamma$ -induced upregulation of p-STAT1 and HLA-DR.** THP1 cells were incubated with IgG from non-immunized rats ( $n = 6$ ), Noc2 peptide-immunized rats ( $n = 6$ ) or IFN- $\gamma$  peptide 6-immunized rats ( $n = 6$ ) and treated with recombinant IFN- $\gamma$ . P-STAT1 levels were measured by flow cytometry with the p-STAT1 monoclonal antibody; representative histograms (**a**) are shown. HLA-DR expression was measured by flow cytometry with an HLA-DR monoclonal antibody; representative histograms (**b**) are shown.

# Supplementary Figure 12

**a**

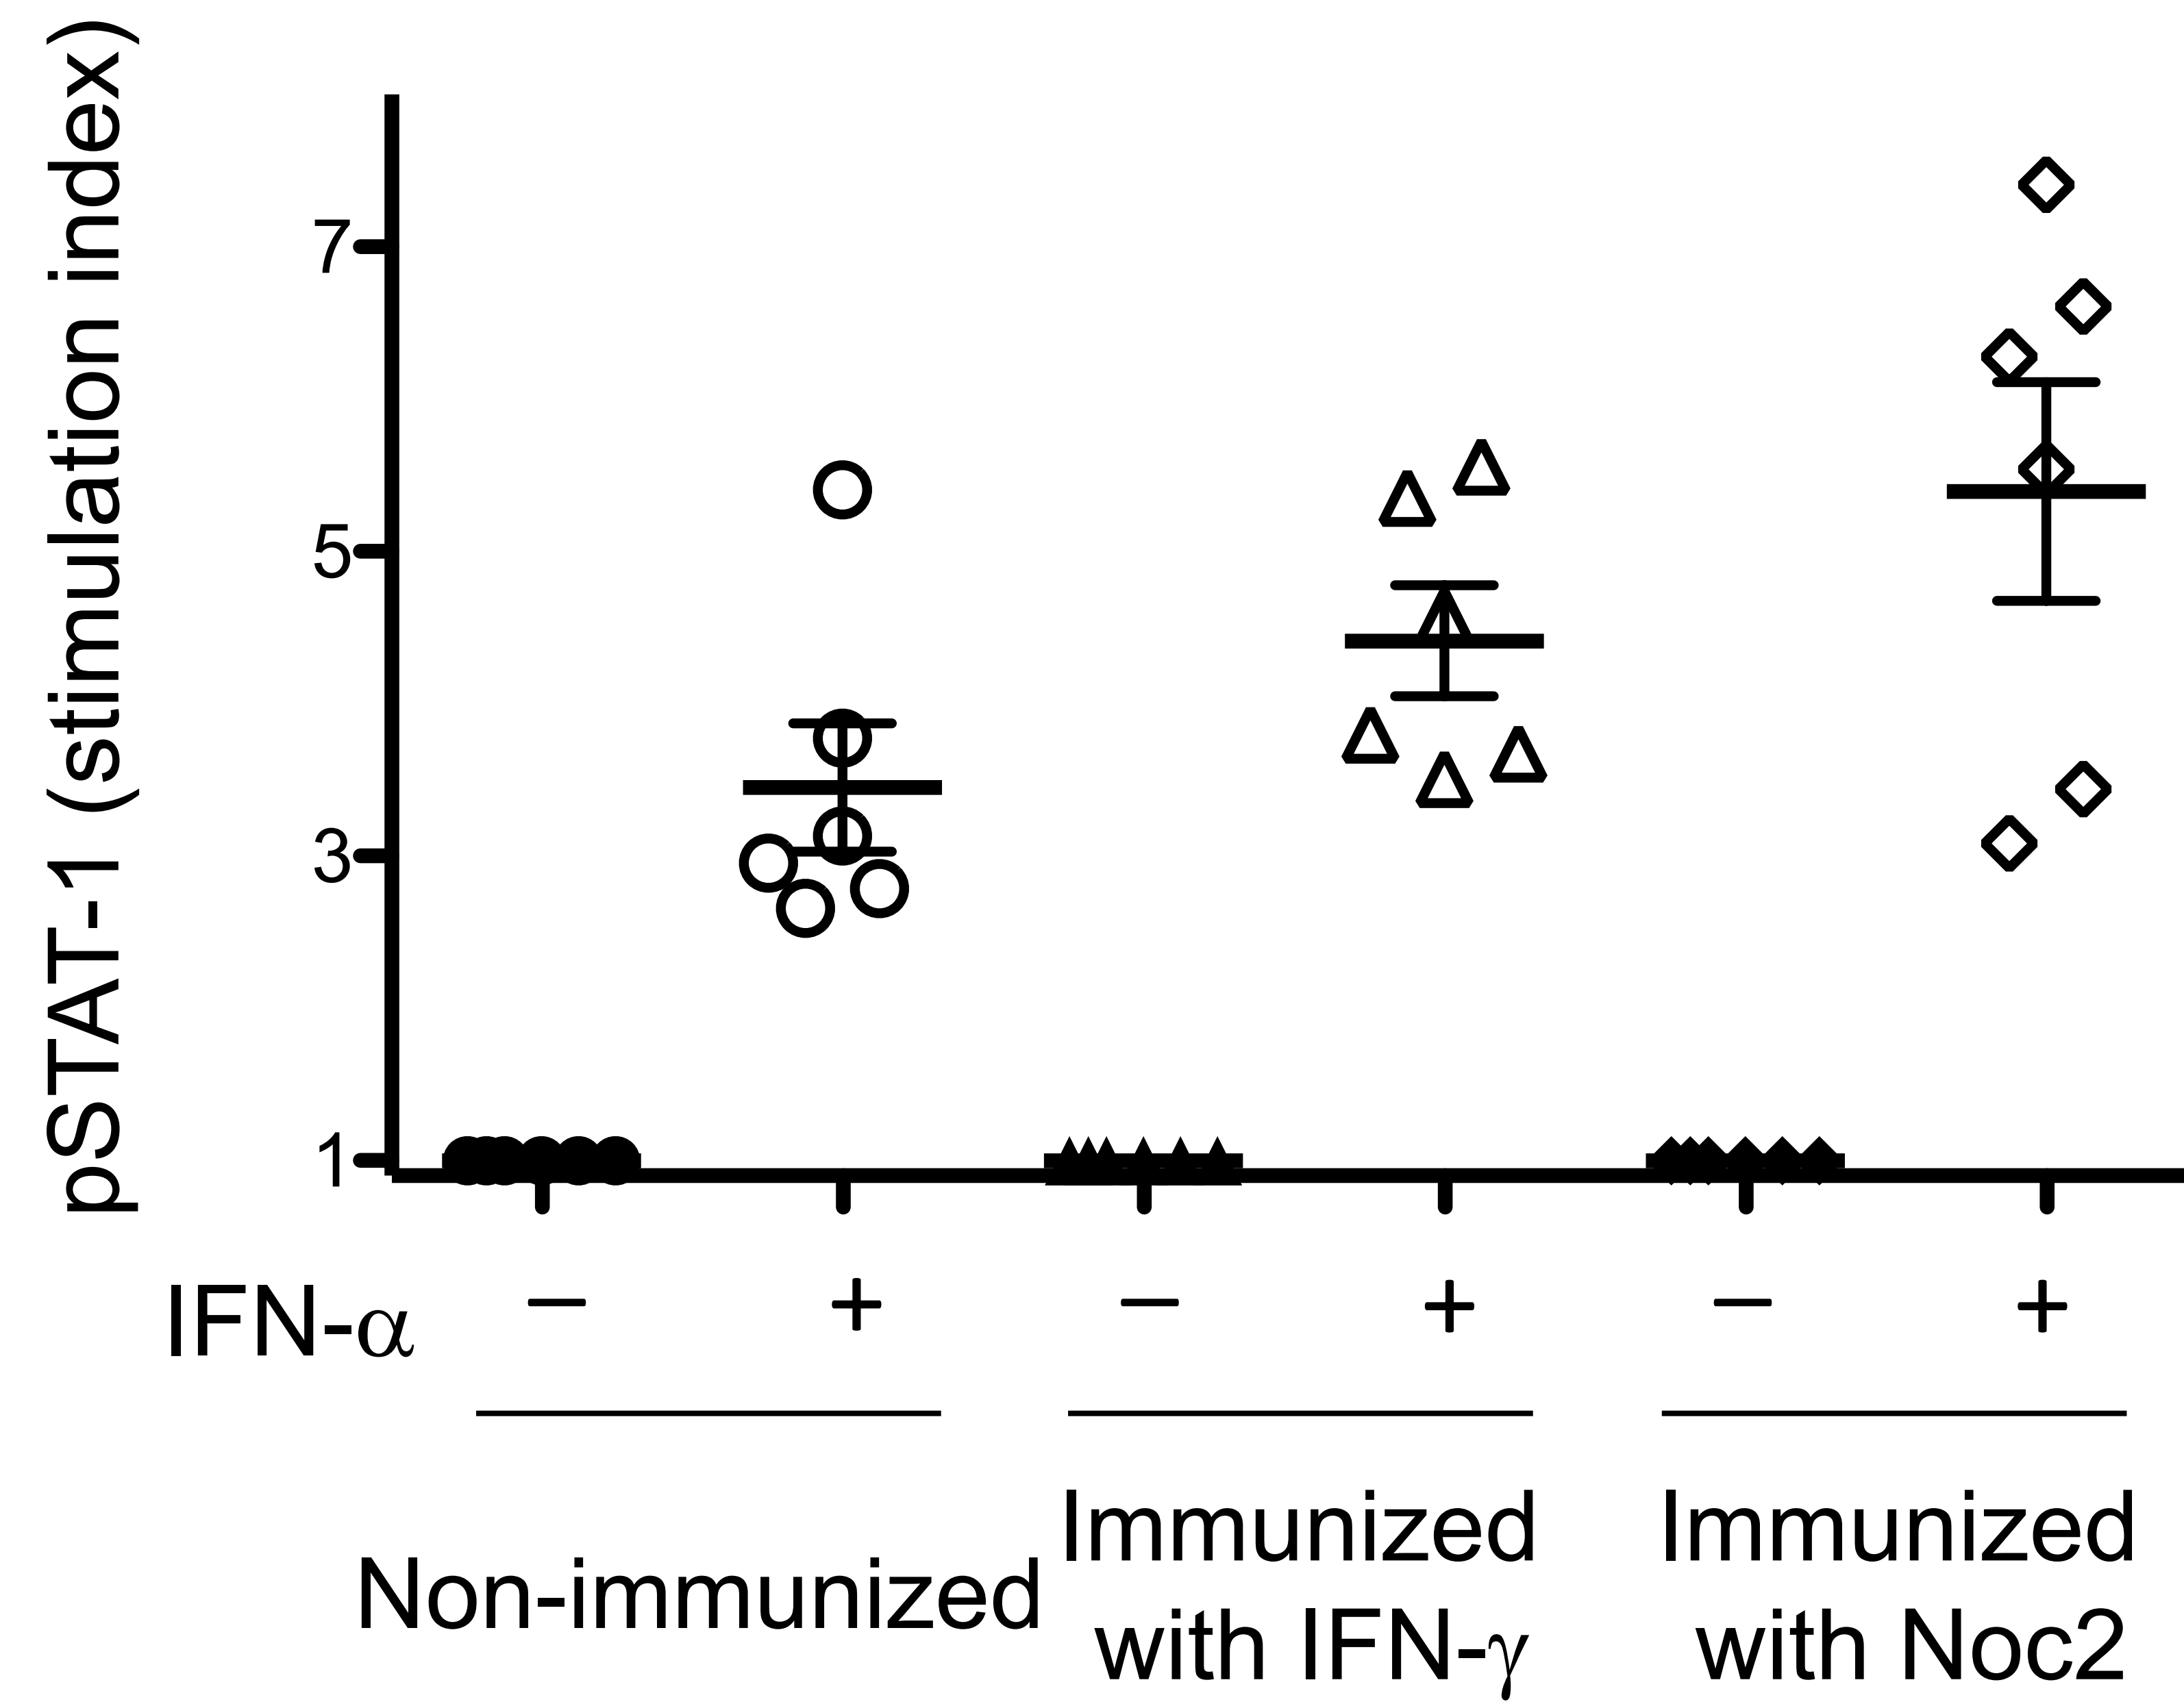

**b**

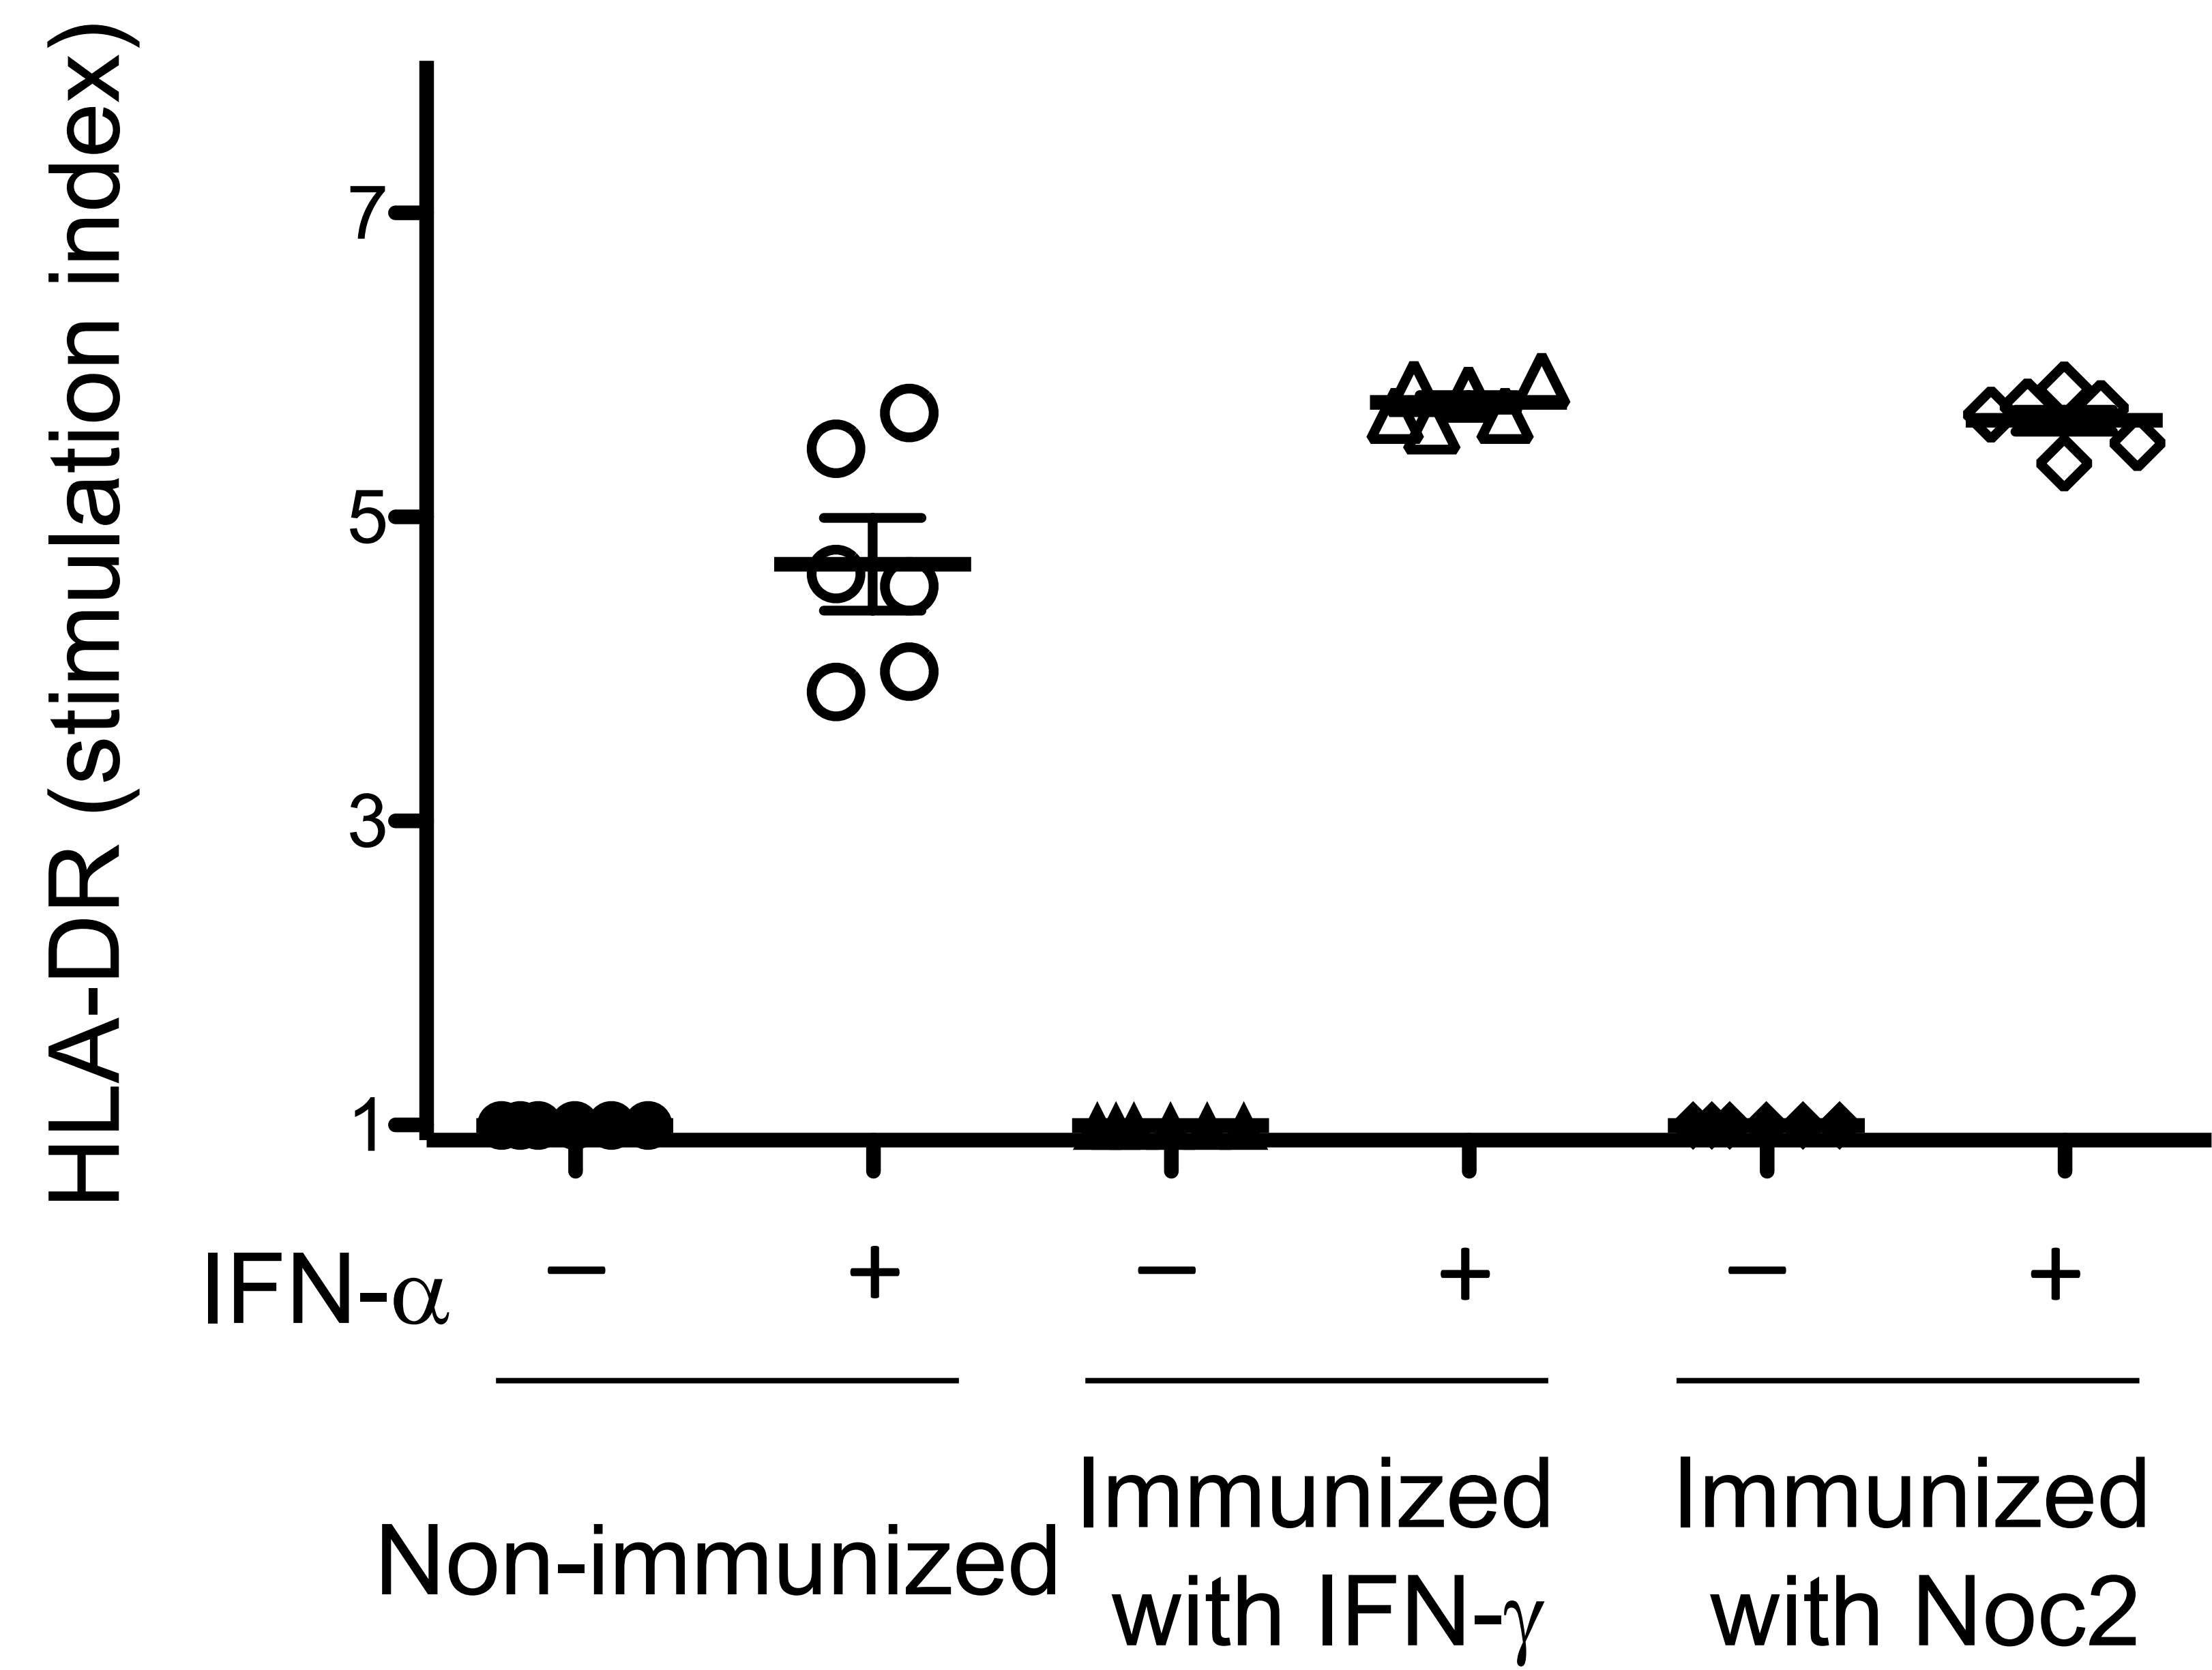

**Supplementary Figure 12. Purified IgG from rats immunized with Noc2 or IFN- $\gamma$  did not block the IFN- $\alpha$ -induced upregulation of p-STAT1 and HLA-DR.** THP1 cells were incubated with IgG from non-immunized rats ( $n = 6$ ), Noc2 peptide-immunized rats ( $n = 6$ ) or IFN- $\gamma$  peptide 6-immunized rats ( $n = 6$ ) and treated with recombinant IFN- $\alpha$ . p-STAT1 levels were measured by flow cytometry with the p-STAT1 monoclonal antibody, and the individual stimulation index (stimulated/unstimulated median fluorescence intensity ratio) is shown, together with the mean and s.e.m. **(a)**. HLA-DR expression was measured by flow cytometry with an HLA-DR monoclonal antibody; the individual stimulation index (stimulated/unstimulated median fluorescence intensity ratio) is shown, together with the mean and s.e.m. **(b)**.

# Supplementary Table 1

| P   | AutoAbs recognition   |                       |              |               |      |                  | EE-IFN- $\gamma$ functional assay |         |                   |         |        |             | Patient |            |      |
|-----|-----------------------|-----------------------|--------------|---------------|------|------------------|-----------------------------------|---------|-------------------|---------|--------|-------------|---------|------------|------|
|     | Mapping               |                       |              | Competition   |      | Affinity         | Patients' Plasma                  |         | Autologous plasma |         |        | Whole Blood |         | HLA typing |      |
|     | IFN- $\gamma$ Peptide | IFN- $\gamma$ Protein | Noc2 peptide | IFN- $\gamma$ | Noc2 | EE-IFN- $\gamma$ | p-STAT1                           | IL12p40 | p-STAT1           | IL12p40 | HLA-DR | p-STAT1     | IL12p40 | DRB1       | DQB1 |
| P1  | +++                   | +++                   | +++          | +++           | +++  | +++              | ++                                | +++     | +                 | +++     | +++    | +           | ++      | 4:05       | 4:01 |
| P2  | ++                    | +++                   | +++          | +++           | +++  | +++              | +                                 | +       | +                 | ++      | ++     | ++          | ++      | 16:02      | 5:02 |
| P3  | +                     | +++                   | n.d.         | +++           | ++   | +++              | +++                               | +++     | +                 | n.d.    | –      | n.d.        | –       | 16:02      | 5:02 |
| P4  | +++                   | +++                   | +++          | +++           | ++   | n.d.             | +++                               | +++     | +                 | ++      | n.d.   | ++          | +++     | 4:05       | 4:01 |
| P5  | ++                    | +++                   | +++          | +++           | n.d. | n.d.             | +                                 | +       | ++                | +       | +      | ++          | +       | n.d.       | n.d. |
| P6  | ++                    | +++                   | n.d.         | n.d.          | ++   | n.d.             | +++                               | +++     | ++                | +++     | n.d.   | +           | ++      | 16:02      | 5:02 |
| P7  | –                     | +++                   | n.d.         | n.d.          | ++   | n.d.             | +++                               | +++     | n.d.              | +       | n.d.   | ++          | n.d.    | 16:02      | 5:02 |
| P8  | n.d.                  | +++                   | n.d.         | n.d.          | ++   | n.d.             | +                                 | +       | n.d.              | +++     | ++     | n.d.        | +++     | 16:02      | 5:02 |
| P9  | +                     | +++                   | –            | n.d.          | n.d. | n.d.             | ++                                | +++     | +                 | +++     | +      | +           | +       | n.d.       | n.d. |
| P10 | ++                    | +++                   | n.d.         | n.d.          | n.d. | n.d.             | ++                                | ++      | ++                | n.d.    | n.d.   | +           | +++     | 16:02      | 5:02 |
| P11 | n.d.                  | +++                   | n.d.         | n.d.          | n.d. | n.d.             | ++                                | +       | +                 | +       | +      | n.d.        | +       | 16:02      | 5:02 |
| P12 | +                     | +++                   | –            | n.d.          | n.d. | +++              | +++                               | +       | n.d.              | n.d.    | n.d.   | +           | n.d.    | 16:02      | 5:02 |
| P13 | +                     | +++                   | –            | n.d.          | n.d. | n.d.             | n.d.                              | ++      | n.d.              | ++      | +++    | n.d.        | ++      | n.d.       | n.d. |
| P14 | +                     | +++                   | –            | n.d.          | n.d. | n.d.             | +                                 | n.d.    | n.d.              | +++     | n.d.   | ++          | +       | n.d.       | n.d. |
| P15 | –                     | +++                   | n.d.         | +++           | n.d. | n.d.             | n.d.                              | +++     | n.d.              | ++      | n.d.   | n.d.        | n.d.    | 16:02      | 5:02 |
| P16 | +++                   | n.d.                  | +++          | +++           | n.d. | n.d.             | n.d.                              | n.d.    | n.d.              | +       | n.d.   | n.d.        | n.d.    | 16:02      | 5:02 |
| P17 | n.d.                  | +++                   | n.d.         | n.d.          | n.d. | n.d.             | +++                               | ++      | n.d.              | ++      | n.d.   | n.d.        | n.d.    | 16:02      | 5:02 |
| P18 | –                     | n.d.                  | n.d.         | n.d.          | n.d. | n.d.             | +                                 | n.d.    | +                 | n.d.    | n.d.   | n.d.        | n.d.    | 16:02      | 5:02 |
| P19 | n.d.                  | n.d.                  | n.d.         | +++           | n.d. | +++              | n.d.                              | +       | n.d.              | n.d.    | n.d.   | n.d.        | n.d.    | 4:05       | 4:01 |

**Supplementary Table 1. Summary of patients and the experiments performed.** This table presents a list of patients and the experiments performed. n.d., not done. In mapping assays: (++++) OD values > 0.8; (++) OD values > 0.3; (+) OD values > 0.15; (-) OD values < 0.15. In competition assays: (++++) *P* values < 0.001; (++) *P* values < 0.01 at 240 mg/ml. In affinity assays: (++++) decrease in OD values > 30%. In EE-IFN- $\gamma$  functional assays: (++++) stimulation index > 2 or fold-increase > 10; (++) stimulation index > 1.5 or fold-increase > 5; (+) stimulation index > 1 or fold-increase > 1; (-) stimulation index < 1 or fold-increase < 1.
